# Supplementary material
Source: ML conference proceedings conference paper supplement (https://proceedings.neurips.cc/paper_files/paper/2022/hash/58cb483be90d31f9afea3a9e992a2abe-Abstract.html)
Supplement: Supplementary file 1 [file 58cb483be90d31f9afea3a9e992a2abe-Supplemental-Conference.zip]

Archive with 177 entries (138 files):
- biologically_plausible_determi-Supplementary Material/Codes/
- biologically_plausible_determi-Supplementary Material/Codes/Biologically-Plausible-DetMaxNNs-for-Blind-Source-Separation-main/
- biologically_plausible_determi-Supplementary Material/Codes/Biologically-Plausible-DetMaxNNs-for-Blind-Source-Separation-main/.gitignore
- biologically_plausible_determi-Supplementary Material/Codes/Biologically-Plausible-DetMaxNNs-for-Blind-Source-Separation-main/data/
- biologically_plausible_determi-Supplementary Material/Codes/Biologically-Plausible-DetMaxNNs-for-Blind-Source-Separation-main/data/TestImages/
- biologically_plausible_determi-Supplementary Material/Codes/Biologically-Plausible-DetMaxNNs-for-Blind-Source-Separation-main/data/TestImages/DSCN5320.JPG
- biologically_plausible_determi-Supplementary Material/Codes/Biologically-Plausible-DetMaxNNs-for-Blind-Source-Separation-main/data/TestImages/IMG-1121.JPG
- biologically_plausible_determi-Supplementary Material/Codes/Biologically-Plausible-DetMaxNNs-for-Blind-Source-Separation-main/data/TestImages/IMG-1122.JPG
- biologically_plausible_determi-Supplementary Material/Codes/Biologically-Plausible-DetMaxNNs-for-Blind-Source-Separation-main/data/TestImages/IMG-1123.JPG
- biologically_plausible_determi-Supplementary Material/Codes/Biologically-Plausible-DetMaxNNs-for-Blind-Source-Separation-main/Figures/
- biologically_plausible_determi-Supplementary Material/Codes/Biologically-Plausible-DetMaxNNs-for-Blind-Source-Separation-main/Figures/networkfigurenewsqueezed1.png
- biologically_plausible_determi-Supplementary Material/Codes/Biologically-Plausible-DetMaxNNs-for-Blind-Source-Separation-main/Figures/NNantisparsesqueezed1.png
- biologically_plausible_determi-Supplementary Material/Codes/Biologically-Plausible-DetMaxNNs-for-Blind-Source-Separation-main/Notebook_Examples/
- biologically_plausible_determi-Supplementary Material/Codes/Biologically-Plausible-DetMaxNNs-for-Blind-Source-Separation-main/Notebook_Examples/Notebook_Experiments_BSM_and_NSM/
- biologically_plausible_determi-Supplementary Material/Codes/Biologically-Plausible-DetMaxNNs-for-Blind-Source-Separation-main/Notebook_Examples/Notebook_Experiments_BSM_and_NSM/BSM_Antisparse_Independent_Demo.ipynb
- biologically_plausible_determi-Supplementary Material/Codes/Biologically-Plausible-DetMaxNNs-for-Blind-Source-Separation-main/Notebook_Examples/Notebook_Experiments_BSM_and_NSM/NSM_NNAntisparse_Independent_Demo.ipynb
- biologically_plausible_determi-Supplementary Material/Codes/Biologically-Plausible-DetMaxNNs-for-Blind-Source-Separation-main/Notebook_Examples/Notebook_Experiments_ICA/
- biologically_plausible_determi-Supplementary Material/Codes/Biologically-Plausible-DetMaxNNs-for-Blind-Source-Separation-main/Notebook_Examples/Notebook_Experiments_ICA/FastICA_Example_Demo1.ipynb
- biologically_plausible_determi-Supplementary Material/Codes/Biologically-Plausible-DetMaxNNs-for-Blind-Source-Separation-main/Notebook_Examples/Notebook_Experiments_ICA/FastICA_Example_Demo2.ipynb
- biologically_plausible_determi-Supplementary Material/Codes/Biologically-Plausible-DetMaxNNs-for-Blind-Source-Separation-main/Notebook_Examples/Notebook_Experiments_ICA/FOBI_Example_Demo.ipynb
- biologically_plausible_determi-Supplementary Material/Codes/Biologically-Plausible-DetMaxNNs-for-Blind-Source-Separation-main/Notebook_Examples/Notebook_Experiments_ICA/ICA_InfoMax_MNEToolBox_Example.ipynb
- biologically_plausible_determi-Supplementary Material/Codes/Biologically-Plausible-DetMaxNNs-for-Blind-Source-Separation-main/Notebook_Examples/Notebook_Experiments_LDMIBatch/
- biologically_plausible_determi-Supplementary Material/Codes/Biologically-Plausible-DetMaxNNs-for-Blind-Source-Separation-main/Notebook_Examples/Notebook_Experiments_LDMIBatch/LDMIBatch_GeneralPolytope5dim_CorrBased.ipynb
- biologically_plausible_determi-Supplementary Material/Codes/Biologically-Plausible-DetMaxNNs-for-Blind-Source-Separation-main/Notebook_Examples/Notebook_Experiments_LDMIBatch/LDMIBatch_NNAntisparse_CorrBased_HighCorrelation.ipynb
- biologically_plausible_determi-Supplementary Material/Codes/Biologically-Plausible-DetMaxNNs-for-Blind-Source-Separation-main/Notebook_Examples/Notebook_Experiments_LDMIBatch/LDMIBatch_NNAntisparse_CovBased_HighCorrelation.ipynb
- biologically_plausible_determi-Supplementary Material/Codes/Biologically-Plausible-DetMaxNNs-for-Blind-Source-Separation-main/Notebook_Examples/Notebook_Experiments_LDMIBatch/LDMIBatch_NNSparse_CorrBased.ipynb
- biologically_plausible_determi-Supplementary Material/Codes/Biologically-Plausible-DetMaxNNs-for-Blind-Source-Separation-main/Notebook_Examples/Notebook_Experiments_LDMIBatch/LDMIBatch_Simplex_CovBased.ipynb
- biologically_plausible_determi-Supplementary Material/Codes/Biologically-Plausible-DetMaxNNs-for-Blind-Source-Separation-main/Notebook_Examples/Notebook_Experiments_LDMIBatch/LDMIBatch_Sparse_CorrBased.ipynb
- biologically_plausible_determi-Supplementary Material/Codes/Biologically-Plausible-DetMaxNNs-for-Blind-Source-Separation-main/Notebook_Examples/Notebook_Experiments_PMF/
- biologically_plausible_determi-Supplementary Material/Codes/Biologically-Plausible-DetMaxNNs-for-Blind-Source-Separation-main/Notebook_Examples/Notebook_Experiments_PMF/PMFv1_Antisparse_HighCorr.ipynb
- biologically_plausible_determi-Supplementary Material/Codes/Biologically-Plausible-DetMaxNNs-for-Blind-Source-Separation-main/Notebook_Examples/Notebook_Experiments_PMF/PMFv1_General_Polytope3dim_Independent.ipynb
- biologically_plausible_determi-Supplementary Material/Codes/Biologically-Plausible-DetMaxNNs-for-Blind-Source-Separation-main/Notebook_Examples/Notebook_Experiments_PMF/PMFv1_General_Polytope5dim_Independent.ipynb
- biologically_plausible_determi-Supplementary Material/Codes/Biologically-Plausible-DetMaxNNs-for-Blind-Source-Separation-main/Notebook_Examples/Notebook_Experiments_PMF/PMFv2_Antisparse_HighCorr.ipynb
- biologically_plausible_determi-Supplementary Material/Codes/Biologically-Plausible-DetMaxNNs-for-Blind-Source-Separation-main/Notebook_Examples/Notebook_Experiments_PMF/PMFv2_NNAntisparse_HighCorr.ipynb
- biologically_plausible_determi-Supplementary Material/Codes/Biologically-Plausible-DetMaxNNs-for-Blind-Source-Separation-main/Notebook_Examples/Notebook_Experiments_PMF/PMFv2_Sparse_Independent.ipynb
- biologically_plausible_determi-Supplementary Material/Codes/Biologically-Plausible-DetMaxNNs-for-Blind-Source-Separation-main/Notebook_Examples/Notebook_Experiments_WSM/
- biologically_plausible_determi-Supplementary Material/Codes/Biologically-Plausible-DetMaxNNs-for-Blind-Source-Separation-main/Notebook_Examples/Notebook_Experiments_WSM/WSM_Antisparse_Correlated_Demo.ipynb
- biologically_plausible_determi-Supplementary Material/Codes/Biologically-Plausible-DetMaxNNs-for-Blind-Source-Separation-main/Notebook_Examples/Notebook_Experiments_WSM/WSM_NNAntisparse_Correlated_Demo1.ipynb
- biologically_plausible_determi-Supplementary Material/Codes/Biologically-Plausible-DetMaxNNs-for-Blind-Source-Separation-main/Notebook_Examples/Notebook_Experiments_WSM/WSM_NNSparse_Independent_Demo.ipynb
- biologically_plausible_determi-Supplementary Material/Codes/Biologically-Plausible-DetMaxNNs-for-Blind-Source-Separation-main/Notebook_Examples/Notebook_Experiments_WSM/WSM_Simplex_Independent_Demo.ipynb
- biologically_plausible_determi-Supplementary Material/Codes/Biologically-Plausible-DetMaxNNs-for-Blind-Source-Separation-main/Notebook_Examples/Notebook_Experiments_WSM/WSM_Sparse_Independent_Demo.ipynb
- biologically_plausible_determi-Supplementary Material/Codes/Biologically-Plausible-DetMaxNNs-for-Blind-Source-Separation-main/Notebook_Examples/Notebook_Experiments_WSM/WSM_SpecialPolytopePMF_Gaussian6x3Mixing_Demo.ipynb
- biologically_plausible_determi-Supplementary Material/Codes/Biologically-Plausible-DetMaxNNs-for-Blind-Source-Separation-main/Notebook_Examples/Notebook_Experiments_WSM/WSM_SpecialPolytopePMF_Gaussian6x3Mixing_Demo2.ipynb
- biologically_plausible_determi-Supplementary Material/Codes/Biologically-Plausible-DetMaxNNs-for-Blind-Source-Separation-main/Notebook_Examples/Notebook_Experiments_WSM/WSM_SpecialPolytopePMF_Gaussian6x3Mixing_Demo3.ipynb
- biologically_plausible_determi-Supplementary Material/Codes/Biologically-Plausible-DetMaxNNs-for-Blind-Source-Separation-main/oldscripts/
- biologically_plausible_determi-Supplementary Material/Codes/Biologically-Plausible-DetMaxNNs-for-Blind-Source-Separation-main/oldscripts/Codes/
- biologically_plausible_determi-Supplementary Material/Codes/Biologically-Plausible-DetMaxNNs-for-Blind-Source-Separation-main/oldscripts/Codes/NumericalExperiments/
- biologically_plausible_determi-Supplementary Material/Codes/Biologically-Plausible-DetMaxNNs-for-Blind-Source-Separation-main/oldscripts/Codes/NumericalExperiments/4PAMExample/
- biologically_plausible_determi-Supplementary Material/Codes/Biologically-Plausible-DetMaxNNs-for-Blind-Source-Separation-main/oldscripts/Codes/NumericalExperiments/4PAMExample/simulation_4PAM_averageSINRv1.py
- biologically_plausible_determi-Supplementary Material/Codes/Biologically-Plausible-DetMaxNNs-for-Blind-Source-Separation-main/oldscripts/Codes/NumericalExperiments/4PAMExample/simulation_4PAM_averageSINRv3.py
- biologically_plausible_determi-Supplementary Material/Codes/Biologically-Plausible-DetMaxNNs-for-Blind-Source-Separation-main/oldscripts/Codes/NumericalExperiments/ImageSeparation/
- biologically_plausible_determi-Supplementary Material/Codes/Biologically-Plausible-DetMaxNNs-for-Blind-Source-Separation-main/oldscripts/Codes/NumericalExperiments/ImageSeparation/ImageSeparationLDMI.ipynb
- biologically_plausible_determi-Supplementary Material/Codes/Biologically-Plausible-DetMaxNNs-for-Blind-Source-Separation-main/oldscripts/Codes/NumericalExperiments/ImageSeparation/ImageSeparationNSMICA.ipynb
- biologically_plausible_determi-Supplementary Material/Codes/Biologically-Plausible-DetMaxNNs-for-Blind-Source-Separation-main/oldscripts/Codes/NumericalExperiments/ImageSeparation/ImageSeparationWSM.ipynb
- biologically_plausible_determi-Supplementary Material/Codes/Biologically-Plausible-DetMaxNNs-for-Blind-Source-Separation-main/oldscripts/Codes/NumericalExperiments/ImageSeparation/TestImages/
- biologically_plausible_determi-Supplementary Material/Codes/Biologically-Plausible-DetMaxNNs-for-Blind-Source-Separation-main/oldscripts/Codes/NumericalExperiments/ImageSeparation/TestImages/DSCN5320.JPG
- biologically_plausible_determi-Supplementary Material/Codes/Biologically-Plausible-DetMaxNNs-for-Blind-Source-Separation-main/oldscripts/Codes/NumericalExperiments/ImageSeparation/TestImages/IMG-1121.JPG
- biologically_plausible_determi-Supplementary Material/Codes/Biologically-Plausible-DetMaxNNs-for-Blind-Source-Separation-main/oldscripts/Codes/NumericalExperiments/ImageSeparation/TestImages/IMG-1122.JPG
- biologically_plausible_determi-Supplementary Material/Codes/Biologically-Plausible-DetMaxNNs-for-Blind-Source-Separation-main/oldscripts/Codes/NumericalExperiments/ImageSeparation/TestImages/IMG-1123.JPG
- biologically_plausible_determi-Supplementary Material/Codes/Biologically-Plausible-DetMaxNNs-for-Blind-Source-Separation-main/oldscripts/Codes/NumericalExperiments/SimulationsForPaper/
- biologically_plausible_determi-Supplementary Material/Codes/Biologically-Plausible-DetMaxNNs-for-Blind-Source-Separation-main/oldscripts/Codes/NumericalExperiments/SimulationsForPaper/Antisparse/
- biologically_plausible_determi-Supplementary Material/Codes/Biologically-Plausible-DetMaxNNs-for-Blind-Source-Separation-main/oldscripts/Codes/NumericalExperiments/SimulationsForPaper/Antisparse/simulation_correlated_antisparseV1.py
- biologically_plausible_determi-Supplementary Material/Codes/Biologically-Plausible-DetMaxNNs-for-Blind-Source-Separation-main/oldscripts/Codes/NumericalExperiments/SimulationsForPaper/Antisparse/simulation_correlated_antisparseV2.py
- biologically_plausible_determi-Supplementary Material/Codes/Biologically-Plausible-DetMaxNNs-for-Blind-Source-Separation-main/oldscripts/Codes/NumericalExperiments/SimulationsForPaper/Antisparse/simulation_correlated_antisparseV3.py
- biologically_plausible_determi-Supplementary Material/Codes/Biologically-Plausible-DetMaxNNs-for-Blind-Source-Separation-main/oldscripts/Codes/NumericalExperiments/SimulationsForPaper/Antisparse/simulation_correlated_antisparseV4.py
- biologically_plausible_determi-Supplementary Material/Codes/Biologically-Plausible-DetMaxNNs-for-Blind-Source-Separation-main/oldscripts/Codes/NumericalExperiments/SimulationsForPaper/MixedFeatures/
- biologically_plausible_determi-Supplementary Material/Codes/Biologically-Plausible-DetMaxNNs-for-Blind-Source-Separation-main/oldscripts/Codes/NumericalExperiments/SimulationsForPaper/MixedFeatures/simulation_mixedantisparseV1.py
- biologically_plausible_determi-Supplementary Material/Codes/Biologically-Plausible-DetMaxNNs-for-Blind-Source-Separation-main/oldscripts/Codes/NumericalExperiments/SimulationsForPaper/MixedFeatures/simulation_nnwsubsparseV1.py
- biologically_plausible_determi-Supplementary Material/Codes/Biologically-Plausible-DetMaxNNs-for-Blind-Source-Separation-main/oldscripts/Codes/NumericalExperiments/SimulationsForPaper/NonnegativeAntisparse/
- biologically_plausible_determi-Supplementary Material/Codes/Biologically-Plausible-DetMaxNNs-for-Blind-Source-Separation-main/oldscripts/Codes/NumericalExperiments/SimulationsForPaper/README2.md
- biologically_plausible_determi-Supplementary Material/Codes/Biologically-Plausible-DetMaxNNs-for-Blind-Source-Separation-main/oldscripts/Codes/NumericalExperiments/SimulationsForPaper/Sparse/
- biologically_plausible_determi-Supplementary Material/Codes/Biologically-Plausible-DetMaxNNs-for-Blind-Source-Separation-main/oldscripts/Codes/NumericalExperiments/SimulationsForPaper/Sparse/simulation_noisy_sparseV1.py
- biologically_plausible_determi-Supplementary Material/Codes/Biologically-Plausible-DetMaxNNs-for-Blind-Source-Separation-main/oldscripts/Codes/NumericalExperiments/SimulationsForPaper/Sparse/simulation_noisy_sparseV2.py
- biologically_plausible_determi-Supplementary Material/Codes/Biologically-Plausible-DetMaxNNs-for-Blind-Source-Separation-main/oldscripts/Codes/NumericalExperiments/SimulationsForPaper/Sparse/simulation_noisy_sparseV3.py
- biologically_plausible_determi-Supplementary Material/Codes/Biologically-Plausible-DetMaxNNs-for-Blind-Source-Separation-main/oldscripts/Codes/NumericalExperiments/SimulationsForPaper/Sparse/simulation_noisy_sparseV4.py
- biologically_plausible_determi-Supplementary Material/Codes/Biologically-Plausible-DetMaxNNs-for-Blind-Source-Separation-main/oldscripts/Codes/NumericalExperiments/SimulationsForPaper/SpecialPolytope/
- biologically_plausible_determi-Supplementary Material/Codes/Biologically-Plausible-DetMaxNNs-for-Blind-Source-Separation-main/oldscripts/Codes/README.md
- biologically_plausible_determi-Supplementary Material/Codes/Biologically-Plausible-DetMaxNNs-for-Blind-Source-Separation-main/oldscripts/Codes/requirements.txt
- biologically_plausible_determi-Supplementary Material/Codes/Biologically-Plausible-DetMaxNNs-for-Blind-Source-Separation-main/oldscripts/Codes/src/
- biologically_plausible_determi-Supplementary Material/Codes/Biologically-Plausible-DetMaxNNs-for-Blind-Source-Separation-main/oldscripts/Codes/src/LDMIBSS.py
- biologically_plausible_determi-Supplementary Material/Codes/Biologically-Plausible-DetMaxNNs-for-Blind-Source-Separation-main/oldscripts/Codes/src/utils.py
- biologically_plausible_determi-Supplementary Material/Codes/Biologically-Plausible-DetMaxNNs-for-Blind-Source-Separation-main/oldscripts/Codes/src/WSMBSS.py
- biologically_plausible_determi-Supplementary Material/Codes/Biologically-Plausible-DetMaxNNs-for-Blind-Source-Separation-main/oldscripts/Codes/src/WSMBSSv2.py
- biologically_plausible_determi-Supplementary Material/Codes/Biologically-Plausible-DetMaxNNs-for-Blind-Source-Separation-main/README.md
- biologically_plausible_determi-Supplementary Material/Codes/Biologically-Plausible-DetMaxNNs-for-Blind-Source-Separation-main/requirements.txt
- biologically_plausible_determi-Supplementary Material/Codes/Biologically-Plausible-DetMaxNNs-for-Blind-Source-Separation-main/Simulations/
- biologically_plausible_determi-Supplementary Material/Codes/Biologically-Plausible-DetMaxNNs-for-Blind-Source-Separation-main/Simulations/4PAM_Example/
- biologically_plausible_determi-Supplementary Material/Codes/Biologically-Plausible-DetMaxNNs-for-Blind-Source-Separation-main/Simulations/4PAM_Example/WSM_4PAM_V1.py
- biologically_plausible_determi-Supplementary Material/Codes/Biologically-Plausible-DetMaxNNs-for-Blind-Source-Separation-main/Simulations/AblationStudies/
- biologically_plausible_determi-Supplementary Material/Codes/Biologically-Plausible-DetMaxNNs-for-Blind-Source-Separation-main/Simulations/AblationStudies/WSM_NNSparse_Ablation_initialD1_V1.py
- biologically_plausible_determi-Supplementary Material/Codes/Biologically-Plausible-DetMaxNNs-for-Blind-Source-Separation-main/Simulations/AblationStudies/WSM_NNSparse_Ablation_initialD1_V2.py
- biologically_plausible_determi-Supplementary Material/Codes/Biologically-Plausible-DetMaxNNs-for-Blind-Source-Separation-main/Simulations/AblationStudies/WSM_NNSparse_Ablation_initialD1_V3.py
- biologically_plausible_determi-Supplementary Material/Codes/Biologically-Plausible-DetMaxNNs-for-Blind-Source-Separation-main/Simulations/AblationStudies/WSM_NNSparse_Ablation_muD1_V1.py
- biologically_plausible_determi-Supplementary Material/Codes/Biologically-Plausible-DetMaxNNs-for-Blind-Source-Separation-main/Simulations/AblationStudies/WSM_NNSparse_Ablation_muD1_V2.py
- biologically_plausible_determi-Supplementary Material/Codes/Biologically-Plausible-DetMaxNNs-for-Blind-Source-Separation-main/Simulations/AblationStudies/WSM_NNSparse_Ablation_MUS_V1.py
- biologically_plausible_determi-Supplementary Material/Codes/Biologically-Plausible-DetMaxNNs-for-Blind-Source-Separation-main/Simulations/AblationStudies/WSM_NNSparse_Ablation_MUS_V2.py
- biologically_plausible_determi-Supplementary Material/Codes/Biologically-Plausible-DetMaxNNs-for-Blind-Source-Separation-main/Simulations/AblationStudies/WSM_NNSparse_Ablation_zetaV1.py
- biologically_plausible_determi-Supplementary Material/Codes/Biologically-Plausible-DetMaxNNs-for-Blind-Source-Separation-main/Simulations/AblationStudies/WSM_NNSparse_Ablation_zetaV2.py
- biologically_plausible_determi-Supplementary Material/Codes/Biologically-Plausible-DetMaxNNs-for-Blind-Source-Separation-main/Simulations/AblationStudies/WSM_NNSparse_Ablation_zetaV3.py
- biologically_plausible_determi-Supplementary Material/Codes/Biologically-Plausible-DetMaxNNs-for-Blind-Source-Separation-main/Simulations/AblationStudies/WSM_NNSparse_Ablation_zetaV4.py
- biologically_plausible_determi-Supplementary Material/Codes/Biologically-Plausible-DetMaxNNs-for-Blind-Source-Separation-main/Simulations/AblationStudies/WSM_NNSparse_Ablation_zetaV5.py
- biologically_plausible_determi-Supplementary Material/Codes/Biologically-Plausible-DetMaxNNs-for-Blind-Source-Separation-main/Simulations/AnalyzeSimulationResults/
- biologically_plausible_determi-Supplementary Material/Codes/Biologically-Plausible-DetMaxNNs-for-Blind-Source-Separation-main/Simulations/AnalyzeSimulationResults/.ipynb_checkpoints/
- biologically_plausible_determi-Supplementary Material/Codes/Biologically-Plausible-DetMaxNNs-for-Blind-Source-Separation-main/Simulations/AnalyzeSimulationResults/.ipynb_checkpoints/PlotSimulationResults_4PAM-checkpoint.ipynb
- biologically_plausible_determi-Supplementary Material/Codes/Biologically-Plausible-DetMaxNNs-for-Blind-Source-Separation-main/Simulations/AnalyzeSimulationResults/.ipynb_checkpoints/PlotSimulationResults_Antisparse-checkpoint.ipynb
- biologically_plausible_determi-Supplementary Material/Codes/Biologically-Plausible-DetMaxNNs-for-Blind-Source-Separation-main/Simulations/AnalyzeSimulationResults/.ipynb_checkpoints/PlotSimulationResults_SparseNoisy-checkpoint.ipynb
- biologically_plausible_determi-Supplementary Material/Codes/Biologically-Plausible-DetMaxNNs-for-Blind-Source-Separation-main/Simulations/AnalyzeSimulationResults/Figures/
- biologically_plausible_determi-Supplementary Material/Codes/Biologically-Plausible-DetMaxNNs-for-Blind-Source-Separation-main/Simulations/AnalyzeSimulationResults/Figures/D1start_ablation.pdf
- biologically_plausible_determi-Supplementary Material/Codes/Biologically-Plausible-DetMaxNNs-for-Blind-Source-Separation-main/Simulations/AnalyzeSimulationResults/Figures/muD1_ablation.pdf
- biologically_plausible_determi-Supplementary Material/Codes/Biologically-Plausible-DetMaxNNs-for-Blind-Source-Separation-main/Simulations/AnalyzeSimulationResults/Figures/MUS_ablation.pdf
- biologically_plausible_determi-Supplementary Material/Codes/Biologically-Plausible-DetMaxNNs-for-Blind-Source-Separation-main/Simulations/AnalyzeSimulationResults/Figures/zeta_ablation.pdf
- biologically_plausible_determi-Supplementary Material/Codes/Biologically-Plausible-DetMaxNNs-for-Blind-Source-Separation-main/Simulations/AnalyzeSimulationResults/PlotSimulationResults_3dimSpecialPolytope.ipynb
- biologically_plausible_determi-Supplementary Material/Codes/Biologically-Plausible-DetMaxNNs-for-Blind-Source-Separation-main/Simulations/AnalyzeSimulationResults/PlotSimulationResults_4PAM.ipynb
- biologically_plausible_determi-Supplementary Material/Codes/Biologically-Plausible-DetMaxNNs-for-Blind-Source-Separation-main/Simulations/AnalyzeSimulationResults/PlotSimulationResults_AblationStudies.ipynb
- biologically_plausible_determi-Supplementary Material/Codes/Biologically-Plausible-DetMaxNNs-for-Blind-Source-Separation-main/Simulations/AnalyzeSimulationResults/PlotSimulationResults_Antisparse.ipynb
- biologically_plausible_determi-Supplementary Material/Codes/Biologically-Plausible-DetMaxNNs-for-Blind-Source-Separation-main/Simulations/AnalyzeSimulationResults/PlotSimulationResults_SparseNoisy.ipynb
- biologically_plausible_determi-Supplementary Material/Codes/Biologically-Plausible-DetMaxNNs-for-Blind-Source-Separation-main/Simulations/AntisparseCorrelated/
- biologically_plausible_determi-Supplementary Material/Codes/Biologically-Plausible-DetMaxNNs-for-Blind-Source-Separation-main/Simulations/AntisparseCorrelated/WSM_Antisparse_CorrelatedV3.py
- biologically_plausible_determi-Supplementary Material/Codes/Biologically-Plausible-DetMaxNNs-for-Blind-Source-Separation-main/Simulations/AntisparseCorrelated/WSM_Antisparse_CorrelatedV4.py
- biologically_plausible_determi-Supplementary Material/Codes/Biologically-Plausible-DetMaxNNs-for-Blind-Source-Separation-main/Simulations/AntisparseCorrelated/WSM_Antisparse_CorrelatedV5.py
- biologically_plausible_determi-Supplementary Material/Codes/Biologically-Plausible-DetMaxNNs-for-Blind-Source-Separation-main/Simulations/ImageSeparation/
- biologically_plausible_determi-Supplementary Material/Codes/Biologically-Plausible-DetMaxNNs-for-Blind-Source-Separation-main/Simulations/ImageSeparation/ImageSeparationNSMandICA.ipynb
- biologically_plausible_determi-Supplementary Material/Codes/Biologically-Plausible-DetMaxNNs-for-Blind-Source-Separation-main/Simulations/ImageSeparation/ImageSeparationWSM.ipynb
- biologically_plausible_determi-Supplementary Material/Codes/Biologically-Plausible-DetMaxNNs-for-Blind-Source-Separation-main/Simulations/NonnegativeAntisparseCorrelated/
- biologically_plausible_determi-Supplementary Material/Codes/Biologically-Plausible-DetMaxNNs-for-Blind-Source-Separation-main/Simulations/NonnegativeAntisparseCorrelated/WSM_NNAntisparseCorrelatedV1.py
- biologically_plausible_determi-Supplementary Material/Codes/Biologically-Plausible-DetMaxNNs-for-Blind-Source-Separation-main/Simulations/NonnegativeAntisparseCorrelated/WSM_NNAntisparseCorrelatedV2.py
- biologically_plausible_determi-Supplementary Material/Codes/Biologically-Plausible-DetMaxNNs-for-Blind-Source-Separation-main/Simulations/NonnegativeAntisparseCorrelated/WSM_NNAntisparseCorrelatedV3.py
- biologically_plausible_determi-Supplementary Material/Codes/Biologically-Plausible-DetMaxNNs-for-Blind-Source-Separation-main/Simulations/NonnegativeAntisparseCorrelated/WSM_NNAntisparseCorrelatedV4.py
- biologically_plausible_determi-Supplementary Material/Codes/Biologically-Plausible-DetMaxNNs-for-Blind-Source-Separation-main/Simulations/NonnegativeAntisparseCorrelated/WSM_NNAntisparseCorrelatedV5.py
- biologically_plausible_determi-Supplementary Material/Codes/Biologically-Plausible-DetMaxNNs-for-Blind-Source-Separation-main/Simulations/NonnegativeAntisparseCorrelated/WSM_NNAntisparseCorrelatedV6.py
- biologically_plausible_determi-Supplementary Material/Codes/Biologically-Plausible-DetMaxNNs-for-Blind-Source-Separation-main/Simulations/NonnegativeAntisparseCorrelated/WSM_NNAntisparseCorrelatedV7.py
- biologically_plausible_determi-Supplementary Material/Codes/Biologically-Plausible-DetMaxNNs-for-Blind-Source-Separation-main/Simulations/NonnegativeAntisparseCorrelated/WSM_NNAntisparseCorrelatedV8.py
- biologically_plausible_determi-Supplementary Material/Codes/Biologically-Plausible-DetMaxNNs-for-Blind-Source-Separation-main/Simulations/NonnegativeSparseNoisy/
- biologically_plausible_determi-Supplementary Material/Codes/Biologically-Plausible-DetMaxNNs-for-Blind-Source-Separation-main/Simulations/NonnegativeSparseNoisy/WSM_NNSparse_NoisyV1.py
- biologically_plausible_determi-Supplementary Material/Codes/Biologically-Plausible-DetMaxNNs-for-Blind-Source-Separation-main/Simulations/SparseDictionaryLearning/
- biologically_plausible_determi-Supplementary Material/Codes/Biologically-Plausible-DetMaxNNs-for-Blind-Source-Separation-main/Simulations/SparseDictionaryLearning/WSM_Olshaussen_Receptive_Fields.ipynb
- biologically_plausible_determi-Supplementary Material/Codes/Biologically-Plausible-DetMaxNNs-for-Blind-Source-Separation-main/Simulations/SparseNoisy/
- biologically_plausible_determi-Supplementary Material/Codes/Biologically-Plausible-DetMaxNNs-for-Blind-Source-Separation-main/Simulations/SparseNoisy/WSM_Sparse_NoisyV1.py
- biologically_plausible_determi-Supplementary Material/Codes/Biologically-Plausible-DetMaxNNs-for-Blind-Source-Separation-main/Simulations/SpecialPolytope/
- biologically_plausible_determi-Supplementary Material/Codes/Biologically-Plausible-DetMaxNNs-for-Blind-Source-Separation-main/Simulations/SpecialPolytope/WSM_SpecialPolyV1.py
- biologically_plausible_determi-Supplementary Material/Codes/Biologically-Plausible-DetMaxNNs-for-Blind-Source-Separation-main/Simulations/SpecialPolytope/WSM_SpecialPolyV2.py
- biologically_plausible_determi-Supplementary Material/Codes/Biologically-Plausible-DetMaxNNs-for-Blind-Source-Separation-main/Simulations/SpecialPolytope/WSM_SpecialPolyV3.py
- biologically_plausible_determi-Supplementary Material/Codes/Biologically-Plausible-DetMaxNNs-for-Blind-Source-Separation-main/src/
- biologically_plausible_determi-Supplementary Material/Codes/Biologically-Plausible-DetMaxNNs-for-Blind-Source-Separation-main/src/__pycache__/
- biologically_plausible_determi-Supplementary Material/Codes/Biologically-Plausible-DetMaxNNs-for-Blind-Source-Separation-main/src/__pycache__/BCA.cpython-38.pyc
- biologically_plausible_determi-Supplementary Material/Codes/Biologically-Plausible-DetMaxNNs-for-Blind-Source-Separation-main/src/__pycache__/BSMBSS.cpython-38.pyc
- biologically_plausible_determi-Supplementary Material/Codes/Biologically-Plausible-DetMaxNNs-for-Blind-Source-Separation-main/src/__pycache__/bss_utils.cpython-38.pyc
- biologically_plausible_determi-Supplementary Material/Codes/Biologically-Plausible-DetMaxNNs-for-Blind-Source-Separation-main/src/__pycache__/BSSbase.cpython-38.pyc
- biologically_plausible_determi-Supplementary Material/Codes/Biologically-Plausible-DetMaxNNs-for-Blind-Source-Separation-main/src/__pycache__/CorInfoMaxBSS.cpython-38.pyc
- biologically_plausible_determi-Supplementary Material/Codes/Biologically-Plausible-DetMaxNNs-for-Blind-Source-Separation-main/src/__pycache__/dsp_utils.cpython-38.pyc
- biologically_plausible_determi-Supplementary Material/Codes/Biologically-Plausible-DetMaxNNs-for-Blind-Source-Separation-main/src/__pycache__/general_utils.cpython-38.pyc
- biologically_plausible_determi-Supplementary Material/Codes/Biologically-Plausible-DetMaxNNs-for-Blind-Source-Separation-main/src/__pycache__/ICA.cpython-38.pyc
- biologically_plausible_determi-Supplementary Material/Codes/Biologically-Plausible-DetMaxNNs-for-Blind-Source-Separation-main/src/__pycache__/LDMIBSS.cpython-38.pyc
- biologically_plausible_determi-Supplementary Material/Codes/Biologically-Plausible-DetMaxNNs-for-Blind-Source-Separation-main/src/__pycache__/NSMBSS.cpython-38.pyc
- biologically_plausible_determi-Supplementary Material/Codes/Biologically-Plausible-DetMaxNNs-for-Blind-Source-Separation-main/src/__pycache__/numba_utils.cpython-38.pyc
- biologically_plausible_determi-Supplementary Material/Codes/Biologically-Plausible-DetMaxNNs-for-Blind-Source-Separation-main/src/__pycache__/PMF.cpython-38.pyc
- biologically_plausible_determi-Supplementary Material/Codes/Biologically-Plausible-DetMaxNNs-for-Blind-Source-Separation-main/src/__pycache__/pmfgeneral8.cpython-38.pyc
- biologically_plausible_determi-Supplementary Material/Codes/Biologically-Plausible-DetMaxNNs-for-Blind-Source-Separation-main/src/__pycache__/polytope_utils.cpython-38.pyc
- biologically_plausible_determi-Supplementary Material/Codes/Biologically-Plausible-DetMaxNNs-for-Blind-Source-Separation-main/src/__pycache__/SSMF.cpython-38.pyc
- biologically_plausible_determi-Supplementary Material/Codes/Biologically-Plausible-DetMaxNNs-for-Blind-Source-Separation-main/src/__pycache__/visualization_utils.cpython-38.pyc
- biologically_plausible_determi-Supplementary Material/Codes/Biologically-Plausible-DetMaxNNs-for-Blind-Source-Separation-main/src/__pycache__/WSMBSS.cpython-38.pyc
- biologically_plausible_determi-Supplementary Material/Codes/Biologically-Plausible-DetMaxNNs-for-Blind-Source-Separation-main/src/BSMBSS.py
- biologically_plausible_determi-Supplementary Material/Codes/Biologically-Plausible-DetMaxNNs-for-Blind-Source-Separation-main/src/bss_utils.py
- biologically_plausible_determi-Supplementary Material/Codes/Biologically-Plausible-DetMaxNNs-for-Blind-Source-Separation-main/src/BSSbase.py
- biologically_plausible_determi-Supplementary Material/Codes/Biologically-Plausible-DetMaxNNs-for-Blind-Source-Separation-main/src/dsp_utils.py
- biologically_plausible_determi-Supplementary Material/Codes/Biologically-Plausible-DetMaxNNs-for-Blind-Source-Separation-main/src/general_utils.py
- biologically_plausible_determi-Supplementary Material/Codes/Biologically-Plausible-DetMaxNNs-for-Blind-Source-Separation-main/src/ICA.py
- biologically_plausible_determi-Supplementary Material/Codes/Biologically-Plausible-DetMaxNNs-for-Blind-Source-Separation-main/src/LDMIBSS.py
- biologically_plausible_determi-Supplementary Material/Codes/Biologically-Plausible-DetMaxNNs-for-Blind-Source-Separation-main/src/NSMBSS.py
- biologically_plausible_determi-Supplementary Material/Codes/Biologically-Plausible-DetMaxNNs-for-Blind-Source-Separation-main/src/numba_utils.py
- biologically_plausible_determi-Supplementary Material/Codes/Biologically-Plausible-DetMaxNNs-for-Blind-Source-Separation-main/src/PMF.py
- biologically_plausible_determi-Supplementary Material/Codes/Biologically-Plausible-DetMaxNNs-for-Blind-Source-Separation-main/src/polytope_utils.py
- biologically_plausible_determi-Supplementary Material/Codes/Biologically-Plausible-DetMaxNNs-for-Blind-Source-Separation-main/src/SSMF.py
- biologically_plausible_determi-Supplementary Material/Codes/Biologically-Plausible-DetMaxNNs-for-Blind-Source-Separation-main/src/utils.py
- biologically_plausible_determi-Supplementary Material/Codes/Biologically-Plausible-DetMaxNNs-for-Blind-Source-Separation-main/src/visualization_utils.py
- biologically_plausible_determi-Supplementary Material/Codes/Biologically-Plausible-DetMaxNNs-for-Blind-Source-Separation-main/src/WSMBSS.py
- biologically_plausible_determi-Supplementary Material/wsmappendixfinal.pdf
