# Supplementary material
Source: ML conference proceedings conference paper supplement (https://proceedings.neurips.cc/paper_files/paper/2022/hash/58cb483be90d31f9afea3a9e992a2abe-Abstract.html)
Supplement: Supplementary file 1 [file 58cb483be90d31f9afea3a9e992a2abe-Supplemental-Conference.zip › biologically_plausible_determi-Supplementary Material/Codes/Biologically-Plausible-DetMaxNNs-for-Blind-Source-Separation-main/Notebook_Examples/Notebook_Experiments_ICA/FOBI_Example_Demo.ipynb]

# %% [markdown]
# Import Required Libraries

# %% [code]
import sys

sys.path.insert(0, "../../src")
import numpy as np
import matplotlib.pyplot as plt
from IPython import display
import pylab as pl

from ICA import *
from dsp_utils import *
from general_utils import *
from visualization_utils import *

import warnings

warnings.filterwarnings("ignore")

notebook_name = "Fourth_Order_Blind_Identification"

# %% [markdown]
# Source Generation and Mixing Scenario

# %% [code]
# Generate the sources and mixtures
S, X, A = generate_synthetic_data_SMICA(seed=np.random.randint(2500))

print("The following is the mixture matrix A")
display_matrix(A)

# %% [markdown]
# Visualize Generated Sources and Mixtures

# %% [code]
subplot_1D_signals(
    S[:, 0:100], title="Original Signals", figsize=(15.2, 9), colorcode=None
)
subplot_1D_signals(
    X[:, 0:100], title="Mixture Signals", figsize=(15, 18), colorcode=None
)

# %% [markdown]
# Run FOBI Algorithm on Mixture Signals

# %% [code]
with Timer() as t:
    Y, W = fobi(X, return_unmixing_matrix=True)
print("Algorithm took %f sec." % (t.interval))

# %% [markdown]
# Calculate Resulting Component SNRs and Overall SINR

# %% [code]
Y = W @ X
Y_ = signed_and_permutation_corrected_sources(S, Y)
coef_ = ((Y_ * S).sum(axis=1) / (Y_ * Y_).sum(axis=1)).reshape(-1, 1)
Y_ = coef_ * Y_

print("Component SNR Values : {}\n".format(snr(S, Y_)))

SINRwsm = 10 * np.log10(CalculateSINR(Y_, S)[0])

print("Overall SINR : {}".format(SINRwsm))

# %% [markdown]
# Vizualize Extracted Signals Compared to Original Sources

# %% [code]
subplot_1D_signals(
    Y_[:, 0:100],
    title="Extracted Signals (Sign and Permutation Corrected)",
    figsize=(15.2, 9),
    colorcode=None,
)
subplot_1D_signals(
    S[:, 0:100], title="Original Signals", figsize=(15.2, 9), colorcode=None
)
