# Supplementary material
Source: ML conference proceedings conference paper supplement (https://proceedings.neurips.cc/paper_files/paper/2022/hash/58cb483be90d31f9afea3a9e992a2abe-Abstract.html)
Supplement: Supplementary file 1 [file 58cb483be90d31f9afea3a9e992a2abe-Supplemental-Conference.zip › biologically_plausible_determi-Supplementary Material/Codes/Biologically-Plausible-DetMaxNNs-for-Blind-Source-Separation-main/Notebook_Examples/Notebook_Experiments_PMF/PMFv2_NNAntisparse_HighCorr.ipynb]

# %% [markdown]
# Import Required Libraries

# %% [code]
import sys
import os

os.chdir("..")
os.chdir("..")
os.chdir("./src")
# sys.path.append("./src")

# %% [code]
import numpy as np
import matplotlib.pyplot as plt
from IPython import display
import pylab as pl

from PMF import *
from general_utils import *
from visualization_utils import *

import warnings

warnings.filterwarnings("ignore")

notebook_name = "Nonnegative_Antisparse_Copula"

# %% [markdown]
# Source Generation and Mixing Scenario

# %% [code]
N = 10000
NumberofSources = 5
NumberofMixtures = 10
Sgt = generate_correlated_copula_sources(
    rho=0.7,
    df=4,
    n_sources=NumberofSources,
    size_sources=N,
    decreasing_correlation=True,
)

print("The following is the correlation matrix of sources")
display_matrix(np.corrcoef(Sgt))

# Generate Mxr random mixing from i.i.d N(0,1)
Agt = np.random.randn(NumberofMixtures, NumberofSources)
Y = np.dot(Agt, Sgt)

SNR = 30
Y, NoisePart = addWGN(Y, SNR, return_noise=True)

SNRinp = 10 * np.log10(
    np.sum(np.mean((Y - NoisePart) ** 2, axis=1))
    / np.sum(np.mean(NoisePart**2, axis=1))
)
print("The following is the mixture matrix A")
display_matrix(Agt)
print("Input SNR is : {}".format(SNRinp))

# %% [markdown]
# Visualize Generated Sources and Mixtures

# %% [code]
subplot_1D_signals(
    Sgt[:, 0:100], title="Original Signals", figsize=(15.2, 9), colorcode=None
)
subplot_1D_signals(
    Y[:, 0:100], title="Mixture Signals", figsize=(15, 18), colorcode=None
)

# %% [markdown]
# Algorithm Hyperparameter Selection and Weight Initialization

# %% [code]
s_dim = Sgt.shape[0]
y_dim = Y.shape[0]
debug_iteration_point = 25000
model = PMFv2(s_dim=s_dim, y_dim=y_dim, set_ground_truth=True, Sgt=Sgt, Agt=Agt)

# %% [markdown]
# Run PMF Algorithm on Mixture Signals

# %% [code]
model.fit_batch_nnantisparse(
    Y,
    n_iterations=100000,
    step_size_scale=100,
    debug_iteration_point=debug_iteration_point,
    plot_in_jupyter=True,
)

# %% [markdown]
# Calculate Resulting Component SNRs and Overall SINR

# %% [code]
Spmf = model.S
Spmf = signed_and_permutation_corrected_sources(Sgt, Spmf)
coef_ = ((Spmf * Sgt).sum(axis=1) / (Spmf * Spmf).sum(axis=1)).reshape(-1, 1)
Spmf = coef_ * Spmf

print("Component SNR Values : {}\n".format(snr_jit(Sgt, Spmf)))

SINR = 10 * np.log10(CalculateSINRjit(Spmf, Sgt)[0])

print("Overall SINR : {}".format(SINR))

# %% [code]
WfPMF = model.W
Spmf = WfPMF @ Y
Spmf = signed_and_permutation_corrected_sources(Sgt, Spmf)
coef_ = ((Spmf * Sgt).sum(axis=1) / (Spmf * Spmf).sum(axis=1)).reshape(-1, 1)
Spmf = coef_ * Spmf

print("Component SNR Values : {}\n".format(snr_jit(Sgt, Spmf)))

SINR = 10 * np.log10(CalculateSINRjit(Spmf, Sgt)[0])

print("Overall SINR : {}".format(SINR))

# %% [markdown]
# Vizualize Extracted Signals Compared to Original Sources

# %% [code]
subplot_1D_signals(
    Spmf[:, 0:100],
    title="Extracted Signals (Sign and Permutation Corrected)",
    figsize=(15.2, 9),
    colorcode=None,
)
subplot_1D_signals(
    Sgt[:, 0:100], title="Original Signals", figsize=(15.2, 9), colorcode=None
)
