# Supplementary material
Source: ML conference proceedings conference paper supplement (https://proceedings.neurips.cc/paper_files/paper/2022/hash/58cb483be90d31f9afea3a9e992a2abe-Abstract.html)
Supplement: Supplementary file 1 [file 58cb483be90d31f9afea3a9e992a2abe-Supplemental-Conference.zip › biologically_plausible_determi-Supplementary Material/Codes/Biologically-Plausible-DetMaxNNs-for-Blind-Source-Separation-main/Notebook_Examples/Notebook_Experiments_WSM/WSM_NNSparse_Independent_Demo.ipynb]

# %% [markdown]
# Import Required Libraries

# %% [code]
import sys
sys.path.insert(0, '../../src')
import numpy as np
import matplotlib.pyplot as plt
from tqdm import tqdm
from WSMBSS import *
from general_utils import *
from dsp_utils import *
from bss_utils import *
from numba_utils import *
from visualization_utils import *

import pylab as pl
import warnings

warnings.filterwarnings("ignore")
# np.random.seed(874)
# %load_ext autoreload
# %autoreload 2
notebook_name = "Nonnegative_Sparse"

# %% [markdown]
# Source Generation and Mixing Scenario

# %% [code]
NumberofSources = 5
NumberofMixtures = 10
N = 5 * 1e5
S = 2 * np.random.uniform(size=(NumberofSources, int(N))) - 1
S = ProjectRowstoL1NormBall(S.T).T
S = S * (S >= 0)

INPUT_STD = 0.5
A, X = WSM_Mixing_Scenario(S, NumberofMixtures, INPUT_STD)
SNR = 30
X, NoisePart = addWGN(X, SNR, return_noise=True)

SNRinp = 10 * np.log10(
    np.sum(np.mean((X - NoisePart) ** 2, axis=1))
    / np.sum(np.mean(NoisePart**2, axis=1))
)
print("The following is the mixture matrix A")
display_matrix(A)
print("Input SNR is : {}".format(SNRinp))

plt.scatter(S[0, :], S[2, :])
plt.show()

# %% [markdown]
# Visualize Generated Sources and Mixtures

# %% [code]
subplot_1D_signals(
    S[:, 0:100], title="Original Signals", figsize=(15.2, 9), colorcode=None
)
subplot_1D_signals(
    X[:, 0:100], title="Mixture Signals", figsize=(15, 18), colorcode=None
)

# %% [markdown]
# Algorithm Hyperparameter Selection and Weight Initialization

# %% [code]
MUS = 0.25

gammaM_start = [MUS, MUS]
gammaM_stop = [1e-3, 1e-3]
gammaW_start = [MUS, MUS]
gammaW_stop = [1e-3, 1e-3]

OUTPUT_COMP_TOL = 1e-5
MAX_OUT_ITERATIONS = 3000
LayerGains = [8, 1]
LayerMinimumGains = [1e-6, 1]
LayerMaximumGains = [1e6, 1.001]
WScalings = [0.0033, 0.0033]
GamScalings = [0.02, 0.02]
zeta = 1e-4
beta = 0.5
muD = [20, 1e-2]

s_dim = S.shape[0]
x_dim = X.shape[0]
h_dim = s_dim
samples = S.shape[1]

# %% [markdown]
# Run WSM Algorithm on Mixture Signals

# %% [code]
debug_iteration_point = 25000

model = OnlineWSMBSS(
    s_dim=s_dim,
    x_dim=x_dim,
    h_dim=h_dim,
    gammaM_start=gammaM_start,
    gammaM_stop=gammaM_stop,
    gammaW_start=gammaW_start,
    gammaW_stop=gammaW_stop,
    beta=beta,
    zeta=zeta,
    muD=muD,
    WScalings=WScalings,
    DScalings=LayerGains,
    LayerMinimumGains=LayerMinimumGains,
    LayerMaximumGains=LayerMaximumGains,
    neural_OUTPUT_COMP_TOL=OUTPUT_COMP_TOL,
    set_ground_truth=True,
    S=S,
    A=A,
)

model.fit_batch_nnsparse(
    X,
    n_epochs=1,
    neural_lr_start=0.5,
    neural_lr_stop=0.2,
    neural_fast_start=True,
    synaptic_lr_decay_divider=1,
    debug_iteration_point=debug_iteration_point,
    plot_in_jupyter=True,
)

# %% [markdown]
# Visualize SNR Convergence of Each Source Component

# %% [code]
mpl.rcParams["xtick.labelsize"] = 18
mpl.rcParams["ytick.labelsize"] = 18
plot_convergence_plot(
    model.SNR_list,
    xlabel="Number of Iterations / {}".format(debug_iteration_point),
    ylabel="SINR (dB)",
    title="SINR Convergence Plot",
    colorcode=None,
    linewidth=1.8,
)

# %% [markdown]
# Calculate Resulting Component SNRs and Overall SINR

# %% [code]
Wf = model.compute_overall_mapping(return_mapping=True)
Y = Wf @ X
Y_ = signed_and_permutation_corrected_sources(S, Y)
coef_ = ((Y_ * S).sum(axis=1) / (Y_ * Y_).sum(axis=1)).reshape(-1, 1)
Y_ = coef_ * Y_

print("Component SNR Values : {}\n".format(snr_jit(S, Y_)))

SINRwsm = 10 * np.log10(CalculateSINRjit(Y_, S)[0])

print("Overall SINR : {}".format(SINRwsm))

# %% [code]
Szeromean = S - S.mean(axis=1).reshape(-1, 1)
Wf = model.compute_overall_mapping(return_mapping=True)
Y_ = Wf @ X
Yzeromean = Y_ - Y_.mean(axis=1).reshape(-1, 1)
Y_ = model.signed_and_permutation_corrected_sources(Szeromean, Yzeromean)
coef_ = ((Y_ * Szeromean).sum(axis=1) / (Y_ * Y_).sum(axis=1)).reshape(-1, 1)
Y_ = coef_ * Y_

print("Component SNR Values : {}\n".format(snr_jit(Szeromean, Y_)))

SINRwsm = 10 * np.log10(CalculateSINRjit(Y_, Szeromean)[0])

print("Overall SINR : {}".format(SINRwsm))

# %% [markdown]
# Vizualize Extracted Signals Compared to Original Sources

# %% [code]
subplot_1D_signals(
    Y_[:, 0:100],
    title="Extracted Signals (Sign and Permutation Corrected)",
    figsize=(15.2, 9),
    colorcode=None,
)
subplot_1D_signals(
    S[:, 0:100], title="Original Signals", figsize=(15.2, 9), colorcode=None
)

# %% [code]
# import mir_eval

# %% [code]
# S.shape, Y_.shape

# %% [code]
# mir_eval.separation.bss_eval_sources(S, Y_, compute_permutation=True)
