# Supplementary material
Source: ML conference proceedings conference paper supplement (https://proceedings.neurips.cc/paper_files/paper/2022/hash/58cb483be90d31f9afea3a9e992a2abe-Abstract.html)
Supplement: Supplementary file 1 [file 58cb483be90d31f9afea3a9e992a2abe-Supplemental-Conference.zip › biologically_plausible_determi-Supplementary Material/Codes/Biologically-Plausible-DetMaxNNs-for-Blind-Source-Separation-main/Notebook_Examples/Notebook_Experiments_WSM/WSM_Simplex_Independent_Demo.ipynb]

# %% [markdown]
# Import Required Libraries

# %% [code]
import sys

sys.path.insert(0, "../../src")
import numpy as np
import matplotlib.pyplot as plt
from IPython import display
import pylab as pl

from WSMBSS import *
from general_utils import *
from visualization_utils import *

import warnings

warnings.filterwarnings("ignore")
# np.random.seed(100)
# %load_ext autoreload
# %autoreload 2
notebook_name = "Simplex"

# %% [markdown]
# Source Generation and Mixing Scenario

# %% [code]
NumberofSources = 5
NumberofMixtures = 10
N = 500000
# https://stackoverflow.com/questions/65154622/sample-uniformly-at-random-from-a-simplex-in-python
S = np.random.exponential(scale=1.0, size=(NumberofSources, int(N)))
S = S / np.sum(S, axis=0)

SNR = 30
A = np.random.randn(NumberofMixtures, NumberofSources)
X = np.dot(A, S)

Xnoisy, NoisePart = addWGN(X, SNR, return_noise=True)

SNRinp = 10 * np.log10(
    np.sum(np.mean((Xnoisy - NoisePart) ** 2, axis=1))
    / np.sum(np.mean(NoisePart**2, axis=1))
)
print("The following is the mixture matrix A")
display_matrix(A)
print("Input SNR is : {}".format(SNRinp))

plt.scatter(S[0, :], S[2, :])
plt.show()

# %% [markdown]
# Visualize Generated Sources and Mixtures

# %% [code]
subplot_1D_signals(
    S[:, 0:100], title="Original Signals", figsize=(15.2, 9), colorcode=None
)
subplot_1D_signals(
    X[:, 0:100], title="Mixture Signals", figsize=(15, 18), colorcode=None
)

# %% [markdown]
# Algorithm Hyperparameter Selection and Weight Initialization

# %% [code]
MUS = 0.15
gammaM_start = [MUS, MUS]
gammaM_stop = [1e-3, 1e-3]
gammaW_start = [MUS, MUS]
gammaW_stop = [1e-3, 1e-3]

OUTPUT_COMP_TOL = 1e-5
MAX_OUT_ITERATIONS = 3000
LayerGains = [1, 1]
LayerMinimumGains = [1, 1]
LayerMaximumGains = [1e6, 1.001]
WScalings = [0.0033, 0.0033]
GamScalings = [1, 1]
zeta = 1e-4
beta = 0.5
muD = [20, 1e-2]

s_dim = S.shape[0]
x_dim = X.shape[0]
h_dim = s_dim
samples = S.shape[1]
# W_HX = np.eye(h_dim, x_dim)
# W_YH = np.eye(s_dim, h_dim)

# OPTIONS FOR synaptic_lr_rule: "constant", "divide_by_log_index", "divide_by_index"
synaptic_lr_rule = "divide_by_log_index"
# OPTIONS FOR neural_loop_lr_rule: "constant", "divide_by_loop_index", "divide_by_slow_loop_index"
neural_loop_lr_rule = "divide_by_slow_loop_index"
synaptic_lr_decay_divider = 1
neural_lr_decay_multiplier = 0.005
hidden_layer_gain = 100

# %% [markdown]
# Run WSM Algorithm on Mixture Signals

# %% [code]
WSM_INPUT_STD = 0.5
XnoisyWSM = (WSM_INPUT_STD * (Xnoisy / Xnoisy.std(1)[:,np.newaxis]))
debug_iteration_point = 25000

model = OnlineWSMBSS(
                        s_dim=s_dim,
                        x_dim=x_dim,
                        h_dim=h_dim,
                        gammaM_start=gammaM_start,
                        gammaM_stop=gammaM_stop,
                        gammaW_start=gammaW_start,
                        gammaW_stop=gammaW_stop,
                        beta=beta,
                        zeta=zeta,
                        muD=muD,
                        WScalings=WScalings,
#                         W_HX=W_HX,
#                         W_YH=W_YH,
                        DScalings=LayerGains,
                        LayerMinimumGains=LayerMinimumGains,
                        LayerMaximumGains=LayerMaximumGains,
                        neural_OUTPUT_COMP_TOL=OUTPUT_COMP_TOL,
                        set_ground_truth=True,
                        S=S,
                        A=A,
                    )

model.fit_batch_simplex(
                            XnoisyWSM,
                            n_epochs=1,
                            neural_lr_start=0.3,
                            neural_lr_stop=0.2,
                            stlambd_lr=0.1,
#                             use_previous_stlambd=True,
                            synaptic_lr_rule=synaptic_lr_rule,
                            neural_loop_lr_rule=neural_loop_lr_rule,
                            neural_fast_start=True,
                            synaptic_lr_decay_divider=synaptic_lr_decay_divider,
                            neural_lr_decay_multiplier=neural_lr_decay_multiplier,
                            hidden_layer_gain=hidden_layer_gain,
                            debug_iteration_point=debug_iteration_point,
                            shuffle=False,
                            plot_in_jupyter=True,
                        )

# %% [markdown]
# Visualize SNR Convergence of Each Source Component

# %% [code]
mpl.rcParams["xtick.labelsize"] = 18
mpl.rcParams["ytick.labelsize"] = 18
plot_convergence_plot(
    model.SNR_list,
    xlabel="Number of Iterations / {}".format(debug_iteration_point),
    ylabel="SINR (dB)",
    title="SINR Convergence Plot",
    colorcode=None,
    linewidth=1.8,
)

# %% [markdown]
# Calculate Resulting Component SNRs and Overall SINR

# %% [code]
# Wf = model.compute_overall_mapping(return_mapping=True)
# Y_ = Wf @ XnoisyWSM
# Y_ = model.signed_and_permutation_corrected_sources(S, Y_)
# coef_ = ((Y_ * S).sum(axis=1) / (Y_ * Y_).sum(axis=1)).reshape(-1, 1)
# Y_ = coef_ * Y_

# print("Component SNR Values : {}\n".format(snr_jit(S, Y_)))

# SINRwsm = 10 * np.log10(CalculateSINRjit(Y_, S, False)[0])

# print("Overall SINR : {}".format(SINRwsm))

# %% [code]
Szeromean = S - S.mean(axis=1).reshape(-1, 1)
Wf = model.compute_overall_mapping(return_mapping=True)
Y_ = Wf @ XnoisyWSM
Yzeromean = Y_ - Y_.mean(axis=1).reshape(-1, 1)
Y_ = model.signed_and_permutation_corrected_sources(Szeromean, Yzeromean)
coef_ = ((Y_ * Szeromean).sum(axis=1) / (Y_ * Y_).sum(axis=1)).reshape(-1, 1)
Y_ = coef_ * Y_

print("Component SNR Values : {}\n".format(snr_jit(Szeromean, Y_)))

SINRwsm = 10 * np.log10(CalculateSINRjit(Y_, Szeromean, False)[0])

print("Overall SINR : {}".format(SINRwsm))

# %% [markdown]
# Vizualize Extracted Signals Compared to Original Sources

# %% [code]
k = 2500
subplot_1D_signals(
    Y_[:, k : k + 100],
    title="Extracted Signals (Sign and Permutation Corrected)",
    figsize=(15.2, 9),
    colorcode=None,
)
subplot_1D_signals(
    S[:, k : k + 100], title="Original Signals", figsize=(15.2, 9), colorcode=None
)

# %% [code]
import mir_eval

# %% [code]
S.shape, Y_.shape

# %% [code]
mir_eval.separation.bss_eval_sources(S, Y_, compute_permutation=True)
