# Supplementary material
Source: ML conference proceedings conference paper supplement (https://proceedings.neurips.cc/paper_files/paper/2022/hash/58cb483be90d31f9afea3a9e992a2abe-Abstract.html)
Supplement: Supplementary file 1 [file 58cb483be90d31f9afea3a9e992a2abe-Supplemental-Conference.zip › biologically_plausible_determi-Supplementary Material/Codes/Biologically-Plausible-DetMaxNNs-for-Blind-Source-Separation-main/oldscripts/Codes/NumericalExperiments/SimulationsForPaper/README2.md]

In this folder, each subfolder includes our simulation codes for each source domain assumption. There might be multiple scripts starting with the same name such as "simulation_noisy_sparseV1.py" and "simulation_noisy_sparseV2.py". These scripts are exactly the same code except that they use different seeds for simulations. We use multiple scripts to obtain more results for the experiments.
