# Supplementary material
Source: ML conference proceedings conference paper supplement (https://proceedings.neurips.cc/paper_files/paper/2022/hash/58cb483be90d31f9afea3a9e992a2abe-Abstract.html)
Supplement: Supplementary file 1 [file 58cb483be90d31f9afea3a9e992a2abe-Supplemental-Conference.zip › biologically_plausible_determi-Supplementary Material/Codes/Biologically-Plausible-DetMaxNNs-for-Blind-Source-Separation-main/oldscripts/Codes/src/utils.py]

import numpy as np
import scipy
import math
from scipy.stats import invgamma, chi2, t
from scipy import linalg
import matplotlib.pyplot as plt
from matplotlib.pyplot import plot, draw, show
import matplotlib as mpl
from tqdm import tqdm
from numba import njit, jit
import mne
from mne.preprocessing import ICA
import logging
from time import time
import os
from IPython.display import display, Latex, Math, clear_output
import pylab as pl
from scipy.spatial import Delaunay
from scipy.spatial import ConvexHull  
from numpy.linalg import det
from scipy.stats import dirichlet
import itertools
import pypoman

############################ UTILITY FUNCTIONS ######################################

def whiten_signal(X, mean_normalize = True, type_ = 3):
    """
    Input : X  ---> Input signal to be whitened
    
    type_ : Defines the type for preprocesing matrix. type_ = 1 and 2 uses eigenvalue decomposition whereas type_ = 3 uses SVD.
    
    Output: X_white  ---> Whitened signal, i.e., X_white = W_pre @ X where W_pre = (R_x^0.5)^+ (square root of sample correlation matrix)
    """
    if mean_normalize:
        X = X - np.mean(X,axis = 0, keepdims = True)
    
    cov = np.cov(X.T)
    
    if type_ == 3: # Whitening using singular value decomposition
        U,S,V = np.linalg.svd(cov)
        d = np.diag(1.0 / np.sqrt(S))
        W_pre = np.dot(U, np.dot(d, U.T))
        
    else: # Whitening using eigenvalue decomposition
        d,S = np.linalg.eigh(cov)
        D = np.diag(d)

        D_sqrt = np.sqrt(D * (D>0))

        if type_ == 1: # Type defines how you want W_pre matrix to be
            W_pre = np.linalg.pinv(S@D_sqrt)
        elif type_ == 2:
            W_pre = np.linalg.pinv(S@D_sqrt@S.T)
    
    X_white = (W_pre @ X.T).T
    
    return X_white, W_pre

def whiten_input(X, n_components = None, return_prewhitening_matrix = False):
    """
    X.shape[0] = Number of sources
    X.shape[1] = Number of samples for each signal
    """
    x_dim = X.shape[0]
    if n_components is None:
        n_components = x_dim
    s_dim = n_components
    
    N = X.shape[1]
    # Mean of the mixtures
    mX = np.mean(X, axis = 1).reshape((x_dim, 1))
    # Covariance of Mixtures
    Rxx = np.dot(X, X.T)/N - np.dot(mX, mX.T)
    # Eigenvalue Decomposition
    d, V = np.linalg.eig(Rxx)
    D = np.diag(d)
    # Sorting indexis for eigenvalues from large to small
    ie = np.argsort(-d)
    # Inverse square root of eigenvalues
    ddinv = 1/np.sqrt(d[ie[:s_dim]])
    # Pre-whitening matrix
    Wpre = np.dot(np.diag(ddinv), V[:, ie[:s_dim]].T)#*np.sqrt(12)
    # Whitened mixtures
    H = np.dot(Wpre, X)
    if return_prewhitening_matrix:
        return H, Wpre
    else:
        return H

def ZeroOneNormalizeData(data):
    return (data - np.min(data)) / (np.max(data) - np.min(data))

def ZeroOneNormalizeColumns(X):
    X_normalized = np.empty_like(X)
    for i in range(X.shape[1]):
        X_normalized[:,i] = ZeroOneNormalizeData(X[:,i])

    return X_normalized

def ProjectOntoLInfty(X):
    return X*(X>=-1.0)*(X<=1.0)+(X>1.0)*1.0-1.0*(X<-1.0)

def Subplot_gray_images(I, image_shape = [512,512], height = 15, width = 15, title = ''):
    n_images = I.shape[1]
    fig, ax = plt.subplots(1,n_images)
    fig.suptitle(title)
    fig.set_figheight(height)
    fig.set_figwidth(width)
    for i in range(n_images):
        ax[i].imshow(I[:,i].reshape(image_shape[0],image_shape[1]), cmap = 'gray')
    
    plt.show()

def subplot_1D_signals(X, title = '',title_fontsize = 20, figsize = (10,5), linewidth = 1, colorcode = '#050C12'):
    """
    Plot the 1D signals (each column from the given matrix)
    """
    n = X.shape[1] # Number of signals
    
    fig, ax = plt.subplots(n,1, figsize = figsize)
    
    for i in range(n):
        ax[i].plot(X[:,i], linewidth = linewidth, color = colorcode)
        ax[i].grid()
    
    plt.suptitle(title, fontsize = title_fontsize)
    # plt.rc('xtick', labelsize=15)    # fontsize of the tick labels
    # plt.rc('ytick', labelsize=15)    # fontsize of the tick labels
    plt.draw()

def plot_convergence_plot(metric, xlabel = '', ylabel = '', title = '', figsize = (12,8), fontsize = 15, linewidth = 3, colorcode = '#050C12'):
    
    plt.figure(figsize = figsize)
    plt.plot(metric, linewidth = linewidth, color = colorcode)
    plt.xlabel(xlabel, fontsize = fontsize)
    plt.ylabel(ylabel, fontsize = fontsize)
    plt.title(title, fontsize = fontsize)
    # plt.rc('xtick', labelsize=20)    # fontsize of the tick labels
    # plt.rc('ytick', labelsize=20)    # fontsize of the tick labels
    plt.grid()
    plt.draw()
    
def outer_prod_broadcasting(A, B):
    """Broadcasting trick"""
    return A[...,None]*B[:,None]

def find_permutation_between_source_and_estimation(S,Y):
    """
    S    : Original source matrix
    Y    : Matrix of estimations of sources (after BSS or ICA algorithm)
    
    return the permutation of the source seperation algorithm
    """
    
    # perm = np.argmax(np.abs(np.corrcoef(S.T,Y.T) - np.eye(2*S.shape[1])),axis = 0)[S.shape[1]:]
    # perm = np.argmax(np.abs(np.corrcoef(Y.T,S.T) - np.eye(2*S.shape[1])),axis = 0)[S.shape[1]:]
    perm = np.argmax(np.abs(outer_prod_broadcasting(Y,S).sum(axis = 0))/(np.linalg.norm(S,axis = 0)*np.linalg.norm(Y,axis=0)), axis = 0)
    return perm

def signed_and_permutation_corrected_sources(S,Y):
    perm = find_permutation_between_source_and_estimation(S,Y)
    return np.sign((Y[:,perm] * S).sum(axis = 0)) * Y[:,perm]

def psnr(img1, img2, pixel_max = 1):
    """
    Return peak-signal-to-noise-ratio between given two images
    """
    mse = np.mean( (img1 - img2) ** 2 )
    if mse == 0:
        return 100
    else:
        return 20 * np.log10(pixel_max / np.sqrt(mse))

def snr(S_original, S_noisy):
    N_hat = S_original - S_noisy
    N_P = (N_hat ** 2).sum(axis = 0)
    S_P = (S_original ** 2).sum(axis = 0)
    snr = 10 * np.log10(S_P / N_P)
    return snr

def ProjectRowstoL1NormBall(H):
    Hshape=H.shape
    #lr=np.ones((Hshape[0],1))@np.reshape((1/np.linspace(1,Hshape[1],Hshape[1])),(1,Hshape[1]))
    lr=np.tile(np.reshape((1/np.linspace(1,Hshape[1],Hshape[1])),(1,Hshape[1])),(Hshape[0],1))
    #Hnorm1=np.reshape(np.sum(np.abs(self.H),axis=1),(Hshape[0],1))

    u=-np.sort(-np.abs(H),axis=1)
    sv=np.cumsum(u,axis=1)
    q=np.where(u>((sv-1)*lr),np.tile(np.reshape((np.linspace(1,Hshape[1],Hshape[1])-1),(1,Hshape[1])),(Hshape[0],1)),np.zeros((Hshape[0],Hshape[1])))
    rho=np.max(q,axis=1)
    rho=rho.astype(int)
    lindex=np.linspace(1,Hshape[0],Hshape[0])-1
    lindex=lindex.astype(int)
    theta=np.maximum(0,np.reshape((sv[tuple([lindex,rho])]-1)/(rho+1),(Hshape[0],1)))
    ww=np.abs(H)-theta
    H=np.sign(H)*(ww>0)*ww
    return H

def display_matrix(array):
    data = ''
    for line in array:
        if len(line) == 1:
            data += ' %.3f &' % line + r' \\\n'
            continue
        for element in line:
            data += ' %.3f &' % element
        data += r' \\' + '\n'
    display(Math('\\begin{bmatrix} \n%s\end{bmatrix}' % data))

# Calculate SIR Function
def CalculateSIR(H,pH, return_db = True):
    G=pH@H
    Gmax=np.diag(np.max(abs(G),axis=1))
    P=1.0*((np.linalg.inv((Gmax))@np.abs(G))>0.99)
    T=G@P.T
    rankP=np.linalg.matrix_rank(P)
    diagT = np.diag(T)
    # Signal Power
    sigpow = np.linalg.norm(diagT,2)**2
    # Interference Power
    intpow = np.linalg.norm(T,'fro')**2 - sigpow
    SIRV = sigpow/intpow
    # SIRV=np.linalg.norm((np.diag(T)))**2/(np.linalg.norm(T,'fro')**2-np.linalg.norm(np.diag(T))**2)
    if return_db:
        SIRV = 10*np.log10(sigpow/intpow)

    return SIRV,rankP

def CalculateSINR(Out,S, compute_permutation = True):
    r=S.shape[0]
    if compute_permutation:
        G=np.dot(Out-np.reshape(np.mean(Out,1),(r,1)),np.linalg.pinv(S-np.reshape(np.mean(S,1),(r,1))))
        indmax=np.argmax(np.abs(G),1)
    else:
        G=np.dot(Out-np.reshape(np.mean(Out,1),(r,1)),np.linalg.pinv(S-np.reshape(np.mean(S,1),(r,1))))
        indmax = np.arange(0,r)
    GG=np.zeros((r,r))
    for kk in range(r):
        GG[kk,indmax[kk]]=np.dot(Out[kk,:]-np.mean(Out[kk,:]),S[indmax[kk],:].T-np.mean(S[indmax[kk],:]))/np.dot(S[indmax[kk],:]-np.mean(S[indmax[kk],:]),S[indmax[kk],:].T-np.mean(S[indmax[kk],:]))#(G[kk,indmax[kk]])
    ZZ=GG@(S-np.reshape(np.mean(S,1),(r,1)))+np.reshape(np.mean(Out,1),(r,1))
    E=Out-ZZ
    MSE=np.linalg.norm(E,'fro')**2
    SigPow=np.linalg.norm(ZZ,'fro')**2
    SINR=(SigPow/MSE)
    return SINR,SigPow,MSE,G
    
def addWGN(signal, SNR, return_noise = False, print_resulting_SNR = False):
    """
    Adding white Gaussian Noise to the input signal
    signal              : Input signal, numpy array of shape (number of sources, number of samples)
                          If your signal is a 1D numpy array of shape (number of samples, ), then reshape it 
                          by signal.reshape(1,-1) before giving it as input to this function
    SNR                 : Desired input signal to noise ratio
    print_resulting_SNR : If you want to print the numerically calculated SNR, pass it as True
    
    Returns
    ============================
    signal_noisy        : Output signal which is the sum of input signal and additive noise
    noise               : Returns the added noise
    """
    sigpow = np.mean(signal**2, axis = 1)
    noisepow = 10 **(-SNR/10) * sigpow
    noise =  np.sqrt(noisepow)[:,np.newaxis] * np.random.randn(signal.shape[0], signal.shape[1])
    signal_noisy = signal + noise
    if print_resulting_SNR:
        SNRinp = 10 * np.log10(np.sum(np.mean(signal**2, axis = 1)) / np.sum(np.mean(noise**2, axis = 1)))
        print("Input SNR is : {}".format(SNRinp))
    if return_noise:
        return signal_noisy, noise
    else:
        return signal_noisy

def WSM_Mixing_Scenario(S, NumberofMixtures = None, INPUT_STD = None):
    NumberofSources = S.shape[0]
    if INPUT_STD is None:
        INPUT_STD = S.std()
    if NumberofMixtures is None:
        NumberofMixtures = NumberofSources
    A = np.random.standard_normal(size=(NumberofMixtures,NumberofSources))
    X = A @ S
    for M in range(A.shape[0]):
        stdx = np.std(X[M,:])
        A[M,:] = A[M,:]/stdx * INPUT_STD
    X = A @ S
    return A, X

def generate_correlated_uniform_sources(R, range_ = [-1,1], n_sources = 5, size_sources = 500000):
    """
    R : correlation matrix
    """
    assert R.shape[0] == n_sources, "The shape of correlation matrix must be equal to the number of sources, which is entered as (%d)" % (n_sources)
    S = np.random.uniform(range_[0], range_[1], size = (n_sources, size_sources))
    L = np.linalg.cholesky(R)
    S_ = L @ S
    return S_

def generate_correlated_copula_sources(rho = 0.0, df = 4, n_sources = 5, size_sources = 500000, decreasing_correlation = True):
    """
    rho     : correlation parameter
    df      : degrees for freedom

    required libraries:
    from scipy.stats import invgamma, chi2, t
    from scipy import linalg
    import numpy as np
    """
    if decreasing_correlation:
        first_row = np.array([rho ** j for j in range(n_sources)])
        calib_correl_matrix = linalg.toeplitz(first_row, first_row)
    else:
        calib_correl_matrix = np.eye(n_sources) * (1 - rho) + np.ones((n_sources, n_sources)) * rho

    mu = np.zeros(len(calib_correl_matrix))
    s = chi2.rvs(df, size = size_sources)[:, np.newaxis]
    Z = np.random.multivariate_normal(mu, calib_correl_matrix, size_sources)
    X = np.sqrt(df/s) * Z # chi-square method
    S = t.cdf(X, df).T
    return S

def generate_uniform_points_in_polytope(polytope_vertices, size):
    """"
    polytope_vertices : vertex matrix of shape (n_dim, n_vertices)

    return:
        Samples of shape (n_dim, size)
    """
    polytope_vertices = polytope_vertices.T
    dims = polytope_vertices.shape[-1]
    hull = polytope_vertices[ConvexHull(polytope_vertices).vertices]
    deln = hull[Delaunay(hull).simplices]

    vols = np.abs(det(deln[:, :dims, :] - deln[:, dims:, :])) / np.math.factorial(dims)    
    sample = np.random.choice(len(vols), size = size, p = vols / vols.sum())

    return np.einsum('ijk, ij -> ik', deln[sample], dirichlet.rvs([1]*(dims + 1), size = size)).T

def generate_practical_polytope(dim, antisparse_dims, nonnegative_dims, relative_sparse_dims_list):
    A = []
    b = []
    for j in antisparse_dims:
        row1 = [0 for _ in range(dim)]
        row2 = row1.copy()
        row1[j] = 1
        A.append(row1)
        b.append(1)
        row2[j] = -1
        A.append(row2)
        b.append(1)

    for j in nonnegative_dims:
        row1 = [0 for _ in range(dim)]
        row2 = row1.copy()
        row1[j] = 1
        A.append(row1)
        b.append(1)
        row2[j] = -1
        A.append(row2)
        b.append(0)

    for relative_sparse_dims in relative_sparse_dims_list:
        row = np.zeros(dim)
        pm_one = [[1,-1] for _ in range(relative_sparse_dims.shape[0])]
        for i in itertools.product(*pm_one):
            row_copy = row.copy()
            row_copy[relative_sparse_dims] = i
            A.append(list(row_copy))
            b.append(1)
    A = np.array(A)
    b = np.array(b)
    vertices = pypoman.compute_polytope_vertices(A, b)
    V = np.array([list(v) for v in vertices]).T
    return (A,b), V
