# Supplementary material
Source: ML conference proceedings conference paper supplement (https://proceedings.neurips.cc/paper_files/paper/2022/hash/58cb483be90d31f9afea3a9e992a2abe-Abstract.html)
Supplement: Supplementary file 1 [file 58cb483be90d31f9afea3a9e992a2abe-Supplemental-Conference.zip › biologically_plausible_determi-Supplementary Material/Codes/Biologically-Plausible-DetMaxNNs-for-Blind-Source-Separation-main/requirements.txt]

numpy==1.22.4
pandas==1.3.5
scipy==1.7.3
numba==0.55.2
mne==0.24.1
matplotlib==3.5.1
matplotlib-inline==0.1.3
opencv-python==4.5.5.64
tqdm==4.62.3
scikit-image==0.19.2
scikit-learn==1.1.1
pypoman==0.5.4
sympy==1.10.1
networkx==2.8
