# Supplementary material
Source: ML conference proceedings conference paper supplement (https://proceedings.neurips.cc/paper_files/paper/2022/hash/58cb483be90d31f9afea3a9e992a2abe-Abstract.html)
Supplement: Supplementary file 1 [file 58cb483be90d31f9afea3a9e992a2abe-Supplemental-Conference.zip › biologically_plausible_determi-Supplementary Material/Codes/Biologically-Plausible-DetMaxNNs-for-Blind-Source-Separation-main/Simulations/AnalyzeSimulationResults/PlotSimulationResults_Antisparse.ipynb]

# %% [code]
import sys
sys.path.insert(0, '../Results')
sys.path.insert(0, '../../src')
import pandas as pd
import numpy as np
import matplotlib.pyplot as plt
import pickle
import os
from visualization_utils import perc, SetPlotRC, ApplyFont

# %% [markdown]
# (Signed) Antisparse Correlated ($[1 \quad \rho \quad \rho^2 \quad \rho^3]$)

# %% [code]
df_anti_results1 = pd.read_pickle(r"../Results/simulation_results_correlated_antisparseV3.pkl")[['Model','rho', 'SINR']]
df_anti_results2 = pd.read_pickle(r"../Results/simulation_results_correlated_antisparseV4.pkl")[['Model','rho', 'SINR']]
df_anti_results3 = pd.read_pickle(r"../Results/simulation_results_correlated_antisparseV5.pkl")[['Model','rho', 'SINR']]
df_anti_results = pd.concat([df_anti_results1,df_anti_results2, df_anti_results3], axis = 0)
# print('Shape : {}'.format(df_anti_results.shape))
print('Number of diverge cases for WSM is : ', df_anti_results.loc[(df_anti_results['SINR'] == -999) & (df_anti_results['Model'] == 'WSM')].shape[0])

df_anti_results = df_anti_results.loc[df_anti_results['SINR'] != -999]
results = df_anti_results[['Model', 'rho', 'SINR']].groupby(['Model', 'rho']).agg({'rho':'size', 'SINR':'mean'}).rename(columns={'rho':'count','SINR':'SINR'}).reset_index()
table = pd.DataFrame(columns = (["rho"] + list(df_anti_results['Model'].unique())))
table['rho'] = np.array([0.1*j for j in range(9)])
for m in list(table.columns[1:]):
    table[m] = results.loc[results['Model'] == m]['SINR'].values
    
table

# %% [code]
SetPlotRC()

SINRWSM = results.loc[results['Model'] == 'WSM']['SINR'].to_numpy()
SINRIca = results.loc[results['Model'] == 'ICA']['SINR'].to_numpy()
SINRBSM = results.loc[results['Model'] == 'BSM']['SINR'].to_numpy()
SINRLDMI = results.loc[results['Model'] == 'LDMI']['SINR'].to_numpy()
SINRPMF = results.loc[results['Model'] == 'PMF']['SINR'].to_numpy()
rholist = [0.0, 0.1, 0.2, 0.3, 0.4, 0.5, 0.6, 0.7, 0.8]
fh2=plt.figure(figsize=(10, 6), dpi=80)

plt.plot(rholist,SINRWSM,'-', linewidth=4, label = "WSM")
plt.plot(rholist,SINRIca,'g--',linewidth=4, label = "ICA-Infomax")
plt.plot(rholist,SINRBSM,'b--',linewidth=4, label = "BSM")
plt.plot(rholist[:7],SINRLDMI[:7],'k:',linewidth=6, label = "LD-InfoMax")
plt.plot(rholist,SINRPMF,'c:',linewidth=6, label = "PMF")
gh=plt.grid(linewidth=2)
plt.xticks(fontsize=20)
plt.yticks(fontsize=20)
plt.ylabel('SINR (dB)',fontsize=25)
plt.xlabel(r"$\rho$",fontsize=25)
plt.legend(loc='lower left',fontsize=15)
plt.axis([0.0,0.6,-0,37])
plt.title('Anti-sparse Source Separation SINR Results',fontsize=20)
ApplyFont(plt.gca())

# %% [code]
# results.loc[results['Model'] == 'WSM']

# %% [markdown]
# Nonnegative Antisparse Correlated ($[1 \quad \rho \quad \rho \quad \rho \quad \rho]$)

# %% [code]
df_nnanti_results1 = pd.read_pickle(r"../Results/simulation_results_correlated_nnantisparseV2.pkl")[['Model','rho', 'SINR']]
df_nnanti_results2 = pd.read_pickle(r"../Results/simulation_results_correlated_nnantisparseV3.pkl")[['Model','rho', 'SINR']]
df_nnanti_results3 = pd.read_pickle(r"../Results/simulation_results_correlated_nnantisparseV5.pkl")[['Model','rho', 'SINR']]
df_nnanti_results4 = pd.read_pickle(r"../Results/simulation_results_correlated_nnantisparseV8.pkl")[['Model','rho', 'SINR']]

df_nnanti_results = pd.concat([
                                df_nnanti_results1, 
                                df_nnanti_results2, 
                                df_nnanti_results3,
                                df_nnanti_results4
                              ], axis = 0)

# print('Shape : {}'.format(df_nnanti_results.shape))
# print('Number of diverge cases for WSM is : ', df_nnanti_results.loc[(df_nnanti_results['SINR'] == -999) & (df_nnanti_results['Model'] == 'WSM')].shape[0])

df_nnanti_results = df_nnanti_results.loc[df_nnanti_results['SINR'] != -999]
results = df_nnanti_results[['Model', 'rho', 'SINR']].groupby(['Model', 'rho']).agg({'rho':'size', 'SINR':'mean'}).rename(columns={'rho':'count','SINR':'SINR'}).reset_index()
table = pd.DataFrame(columns = (["rho"] + list(df_nnanti_results['Model'].unique())))
table['rho'] = np.array([0.1*j for j in range(9)])
for m in list(table.columns[1:]):
    table[m] = results.loc[results['Model'] == m]['SINR'].values
    
table

# %% [code]
# df_nnanti_results = pd.concat([
#                                df_nnanti_results1, 
#                                df_nnanti_results2, 
#                                df_nnanti_results3,
#                                df_nnanti_results4
#                               ],
#                               axis = 0)
# print('Shape : {}'.format(df_nnanti_results.shape))

# df_nnanti_results = df_nnanti_results.loc[df_nnanti_results['SINR'] != -999]
# results = df_nnanti_results[['Model', 'rho', 'SINR']].groupby(['Model', 'rho']).agg({'rho':'size', 'SINR':'mean'}).rename(columns={'rho':'count','SINR':'SINR'}).reset_index()

SetPlotRC()

SINRIca = results.loc[results['Model'] == 'ICA']['SINR'].to_numpy()
SINRNSM = results.loc[results['Model'] == 'NSM']['SINR'].to_numpy()
SINRLDMI = results.loc[results['Model'] == 'LDMI']['SINR'].to_numpy()
SINRPMF = results.loc[results['Model'] == 'PMF']['SINR'].to_numpy()
SINRWSM = results.loc[results['Model'] == 'WSM']['SINR'].to_numpy()

rholist = [0.0, 0.1, 0.2, 0.3, 0.4, 0.5, 0.6, 0.7, 0.8]
fh2=plt.figure(figsize=(10, 6), dpi=80)

plt.plot(rholist,SINRWSM,'-', linewidth=4, label = "WSM")
plt.plot(rholist,SINRIca,'g--',linewidth=4, label = "ICA-Infomax")
plt.plot(rholist,SINRNSM,'b--',linewidth=4, label = "NSM")
plt.plot(rholist,SINRLDMI,'k:',linewidth=6, label = "LD-InfoMax")
plt.plot(rholist,SINRPMF, 'c:', linewidth=6, label = "PMF")

gh=plt.grid(linewidth=2)
plt.xticks(fontsize=20)
plt.yticks(fontsize=20)
plt.ylabel('SINR (dB)',fontsize=25)
plt.xlabel(r"$\rho$",fontsize=25)
plt.legend(loc='lower left',fontsize=15)
plt.axis([0.0,0.8,-0,38])
plt.title('Nonnegative Anti-sparse Source Separation SINR Results',fontsize=20)
ApplyFont(plt.gca())
# plt.savefig('Figures/WSM_NNAntisparse_CorrelatedV2.pdf', format='pdf')

# %% [code]
