# Supplementary material
Source: ML conference proceedings conference paper supplement (https://proceedings.neurips.cc/paper_files/paper/2022/hash/58cb483be90d31f9afea3a9e992a2abe-Abstract.html)
Supplement: Supplementary file 1 [file 58cb483be90d31f9afea3a9e992a2abe-Supplemental-Conference.zip › biologically_plausible_determi-Supplementary Material/Codes/Biologically-Plausible-DetMaxNNs-for-Blind-Source-Separation-main/Simulations/ImageSeparation/ImageSeparationNSMandICA.ipynb]

# %% [code]
import numpy as np
import matplotlib.pyplot as plt
from matplotlib.pyplot import plot, draw, show, ion
import matplotlib.image as mpimg
import cv2
import scipy.io
from tqdm import tqdm

# from scipy.stats import ortho_group
import os
import sys
sys.path.append("../../src")
sys.path.append("../../data")

from NSMBSS import *
from ICA import fit_icainfomax
from general_utils import *
from visualization_utils import * 
from numba import njit
import warnings

warnings.filterwarnings("ignore")
np.random.seed(250)

# %% [code]
image_paths = '../../data/TestImages'
images = []
for im_dir in os.listdir(image_paths):
    try:
        images.append(mpimg.imread(os.path.join(image_paths,im_dir)))
    except:
        pass
images = np.array(images)

# %% [code]
small_images = np.zeros((images.shape[0],324* 432* 3))
small_to_large_image_size_ratio = 0.1
for i in range(images.shape[0]):
    small_img = cv2.resize(images[i], # original image
                           (0,0), # set fx and fy, not the final size
                           fx=small_to_large_image_size_ratio, 
                           fy=small_to_large_image_size_ratio, 
                           interpolation=cv2.INTER_NEAREST)
    if small_img.shape[0] == 302:
        small_img = cv2.resize(small_img, (0,0), fx = 432/403, fy = 324/302)
    print(small_img.shape)
    small_images[i] = small_img.reshape(-1,)/255

small_images.shape

# %% [code]
Subplot_RGB_images(small_images, imsize = [324,432], height = 4, width = 18)

# %% [code]
S = small_images[[2,0,1]]
Subplot_RGB_images(S, imsize = [324,432], height = 4, width = 18)
display_matrix(np.corrcoef(S))
# plt.savefig('Original_Images.pdf', format = 'pdf', dpi = 1500)

# %% [code]
np.random.seed(50)
NumberofMixtures = 5
NumberofSources = 3

INPUT_STD = 0.28

A, Xn = WSM_Mixing_Scenario(S, NumberofMixtures, INPUT_STD)

SNR=40
Noisecomp=np.random.randn(A.shape[0],S.shape[1])*np.power(10,-SNR/20)*INPUT_STD
X=Xn+Noisecomp

print('Input SNR : {}'.format(20*np.log10(np.std(Xn)/np.std(Noisecomp))))

X_ = ZeroOneNormalizeColumns(X.T).T
print('The following is the mixture matrix')
display_matrix(A)

# %% [code]
Subplot_RGB_images(X_, imsize = [324,432], height = 3, width = 18)
# plt.savefig('Mixture_Images.pdf', format = 'pdf', dpi = 1500)

# %% [markdown]
# NSM

# %% [code]
model = OnlineNSM(s_dim = NumberofSources, x_dim = NumberofMixtures, set_ground_truth = True, S = S, A = A)

# %% [code]
model.fit_batch_nsm(X = X, debug_iteration_point = 50000, plot_in_jupyter = False)

# %% [code]
Wf = model.compute_overall_mapping(return_mapping=True)
Y = Wf @ X
Y_ = signed_and_permutation_corrected_sources(S, Y)
coef_ = ((Y_ * S).sum(axis=1) / (Y_ * Y_).sum(axis=1)).reshape(-1, 1)
Y_ = coef_ * Y_

print("Component SNR Values : {}\n".format(snr_jit(S, Y_)))

SINRwsm = 10 * np.log10(CalculateSINRjit(Y_, S)[0])

print("Overall SINR : {}".format(SINRwsm))

# %% [code]
Subplot_RGB_images(ZeroOneNormalizeColumns(Y_.T).T, imsize = [324,432], height = 4, width = 18)

# %% [code]
Subplot_RGB_images(np.clip(Y_, 0,1), imsize = [324,432], height = 4, width = 18)

# %% [markdown]
# ICA

# %% [code]
Y = fit_icainfomax(
    X,
    NumberofSources)

# %% [code]
Y_ = signed_and_permutation_corrected_sources(S,Y)
coef_ = ((Y_ * S).sum(axis=1) / (Y_ * Y_).sum(axis=1)).reshape(-1, 1)
Y_ = coef_ * Y_
Y_ = ZeroOneNormalizeColumns(Y_.T).T
print("Component SNR Values : {}\n".format(snr_jit(S, Y_)))

SINRwsm = 10 * np.log10(CalculateSINRjit(Y_, S)[0])

print("Overall SINR : {}".format(SINRwsm))
