# Supplementary material
Source: ML conference proceedings conference paper supplement (https://proceedings.neurips.cc/paper_files/paper/2022/hash/58cb483be90d31f9afea3a9e992a2abe-Abstract.html)
Supplement: Supplementary file 1 [file 58cb483be90d31f9afea3a9e992a2abe-Supplemental-Conference.zip › biologically_plausible_determi-Supplementary Material/Codes/Biologically-Plausible-DetMaxNNs-for-Blind-Source-Separation-main/src/BSMBSS.py]

import matplotlib as mpl
import matplotlib.pyplot as plt
import numpy as np
import pylab as pl
from IPython.display import Latex, Math, clear_output, display
from numba import njit
from tqdm import tqdm

from bss_utils import *
##### IMPORT MY UTILITY SCRIPTS #######
from BSSbase import *
from dsp_utils import *
# from general_utils import *
from numba_utils import *

# from visualization_utils import *

mpl.rcParams["xtick.labelsize"] = 15
mpl.rcParams["ytick.labelsize"] = 15


class OnlineBSM(BSSBaseClass):
    """
    BOUNDED SIMILARITY MATCHING
    Implementation of online one layer Weighted Bounded Source Seperation Recurrent Neural Network.
    Reference: Alper T. Erdoğan and Cengiz Pehlevan, 'Blind Source Seperation Using Neural Networks with Local Learning Rules',ICASSP 2020

    Parameters:
    =================================
    s_dim          -- Dimension of the sources
    x_dim          -- Dimension of the mixtures
    W              -- Initial guess for forward weight matrix W, must be size of s_dim by x_dim
    M              -- Initial guess for lateral weight matrix M, must be size of s_dim by s_dim
    D              -- Initial guess for weight (similarity weights) matrix, must be size of s_dim by s_dim
    gamma          -- Forgetting factor for data snapshot matrix
    mu, beta       -- Similarity weight update parameters, check equation (15) from the paper

    Methods:
    ==================================

    whiten_signal(X)        -- Whiten the given batch signal X

    fit_next_antisparse(x_online)     -- Updates the network parameters for one data point x_online

    fit_batch_antisparse(X_batch)     -- Updates the network parameters for given batch data X_batch (but in online manner)

    """

    def __init__(
        self,
        s_dim,
        x_dim,
        gamma=0.9999,
        mu=1e-3,
        beta=1e-7,
        W=None,
        M=None,
        D=None,
        WScaling=0.0033,
        GamScaling=0.02,
        DScaling=1,
        whiten_input_=True,
        neural_OUTPUT_COMP_TOL=1e-6,
        set_ground_truth=False,
        S=None,
        A=None,
    ):

        if W is not None:
            if whiten_input_:
                assert W.shape == (s_dim, s_dim), (
                    "The shape of the initial guess W must be (s_dim,s_dim)=(%d,%d) (because of whitening)"
                    % (s_dim, x_dim)
                )
                W = W
            else:
                assert W.shape == (
                    s_dim,
                    x_dim,
                ), "The shape of the initial guess W must be (s_dim,x_dim)=(%d,%d)" % (
                    s_dim,
                    x_dim,
                )
                W = W
        else:
            if whiten_input_:
                W = np.random.randn(s_dim, s_dim)
                W = WScaling * (
                    W / np.sqrt(np.sum(np.abs(W) ** 2, axis=1)).reshape(s_dim, 1)
                )
            else:
                W = np.random.randn(s_dim, x_dim)
                W = WScaling * (
                    W / np.sqrt(np.sum(np.abs(W) ** 2, axis=1)).reshape(s_dim, 1)
                )

        if M is not None:
            assert M.shape == (
                s_dim,
                s_dim,
            ), "The shape of the initial guess W must be (s_dim,s_dim)=(%d,%d)" % (
                s_dim,
                s_dim,
            )
            M = M
        else:
            M = GamScaling * np.eye(s_dim)

        if D is not None:
            assert D.shape == (
                s_dim,
                1,
            ), "The shape of the initial guess D must be (s_dim,1)=(%d,%d)" % (s_dim, 1)
            D = D
        else:
            D = DScaling * np.ones((s_dim, 1))

        self.s_dim = s_dim
        self.x_dim = x_dim
        self.gamma = gamma
        self.mu = mu
        self.beta = beta
        self.W = W
        self.M = M
        self.D = D
        self.whiten_input_ = whiten_input_
        self.Wpre = np.eye(x_dim)
        self.neural_OUTPUT_COMP_TOL = neural_OUTPUT_COMP_TOL
        self.set_ground_truth = set_ground_truth
        if set_ground_truth:
            self.S = S
            self.A = A
        else:
            self.S = None
            self.A = None

        self.SIR_list = []
        self.SNR_list = []

    def whiten_input(self, X):
        x_dim = self.x_dim
        s_dim = self.s_dim
        N = X.shape[1]
        # Mean of the mixtures
        mX = np.mean(X, axis=1).reshape((x_dim, 1))
        # Covariance of Mixtures
        Rxx = np.dot(X, X.T) / N - np.dot(mX, mX.T)
        # Eigenvalue Decomposition
        d, V = np.linalg.eig(Rxx)
        D = np.diag(d)
        # Sorting indexis for eigenvalues from large to small
        ie = np.argsort(-d)
        # Inverse square root of eigenvalues
        ddinv = 1 / np.sqrt(d[ie[:s_dim]])
        # Pre-whitening matrix
        Wpre = np.dot(np.diag(ddinv), V[:, ie[:s_dim]].T)  # *np.sqrt(12)
        # Whitened mixtures
        H = np.dot(Wpre, X)
        self.Wpre = Wpre
        return H, Wpre

    def evaluate_for_debug(self, W, A, S, X, mean_normalize_estimation=False):
        s_dim = self.s_dim
        Y_ = W @ X
        if mean_normalize_estimation:
            Y_ = Y_ - Y_.mean(axis=1).reshape(-1, 1)
        Y_ = self.signed_and_permutation_corrected_sources(S, Y_)
        coef_ = ((Y_ * S).sum(axis=1) / (Y_ * Y_).sum(axis=1)).reshape(-1, 1)
        Y_ = coef_ * Y_

        SINR = 10 * np.log10(self.CalculateSINRjit(Y_, S, False)[0])
        SNR = self.snr_jit(S, Y_)

        T = W @ A
        Tabs = np.abs(T)
        P = np.zeros((s_dim, s_dim))

        for SourceIndex in range(s_dim):
            Tmax = np.max(Tabs[SourceIndex, :])
            Tabs[SourceIndex, :] = Tabs[SourceIndex, :] / Tmax
            P[SourceIndex, :] = Tabs[SourceIndex, :] > 0.999

        GG = P.T @ T
        _, SGG, _ = np.linalg.svd(
            GG
        )  # SGG is the singular values of overall matrix Wf @ A

        return SINR, SNR, SGG, Y_, P

    def plot_for_debug(self, SIR_list, SNR_list, P, debug_iteration_point, YforPlot):
        pl.clf()
        pl.subplot(2, 2, 1)
        pl.plot(np.array(SIR_list), linewidth=5)
        pl.xlabel("Number of Iterations / {}".format(debug_iteration_point), fontsize=45)
        pl.ylabel("SIR (dB)", fontsize=45)
        pl.title("SIR Behaviour", fontsize=45)
        pl.grid()
        pl.xticks(fontsize=45)
        pl.yticks(fontsize=45)

        pl.subplot(2, 2, 2)
        pl.plot(np.array(SNR_list), linewidth=5)
        pl.grid()
        pl.title("Component SNR Check", fontsize=45)
        pl.ylabel("SNR (dB)", fontsize=45)
        pl.xlabel("Number of Iterations / {}".format(debug_iteration_point), fontsize=45)
        pl.xticks(fontsize=45)
        pl.yticks(fontsize=45)

        pl.subplot(2, 2, 3)
        pl.plot(np.array(self.SV_list), linewidth=5)
        pl.grid()
        pl.title(
            "Singular Value Check, Overall Matrix Rank: "
            + str(np.linalg.matrix_rank(P)),
            fontsize=45,
        )
        pl.xlabel("Number of Iterations / {}".format(debug_iteration_point), fontsize=45)
        pl.xticks(fontsize=45)
        pl.yticks(fontsize=45)

        pl.subplot(2, 2, 4)
        pl.plot(YforPlot, linewidth=5)
        pl.title("Y last 25", fontsize=45)
        pl.grid()
        pl.xticks(fontsize=45)
        pl.yticks(fontsize=45)

        clear_output(wait=True)
        display(pl.gcf())

    @staticmethod
    @njit
    def update_weights_jit(x_current, y, W, M, D, gamma, beta, mu):
        # Synaptic & Similarity weight updates, follows from equations (12,13,14,15,16) from the paper
        W = (gamma**2) * W + (1 - gamma**2) * np.outer(y, x_current)
        M = (gamma**2) * M + (1 - gamma**2) * np.outer(y, y)
        # D = (1 - beta) * D + mu * np.diag(np.sum(np.abs(W)**2,axis = 1) - np.diag(M @ D @ M ))
        D = (1 - beta) * D + mu * (
            np.sum(np.abs(W) ** 2, axis=1) - np.sum((np.abs(M) ** 2) * D.T, axis=1)
        ).reshape(-1, 1)
        return W, M, D

    def compute_overall_mapping(self, return_mapping=True):
        W, M, D = self.W, self.M, self.D

        Wf = np.linalg.solve(M * D.T, W) @ self.Wpre
        # self.Wf = np.real(Wf)

        if return_mapping:
            return Wf
        else:
            return None

    @staticmethod
    @njit
    def run_neural_dynamics_antisparse(
        x,
        y,
        W,
        M,
        D,
        neural_dynamic_iterations=250,
        lr_start=0.1,
        lr_stop=1e-15,
        tol=1e-6,
        fast_start=False,
    ):
        def offdiag(A, return_diag=False):
            if return_diag:
                diag = np.diag(A)
                return A - np.diag(diag), diag
            else:
                return A - np.diag(diag)

        M_hat, Upsilon = offdiag(M, True)

        u = Upsilon * ((D.T * y)[0])
        mat_factor1 = M_hat * D.T
        mat_factor2 = Upsilon * D.T
        if fast_start:
            u = 0.99 * np.linalg.solve(M * D.T, W @ x)
            y = np.clip(u / mat_factor2[0], -1, 1)

        for j in range(neural_dynamic_iterations):
            lr = max(lr_start / (1 + j), lr_stop)
            yold = y
            du = -u + (W @ x - mat_factor1 @ y)
            u = u - lr * du
            # y = y - lr * du

            y = np.clip(u / mat_factor2[0], -1, 1)

            if np.linalg.norm(y - yold) < tol * np.linalg.norm(y):
                break
        return y

    @staticmethod
    @njit
    def run_neural_dynamics_nnantisparse(
        x,
        y,
        W,
        M,
        D,
        neural_dynamic_iterations=250,
        lr_start=0.1,
        lr_stop=1e-15,
        tol=1e-6,
        fast_start=False,
    ):
        def offdiag(A, return_diag=False):
            if return_diag:
                diag = np.diag(A)
                return A - np.diag(diag), diag
            else:
                return A - np.diag(diag)

        M_hat, Upsilon = offdiag(M, True)

        u = Upsilon * ((D.T * y)[0])
        mat_factor1 = M_hat * D.T
        mat_factor2 = Upsilon * D.T

        if fast_start:
            u = 0.99 * np.linalg.solve(M * D.T, W @ x)
            y = np.clip(u / mat_factor2[0], 0, 1)
            # y = np.clip(np.linalg.solve(M * D.T, W @ x), 0, 1)
        for j in range(neural_dynamic_iterations):
            lr = max(lr_start / (1 + j), lr_stop)
            yold = y
            du = -u + (W @ x - mat_factor1 @ y)
            # u = u - lr * du
            y = y - lr * du

            y = np.clip(u / mat_factor2[0], 0, 1)

            if np.linalg.norm(y - yold) < tol * np.linalg.norm(y):
                break

        return y

    def fit_next_antisparse(
        self,
        x_current,
        neural_dynamic_iterations=250,
        neural_lr_start=0.3,
        neural_lr_stop=1e-3,
        fast_start=False,
    ):
        W = self.W
        M = self.M
        D = self.D
        gamma, mu, beta = self.gamma, self.mu, self.beta
        neural_OUTPUT_COMP_TOL = self.neural_OUTPUT_COMP_TOL

        y = np.random.randn(
            self.s_dim,
        )
        y = self.run_neural_dynamics_antisparse(
            x_current,
            y,
            W,
            M,
            D,
            neural_dynamic_iterations,
            neural_lr_start,
            neural_lr_stop,
            neural_OUTPUT_COMP_TOL,
            fast_start,
        )

        W = (gamma**2) * W + (1 - gamma**2) * np.outer(y, x_current)
        M = (gamma**2) * M + (1 - gamma**2) * np.outer(y, y)

        D = (1 - beta) * D + mu * np.diag(
            np.sum(np.abs(W) ** 2, axis=1) - np.diag(M @ D @ M)
        )

        self.W = W
        self.M = M
        self.D = D

    def fit_batch_antisparse(
        self,
        X,
        n_epochs=1,
        shuffle=False,
        neural_dynamic_iterations=250,
        neural_lr_start=0.3,
        neural_lr_stop=1e-3,
        fast_start=False,
        debug_iteration_point=1000,
        plot_in_jupyter=False,
    ):

        gamma, mu, beta, W, M, D = (
            self.gamma,
            self.mu,
            self.beta,
            self.W,
            self.M,
            self.D,
        )
        neural_OUTPUT_COMP_TOL = self.neural_OUTPUT_COMP_TOL
        debugging = self.set_ground_truth
        SIR_list = self.SIR_list
        SNR_list = self.SNR_list
        self.SV_list = []
        whiten = self.whiten_input_

        if debugging:
            S = self.S
            A = self.A
            if plot_in_jupyter:
                plt.figure(figsize=(45, 30), dpi=80)
        else:
            S = None
            A = None

        assert X.shape[0] == self.x_dim, "You must input the transpose"

        samples = X.shape[1]

        Y = 0.05 * np.random.randn(self.s_dim, samples)

        if shuffle:
            idx = np.random.permutation(samples)  # random permutation
        else:
            idx = np.arange(samples)

        if whiten:
            X_white, W_pre = self.whiten_input(X)
            X_white = np.real(X_white)
            self.A = A
        else:
            X_white = X

        for k in range(n_epochs):
            for i_sample in tqdm(range(samples)):
                x_current = X_white[:, idx[i_sample]]  # Take one input
                y = Y[:, idx[i_sample]]

                # Upsilon = np.diag(np.diag(M)) # Following paragraph of equation (16)

                # Neural Dynamics: Equations (17) from the paper
                y = self.run_neural_dynamics_antisparse(
                    x_current,
                    y,
                    W,
                    M,
                    D,
                    neural_dynamic_iterations,
                    neural_lr_start,
                    neural_lr_stop,
                    neural_OUTPUT_COMP_TOL,
                    fast_start,
                )

                # Synaptic & Similarity weight updates, follows from equations (12,13,14,15,16) from the paper
                W, M, D = self.update_weights_jit(
                    x_current, y, W, M, D, gamma, beta, mu
                )

                # Record the seperated signal
                Y[:, idx[i_sample]] = y

                if debugging:
                    if (i_sample % debug_iteration_point) == 0:
                        try:
                            self.W = W
                            self.M = M
                            self.D = D

                            Wf = self.compute_overall_mapping(return_mapping=True)

                            SINR, SNR, SGG, Y_, P = self.evaluate_for_debug(
                                Wf, A, S, X, False
                            )
                            self.SV_list.append(abs(SGG))

                            SIR_list.append(SINR)
                            SNR_list.append(SNR)

                            self.SNR_list = SNR_list
                            self.SIR_list = SIR_list

                            if plot_in_jupyter:
                                YforPlot = Y[:, idx[i_sample - 25 : i_sample]].T
                                self.plot_for_debug(
                                    SIR_list,
                                    SNR_list,
                                    P,
                                    debug_iteration_point,
                                    YforPlot,
                                )
                        except Exception as e:
                            print(str(e))
        self.W = W
        self.M = M
        self.D = D

    def fit_batch_nnantisparse(
        self,
        X,
        n_epochs=1,
        shuffle=False,
        neural_dynamic_iterations=250,
        neural_lr_start=0.3,
        neural_lr_stop=1e-3,
        fast_start=False,
        debug_iteration_point=1000,
        plot_in_jupyter=False,
    ):
        gamma, mu, beta, W, M, D = (
            self.gamma,
            self.mu,
            self.beta,
            self.W,
            self.M,
            self.D,
        )
        neural_OUTPUT_COMP_TOL = self.neural_OUTPUT_COMP_TOL
        debugging = self.set_ground_truth
        SIR_list = self.SIR_list
        SNR_list = self.SNR_list
        self.SV_list = []
        whiten = self.whiten_input_

        if debugging:
            S = self.S
            A = self.A
            if plot_in_jupyter:
                plt.figure(figsize=(45, 30), dpi=80)
        else:
            S = None
            A = None

        assert X.shape[0] == self.x_dim, "You must input the transpose"

        samples = X.shape[1]

        Y = np.zeros((self.s_dim, samples))

        if shuffle:
            idx = np.random.permutation(samples)  # random permutation
        else:
            idx = np.arange(samples)

        if whiten:
            X_white, W_pre = self.whiten_input(X)
            X_white = np.real(X_white)
            self.A = A
        else:
            X_white = X

        for k in range(n_epochs):
            for i_sample in tqdm(range(samples)):
                x_current = X_white[:, idx[i_sample]]  # Take one input
                y = Y[:, idx[i_sample]]

                # Upsilon = np.diag(np.diag(M)) # Following paragraph of equation (16)

                # Neural Dynamics: Equations (17) from the paper
                y = self.run_neural_dynamics_nnantisparse(
                    x_current,
                    y,
                    W,
                    M,
                    D,
                    neural_dynamic_iterations,
                    neural_lr_start,
                    neural_lr_stop,
                    neural_OUTPUT_COMP_TOL,
                    fast_start,
                )

                # Synaptic & Similarity weight updates, follows from equations (12,13,14,15,16) from the paper
                W, M, D = self.update_weights_jit(
                    x_current, y, W, M, D, gamma, beta, mu
                )

                # Record the seperated signal
                Y[:, idx[i_sample]] = y

                if debugging:
                    if (i_sample % debug_iteration_point) == 0:
                        try:
                            self.W = W
                            self.M = M
                            self.D = D

                            Wf = self.compute_overall_mapping(return_mapping=True)

                            SINR, SNR, SGG, Y_, P = self.evaluate_for_debug(
                                Wf, A, S, X, False
                            )
                            self.SV_list.append(abs(SGG))

                            SIR_list.append(SINR)
                            SNR_list.append(SNR)

                            self.SNR_list = SNR_list
                            self.SIR_list = SIR_list

                            if plot_in_jupyter:
                                YforPlot = Y[:, idx[i_sample - 25 : i_sample]].T
                                self.plot_for_debug(
                                    SIR_list,
                                    SNR_list,
                                    P,
                                    debug_iteration_point,
                                    YforPlot,
                                )
                        except Exception as e:
                            print(str(e))
        self.W = W
        self.M = M
        self.D = D
