# Supplementary material
Source: ML conference proceedings conference paper supplement (https://proceedings.neurips.cc/paper_files/paper/2022/hash/58cb483be90d31f9afea3a9e992a2abe-Abstract.html)
Supplement: Supplementary file 1 [file 58cb483be90d31f9afea3a9e992a2abe-Supplemental-Conference.zip › biologically_plausible_determi-Supplementary Material/Codes/Biologically-Plausible-DetMaxNNs-for-Blind-Source-Separation-main/src/LDMIBSS.py]

import matplotlib as mpl
import matplotlib.pyplot as plt
import numpy as np
import pylab as pl
from IPython.display import Latex, Math, clear_output, display
from numba import njit
from tqdm import tqdm

from bss_utils import *
##### IMPORT MY UTILITY SCRIPTS #######
from BSSbase import *
from dsp_utils import *
# from general_utils import *
from numba_utils import *

# from visualization_utils import *

mpl.rcParams["xtick.labelsize"] = 15
mpl.rcParams["ytick.labelsize"] = 15


class LDMIBSS(BSSBaseClass):

    """
    Implementation of batch Log-Det Mutual Information Based Blind Source Separation Framework
    Parameters:
    =================================
    s_dim          -- Dimension of the sources
    x_dim          -- Dimension of the mixtures
    W              -- Feedforward Synapses

    Methods:
    ==================================


    """

    def __init__(self, s_dim, x_dim, W=None, set_ground_truth=False, S=None, A=None):
        if W is not None:
            assert W.shape == (
                s_dim,
                x_dim,
            ), "The shape of the initial guess W must be (s_dim, x_dim) = (%d,%d)" % (
                s_dim,
                x_dim,
            )
            W = W
        else:
            W = np.random.randn(s_dim, x_dim)

        self.s_dim = s_dim
        self.x_dim = x_dim
        self.W = W  # Trainable separator matrix, i.e., W@X \approx S
        ### Ground Truth Sources and Mixing Matrix For Debugging
        self.set_ground_truth = set_ground_truth
        self.S = S  # Sources
        self.A = A  # Mixing Matrix
        self.SIR_list = []
        self.SNR_list = []

    def evaluate_for_debug(self, W, Y, A, S, X):
        s_dim = self.s_dim
        # Y_ = W @ X
        Y_ = self.signed_and_permutation_corrected_sources(S, Y)
        coef_ = ((Y_ * S).sum(axis=1) / (Y_ * Y_).sum(axis=1)).reshape(-1, 1)
        Y_ = coef_ * Y_

        SINR = 10 * np.log10(self.CalculateSINRjit(Y_, S, False)[0])
        SNR = self.snr_jit(S, Y_)

        T = W @ A
        Tabs = np.abs(T)
        P = np.zeros((s_dim, s_dim))

        for SourceIndex in range(s_dim):
            Tmax = np.max(Tabs[SourceIndex, :])
            Tabs[SourceIndex, :] = Tabs[SourceIndex, :] / Tmax
            P[SourceIndex, :] = Tabs[SourceIndex, :] > 0.999

        GG = P.T @ T
        _, SGG, _ = np.linalg.svd(
            GG
        )  # SGG is the singular values of overall matrix Wf @ A

        return SINR, SNR, SGG, Y_, P

    def plot_for_debug(self, SIR_list, SNR_list, P, debug_iteration_point, YforPlot):
        pl.clf()
        pl.subplot(2, 2, 1)
        pl.plot(np.array(SIR_list), linewidth=5)
        pl.xlabel(f"Number of Iterations / {debug_iteration_point}", fontsize=45)
        pl.ylabel("SIR (dB)", fontsize=45)
        pl.title("SIR Behaviour", fontsize=45)
        pl.grid()
        pl.xticks(fontsize=45)
        pl.yticks(fontsize=45)

        pl.subplot(2, 2, 2)
        pl.plot(np.array(SNR_list), linewidth=5)
        pl.grid()
        pl.title("Component SNR Check", fontsize=45)
        pl.ylabel("SNR (dB)", fontsize=45)
        pl.xlabel(f"Number of Iterations / {debug_iteration_point}", fontsize=45)
        pl.xticks(fontsize=45)
        pl.yticks(fontsize=45)

        pl.subplot(2, 2, 3)
        pl.plot(np.array(self.SV_list), linewidth=5)
        pl.grid()
        pl.title(
            "Singular Value Check, Overall Matrix Rank: "
            + str(np.linalg.matrix_rank(P)),
            fontsize=45,
        )
        pl.xlabel(f"Number of Iterations / {debug_iteration_point}", fontsize=45)
        pl.xticks(fontsize=45)
        pl.yticks(fontsize=45)

        pl.subplot(2, 2, 4)
        pl.plot(YforPlot, linewidth=5)
        pl.title("Random 25 Output (from Y)", fontsize=45)
        pl.grid()
        pl.xticks(fontsize=45)
        pl.yticks(fontsize=45)

        clear_output(wait=True)
        display(pl.gcf())

    @staticmethod
    @njit
    def update_Y_corr_based(Y, X, W, epsilon, step_size):
        s_dim, samples = Y.shape[0], Y.shape[1]
        Identity_like_Y = np.eye(s_dim)
        RY = (1 / samples) * np.dot(Y, Y.T) + epsilon * Identity_like_Y
        E = Y - np.dot(W, X)
        RE = (1 / samples) * np.dot(E, E.T) + epsilon * Identity_like_Y
        gradY = (1 / samples) * (
            np.dot(np.linalg.pinv(RY), Y) - np.dot(np.linalg.pinv(RE), E)
        )
        Y = Y + (step_size) * gradY
        return Y

    @staticmethod
    @njit
    def update_Y_cov_based(Y, X, muX, W, epsilon, step_size):
        def mean_numba(a):

            res = []
            for i in range(a.shape[0]):
                res.append(a[i, :].mean())

            return np.array(res)

        s_dim, samples = Y.shape[0], Y.shape[1]
        muY = mean_numba(Y).reshape(-1, 1)
        Identity_like_Y = np.eye(s_dim)
        RY = (1 / samples) * (
            np.dot(Y, Y.T) - np.dot(muY, muY.T)
        ) + epsilon * Identity_like_Y
        E = (Y - muY) - np.dot(W, (X - muX.reshape(-1, 1)))
        muE = mean_numba(E).reshape(-1, 1)
        RE = (1 / samples) * (
            np.dot(E, E.T) - np.dot(muE, muE.T)
        ) + epsilon * Identity_like_Y
        gradY = (1 / samples) * (
            np.dot(np.linalg.pinv(RY), Y - muY) - np.dot(np.linalg.pinv(RE), E - muE)
        )
        Y = Y + (step_size) * gradY
        return Y

    def fit_batch_antisparse(
        self,
        X,
        n_iterations=1000,
        epsilon=1e-3,
        mu_start=100,
        method="correlation",
        debug_iteration_point=1,
        plot_in_jupyter=False,
    ):

        W = self.W
        U, singulars, V = np.linalg.svd(X, full_matrices=False)
        debugging = self.set_ground_truth

        assert X.shape[0] == self.x_dim, "You must input the transpose"

        samples = X.shape[1]

        if debugging:
            SIR_list = self.SIR_list
            SNR_list = self.SNR_list
            self.SV_list = []
            S = self.S
            A = self.A
            if plot_in_jupyter:
                plt.figure(figsize=(45, 30), dpi=80)

        if method == "correlation":
            RX = (1 / samples) * np.dot(X, X.T)
            RXinv = np.linalg.pinv(RX)
        elif method == "covariance":
            muX = np.mean(X, axis=1)
            RX = (1 / samples) * (np.dot(X, X.T) - np.outer(muX, muX))
            RXinv = np.linalg.pinv(RX)
        Y = np.zeros((self.s_dim, samples))
        # Y = (np.random.rand(self.s_dim, samples) - 0.5)/2
        # Y = (np.random.randn(self.s_dim, samples))
        # Y = V[0:self.s_dim,:]/100
        for k in tqdm(range(n_iterations)):
            if method == "correlation":
                Y = self.update_Y_corr_based(
                    Y, X, W, epsilon, (mu_start / np.sqrt(k + 1))
                )
                Y = self.ProjectOntoLInfty(Y)
                RYX = (1 / samples) * np.dot(Y, X.T)
            elif method == "covariance":
                Y = self.update_Y_cov_based(
                    Y, X, muX, W, epsilon, (mu_start / np.sqrt(k + 1))
                )
                Y = self.ProjectOntoLInfty(Y)
                muY = np.mean(Y, axis=1)
                RYX = (1 / samples) * (np.dot(Y, X.T) - np.outer(muY, muX))
            W = np.dot(RYX, RXinv)

            if debugging:
                if ((k % debug_iteration_point) == 0) | (k == n_iterations - 1):
                    try:
                        self.W = W
                        SINR, SNR, SGG, Y_, P = self.evaluate_for_debug(W, Y, A, S, X)
                        self.SV_list.append(abs(SGG))
                        SIR_list.append(SINR)
                        SNR_list.append(SNR)

                        self.SIR_list = SIR_list
                        self.SNR_list = SNR_list

                        if plot_in_jupyter:
                            random_idx = np.random.randint(Y.shape[1] - 25)
                            YforPlot = Y[:, random_idx - 25 : random_idx].T
                            self.plot_for_debug(
                                SIR_list, SNR_list, P, debug_iteration_point, YforPlot
                            )
                    except Exception as e:
                        print(str(e))
        self.W = W

    def fit_batch_nnantisparse(
        self,
        X,
        n_iterations=1000,
        epsilon=1e-3,
        mu_start=100,
        method="correlation",
        debug_iteration_point=1,
        plot_in_jupyter=False,
    ):

        W = self.W
        debugging = self.set_ground_truth

        assert X.shape[0] == self.x_dim, "You must input the transpose"

        samples = X.shape[1]

        if debugging:
            SIR_list = self.SIR_list
            SNR_list = self.SNR_list
            self.SV_list = []
            S = self.S
            A = self.A
            if plot_in_jupyter:
                plt.figure(figsize=(45, 30), dpi=80)

        if method == "correlation":
            RX = (1 / samples) * np.dot(X, X.T)
            RXinv = np.linalg.pinv(RX)
        elif method == "covariance":
            muX = np.mean(X, axis=1)
            RX = (1 / samples) * (np.dot(X, X.T) - np.outer(muX, muX))
            RXinv = np.linalg.pinv(RX)
        Y = np.zeros((self.s_dim, samples))
        Y = np.random.rand(self.s_dim, samples) / 2
        for k in tqdm(range(n_iterations)):
            if method == "correlation":
                Y = self.update_Y_corr_based(
                    Y, X, W, epsilon, (mu_start / np.sqrt(k + 1))
                )
                Y = self.ProjectOntoNNLInfty(Y)
                RYX = (1 / samples) * np.dot(Y, X.T)
            elif method == "covariance":
                Y = self.update_Y_cov_based(
                    Y, X, muX, W, epsilon, (mu_start / np.sqrt(k + 1))
                )
                Y = self.ProjectOntoNNLInfty(Y)
                muY = np.mean(Y, axis=1)
                RYX = (1 / samples) * (np.dot(Y, X.T) - np.outer(muY, muX))
            W = np.dot(RYX, RXinv)

            if debugging:
                if ((k % debug_iteration_point) == 0) | (k == n_iterations - 1):
                    try:
                        self.W = W
                        SINR, SNR, SGG, Y_, P = self.evaluate_for_debug(W, Y, A, S, X)
                        self.SV_list.append(abs(SGG))
                        SIR_list.append(SINR)
                        SNR_list.append(SNR)

                        self.SIR_list = SIR_list
                        self.SNR_list = SNR_list

                        if plot_in_jupyter:
                            random_idx = np.random.randint(Y.shape[1] - 25)
                            YforPlot = Y[:, random_idx - 25 : random_idx].T
                            self.plot_for_debug(
                                SIR_list, SNR_list, P, debug_iteration_point, YforPlot
                            )
                    except Exception as e:
                        print(str(e))

    def fit_batch_sparse(
        self,
        X,
        n_iterations=1000,
        epsilon=1e-3,
        mu_start=100,
        method="correlation",
        debug_iteration_point=1,
        plot_in_jupyter=False,
    ):

        W = self.W
        debugging = self.set_ground_truth

        assert X.shape[0] == self.x_dim, "You must input the transpose"

        samples = X.shape[1]

        if debugging:
            SIR_list = self.SIR_list
            SNR_list = self.SNR_list
            self.SV_list = []
            S = self.S
            A = self.A
            if plot_in_jupyter:
                plt.figure(figsize=(45, 30), dpi=80)

        if method == "correlation":
            RX = (1 / samples) * np.dot(X, X.T)
            RXinv = np.linalg.pinv(RX)
        elif method == "covariance":
            muX = np.mean(X, axis=1)
            RX = (1 / samples) * (np.dot(X, X.T) - np.outer(muX, muX))
            RXinv = np.linalg.pinv(RX)
        Y = np.zeros((self.s_dim, samples))
        # Y = np.random.rand(self.s_dim, samples)/2
        for k in tqdm(range(n_iterations)):
            if method == "correlation":
                Y = self.update_Y_corr_based(
                    Y, X, W, epsilon, (mu_start / np.sqrt(k + 1))
                )
                Y = self.ProjectRowstoL1NormBall(Y.T).T
                RYX = (1 / samples) * np.dot(Y, X.T)
            elif method == "covariance":
                Y = self.update_Y_cov_based(
                    Y, X, muX, W, epsilon, (mu_start / np.sqrt(k + 1))
                )
                Y = self.ProjectRowstoL1NormBall(Y.T).T
                muY = np.mean(Y, axis=1)
                RYX = (1 / samples) * (np.dot(Y, X.T) - np.outer(muY, muX))
            W = np.dot(RYX, RXinv)

            if debugging:
                if ((k % debug_iteration_point) == 0) | (k == n_iterations - 1):
                    try:
                        self.W = W
                        SINR, SNR, SGG, Y_, P = self.evaluate_for_debug(W, Y, A, S, X)
                        self.SV_list.append(abs(SGG))
                        SIR_list.append(SINR)
                        SNR_list.append(SNR)

                        self.SIR_list = SIR_list
                        self.SNR_list = SNR_list

                        if plot_in_jupyter:
                            random_idx = np.random.randint(Y.shape[1] - 25)
                            YforPlot = Y[:, random_idx - 25 : random_idx].T
                            self.plot_for_debug(
                                SIR_list, SNR_list, P, debug_iteration_point, YforPlot
                            )
                    except Exception as e:
                        print(str(e))
        self.W = W

    def fit_batch_nnsparse(
        self,
        X,
        n_iterations=1000,
        epsilon=1e-3,
        mu_start=100,
        method="correlation",
        debug_iteration_point=1,
        plot_in_jupyter=False,
    ):

        W = self.W
        debugging = self.set_ground_truth

        assert X.shape[0] == self.x_dim, "You must input the transpose"

        samples = X.shape[1]

        if debugging:
            SIR_list = self.SIR_list
            SNR_list = self.SNR_list
            self.SV_list = []
            S = self.S
            A = self.A
            if plot_in_jupyter:
                plt.figure(figsize=(45, 30), dpi=80)

        if method == "correlation":
            RX = (1 / samples) * np.dot(X, X.T)
            RXinv = np.linalg.pinv(RX)
        elif method == "covariance":
            muX = np.mean(X, axis=1)
            RX = (1 / samples) * (np.dot(X, X.T) - np.outer(muX, muX))
            RXinv = np.linalg.pinv(RX)
        Y = np.zeros((self.s_dim, samples))
        # Y = np.random.rand(self.s_dim, samples)/2
        for k in tqdm(range(n_iterations)):
            if method == "correlation":
                Y = self.update_Y_corr_based(
                    Y, X, W, epsilon, (mu_start / np.sqrt(k + 1))
                )
                Y = self.ProjectRowstoL1NormBall((Y * (Y >= 0)).T).T
                RYX = (1 / samples) * np.dot(Y, X.T)
            elif method == "covariance":
                Y = self.update_Y_cov_based(
                    Y, X, muX, W, epsilon, (mu_start / np.sqrt(k + 1))
                )
                Y = self.ProjectRowstoL1NormBall((Y * (Y >= 0)).T).T
                muY = np.mean(Y, axis=1)
                RYX = (1 / samples) * (np.dot(Y, X.T) - np.outer(muY, muX))
            W = np.dot(RYX, RXinv)

            if debugging:
                if ((k % debug_iteration_point) == 0) | (k == n_iterations - 1):
                    try:
                        self.W = W
                        SINR, SNR, SGG, Y_, P = self.evaluate_for_debug(W, Y, A, S, X)
                        self.SV_list.append(abs(SGG))
                        SIR_list.append(SINR)
                        SNR_list.append(SNR)

                        self.SIR_list = SIR_list
                        self.SNR_list = SNR_list

                        if plot_in_jupyter:
                            random_idx = np.random.randint(Y.shape[1] - 25)
                            YforPlot = Y[:, random_idx - 25 : random_idx].T
                            self.plot_for_debug(
                                SIR_list, SNR_list, P, debug_iteration_point, YforPlot
                            )
                    except Exception as e:
                        print(str(e))
        self.W = W

    def fit_batch_simplex(
        self,
        X,
        n_iterations=1000,
        epsilon=1e-3,
        mu_start=100,
        method="correlation",
        debug_iteration_point=1,
        plot_in_jupyter=False,
    ):

        W = self.W
        debugging = self.set_ground_truth

        assert X.shape[0] == self.x_dim, "You must input the transpose"

        samples = X.shape[1]

        if debugging:
            SIR_list = self.SIR_list
            SNR_list = self.SNR_list
            self.SV_list = []
            S = self.S
            A = self.A
            if plot_in_jupyter:
                plt.figure(figsize=(45, 30), dpi=80)

        if method == "correlation":
            RX = (1 / samples) * np.dot(X, X.T)
            RXinv = np.linalg.pinv(RX)
        elif method == "covariance":
            muX = np.mean(X, axis=1)
            RX = (1 / samples) * (np.dot(X, X.T) - np.outer(muX, muX))
            RXinv = np.linalg.pinv(RX)
        Y = np.zeros((self.s_dim, samples))
        # Y = np.random.rand(self.s_dim, samples)/2
        for k in tqdm(range(n_iterations)):
            if method == "correlation":
                Y = self.update_Y_corr_based(
                    Y, X, W, epsilon, (mu_start / np.sqrt(k + 1))
                )
                Y = self.ProjectColstoSimplex(Y)
                RYX = (1 / samples) * np.dot(Y, X.T)
            elif method == "covariance":
                Y = self.update_Y_cov_based(
                    Y, X, muX, W, epsilon, (mu_start / np.sqrt(k + 1))
                )
                Y = self.ProjectColstoSimplex(Y)
                muY = np.mean(Y, axis=1)
                RYX = (1 / samples) * (np.dot(Y, X.T) - np.outer(muY, muX))
            W = np.dot(RYX, RXinv)

            if debugging:
                if ((k % debug_iteration_point) == 0) | (k == n_iterations - 1):
                    try:
                        self.W = W
                        SINR, SNR, SGG, Y_, P = self.evaluate_for_debug(W, Y, A, S, X)
                        self.SV_list.append(abs(SGG))
                        SIR_list.append(SINR)
                        SNR_list.append(SNR)

                        self.SIR_list = SIR_list
                        self.SNR_list = SNR_list

                        if plot_in_jupyter:
                            random_idx = np.random.randint(Y.shape[1] - 25)
                            YforPlot = Y[:, random_idx - 25 : random_idx].T
                            self.plot_for_debug(
                                SIR_list, SNR_list, P, debug_iteration_point, YforPlot
                            )
                    except Exception as e:
                        print(str(e))
        self.W = W

    def fit_batch_general_polytope(
        self,
        X,
        signed_dims,
        nn_dims,
        sparse_dims_list,
        n_iterations=1000,
        epsilon=1e-3,
        mu_start=100,
        method="correlation",
        lr_rule="inv",
        debug_iteration_point=1,
        plot_in_jupyter=False,
    ):

        W = self.W
        debugging = self.set_ground_truth

        assert X.shape[0] == self.x_dim, "You must input the transpose"

        samples = X.shape[1]

        if debugging:
            SIR_list = self.SIR_list
            SNR_list = self.SNR_list
            self.SV_list = []
            S = self.S
            A = self.A
            if plot_in_jupyter:
                plt.figure(figsize=(45, 30), dpi=80)

        if method == "correlation":
            RX = (1 / samples) * np.dot(X, X.T)
            RXinv = np.linalg.pinv(RX)
        elif method == "covariance":
            muX = np.mean(X, axis=1)
            RX = (1 / samples) * (np.dot(X, X.T) - np.outer(muX, muX))
            RXinv = np.linalg.pinv(RX)
        Y = np.zeros((self.s_dim, samples))
        # Y = np.random.rand(self.s_dim, samples)/2
        for k in tqdm(range(n_iterations)):
            if lr_rule == "constant":
                update_mu = mu_start
            elif lr_rule == "inv_sqrt":
                update_mu = mu_start / np.sqrt(k + 1)
            elif lr_rule == "inv":
                update_mu = mu_start / (k + 1)
            if method == "correlation":
                # Y = self.update_Y_corr_based(Y, X, W, epsilon, (mu_start/np.sqrt(k+1)))
                Y = self.update_Y_corr_based(Y, X, W, epsilon, update_mu)
                Y = self.ProjectColumnsOntoPracticalPolytope(
                    Y, signed_dims, nn_dims, sparse_dims_list
                )
                RYX = (1 / samples) * np.dot(Y, X.T)
            elif method == "covariance":
                Y = self.update_Y_cov_based(Y, X, muX, W, epsilon, update_mu)
                Y = self.ProjectColumnsOntoPracticalPolytope(
                    Y, signed_dims, nn_dims, sparse_dims_list
                )
                muY = np.mean(Y, axis=1)
                RYX = (1 / samples) * (np.dot(Y, X.T) - np.outer(muY, muX))
            W = np.dot(RYX, RXinv)

            if debugging:
                if ((k % debug_iteration_point) == 0) | (k == n_iterations - 1):
                    try:
                        self.W = W
                        SINR, SNR, SGG, Y_, P = self.evaluate_for_debug(W, Y, A, S, X)
                        self.SV_list.append(abs(SGG))
                        SIR_list.append(SINR)
                        SNR_list.append(SNR)

                        self.SIR_list = SIR_list
                        self.SNR_list = SNR_list

                        if plot_in_jupyter:
                            random_idx = np.random.randint(Y.shape[1] - 25)
                            YforPlot = Y[:, random_idx - 25 : random_idx].T
                            self.plot_for_debug(
                                SIR_list, SNR_list, P, debug_iteration_point, YforPlot
                            )
                    except Exception as e:
                        print(str(e))
        self.W = W


class MinibatchLDMIBSS(LDMIBSS):

    """Implementation of batch Log-Det Mutual Information Based Blind Source Separation
    Framework.

    ALMOST THE SAME IMPLEMENTATION WITH THE ABOVE LDMIBSS CLASS. THE ONLY DIFFERENCE IS THAT
    THIS ALGORITHM UPDATES ARE PERFORMED BASED ON THE MINIBATCHES. THE ABOVE LDMIBSS CLASS IS
    WORKING SLOW WHEN THE NUMBER OF DATA IS BIG (FOR EXAMPLE THE MIXTURE SIZE IS (Nmixtures, Nsamples) = (10, 500000)).
    THEREFORE, IN EACH ITERATION, WE TAKE A MINIBATCH OF MIXTURES TO RUN THE ALGORITHM. IN THE DEBUGGING
    PART FOR SNR ANS SINR CALCULATION, THE WHOLE DATA IS USED (NOT THE MINIBATCHES).

    Parameters:
    =================================
    s_dim          -- Dimension of the sources
    x_dim          -- Dimension of the mixtures
    W              -- Feedforward Synapses
    By             -- Inverse Output Covariance
    Be             -- Inverse Error Covariance
    lambday        -- Ry forgetting factor
    lambdae        -- Re forgetting factor


    Methods:
    ==================================
    run_neural_dynamics_antisparse
    fit_batch_antisparse
    fit_batch_nnantisparse

    TODO : Generate a W_overall matrix and update it with affine combination based on minibatch operations !!!!
    """

    def __init__(self, s_dim, x_dim, W=None, set_ground_truth=False, S=None, A=None):
        if W is not None:
            assert W.shape == (
                s_dim,
                x_dim,
            ), "The shape of the initial guess W must be (s_dim, x_dim) = (%d,%d)" % (
                s_dim,
                x_dim,
            )
            W = W
        else:
            W = np.random.randn(s_dim, x_dim)

        self.s_dim = s_dim
        self.x_dim = x_dim
        self.W = W  # Trainable separator matrix, i.e., W@X \approx S
        ### Ground Truth Sources and Mixing Matrix For Debugging
        self.set_ground_truth = set_ground_truth
        self.S = S  # Sources
        self.A = A  # Mixing Matrix
        self.SIR_list = []
        self.SNR_list = []

    def fit_batch_antisparse(
        self,
        X,
        batch_size=10000,
        n_epochs=1,
        n_iterations_per_batch=500,
        epsilon=1e-3,
        mu_start=100,
        method="correlation",
        debug_iteration_point=1,
        drop_last_batch=True,
        plot_in_jupyter=False,
    ):

        W = self.W
        debugging = self.set_ground_truth

        assert X.shape[0] == self.x_dim, "You must input the transpose"

        samples = X.shape[1]

        if debugging:
            SIR_list = self.SIR_list
            SNR_list = self.SNR_list
            self.SV_list = []
            S = self.S
            A = self.A
            if plot_in_jupyter:
                plt.figure(figsize=(45, 30), dpi=80)

        total_iteration = 1
        if drop_last_batch:
            m = (X.shape[1]) // batch_size
        else:
            m = int(np.ceil((X.shape[1]) / batch_size))
        for epoch_ in range(n_epochs):
            for kk in range(m):
                Xbatch = X[:, kk * batch_size : (kk + 1) * batch_size]
                sample_batch_size = Xbatch.shape[1]
                if kk == 0:
                    Ybatch = np.random.randn(self.s_dim, Xbatch.shape[1]) / 5
                    Ybatch = np.zeros((self.s_dim, Xbatch.shape[1]))
                else:
                    Ybatch = self.W @ Xbatch
                if method == "correlation":
                    RX = (1 / sample_batch_size) * np.dot(Xbatch, Xbatch.T)
                    RXinv = np.linalg.pinv(RX)
                elif method == "covariance":
                    muX = np.mean(Xbatch, axis=1)
                    RX = (1 / sample_batch_size) * (
                        np.dot(Xbatch, Xbatch.T) - np.outer(muX, muX)
                    )
                    RXinv = np.linalg.pinv(RX)

                for k in tqdm(range(n_iterations_per_batch)):
                    if method == "correlation":
                        Ybatch = self.update_Y_corr_based(
                            Ybatch,
                            Xbatch,
                            W,
                            epsilon,
                            (mu_start / np.sqrt((k + 1) * kk + 1)),
                        )
                        Ybatch = self.ProjectOntoLInfty(Ybatch)
                        RYX = (1 / sample_batch_size) * np.dot(Ybatch, Xbatch.T)
                    elif method == "covariance":
                        Ybatch = self.update_Y_cov_based(
                            Ybatch,
                            Xbatch,
                            muX,
                            W,
                            epsilon,
                            (mu_start / np.sqrt(total_iteration + 1)),
                        )
                        Ybatch = self.ProjectOntoLInfty(Ybatch)
                        muY = np.mean(Ybatch, axis=1)
                        RYX = (1 / sample_batch_size) * (
                            np.dot(Ybatch, Xbatch.T) - np.outer(muY, muX)
                        )
                    W = np.dot(RYX, RXinv)
                    self.W = W
                    total_iteration += 1
                    if debugging:
                        if ((k % debug_iteration_point) == 0) | (
                            k == n_iterations_per_batch - 1
                        ):
                            try:
                                self.W = W
                                Y = W @ X
                                SINR, SNR, SGG, Y_, P = self.evaluate_for_debug(
                                    W, Y, A, S, X
                                )
                                self.SV_list.append(abs(SGG))
                                SIR_list.append(SINR)
                                SNR_list.append(SNR)

                                self.SIR_list = SIR_list
                                self.SNR_list = SNR_list

                                if plot_in_jupyter:
                                    random_idx = np.random.randint(Y.shape[1] - 25)
                                    YforPlot = Y[:, random_idx - 25 : random_idx].T
                                    self.plot_for_debug(
                                        SIR_list,
                                        SNR_list,
                                        P,
                                        debug_iteration_point,
                                        YforPlot,
                                    )
                            except Exception as e:
                                print(str(e))

    def fit_batch_nnantisparse(
        self,
        X,
        batch_size=10000,
        n_epochs=1,
        n_iterations_per_batch=500,
        epsilon=1e-3,
        mu_start=100,
        method="correlation",
        debug_iteration_point=1,
        drop_last_batch=True,
        plot_in_jupyter=False,
    ):

        W = self.W
        debugging = self.set_ground_truth

        assert X.shape[0] == self.x_dim, "You must input the transpose"

        samples = X.shape[1]

        if debugging:
            SIR_list = self.SIR_list
            SNR_list = self.SNR_list
            self.SV_list = []
            S = self.S
            A = self.A
            if plot_in_jupyter:
                plt.figure(figsize=(45, 30), dpi=80)

        total_iteration = 1
        if drop_last_batch:
            m = (X.shape[1]) // batch_size
        else:
            m = int(np.ceil((X.shape[1]) / batch_size))
        for epoch_ in range(n_epochs):
            for kk in range(m):
                Xbatch = X[:, kk * batch_size : (kk + 1) * batch_size]
                sample_batch_size = Xbatch.shape[1]
                if kk == 0:
                    Ybatch = np.random.rand(self.s_dim, Xbatch.shape[1]) / 2
                else:
                    Ybatch = self.W @ Xbatch
                if method == "correlation":
                    RX = (1 / sample_batch_size) * np.dot(Xbatch, Xbatch.T)
                    RXinv = np.linalg.pinv(RX)
                elif method == "covariance":
                    muX = np.mean(Xbatch, axis=1)
                    RX = (1 / sample_batch_size) * (
                        np.dot(Xbatch, Xbatch.T) - np.outer(muX, muX)
                    )
                    RXinv = np.linalg.pinv(RX)

                for k in tqdm(range(n_iterations_per_batch)):
                    if method == "correlation":
                        Ybatch = self.update_Y_corr_based(
                            Ybatch,
                            Xbatch,
                            W,
                            epsilon,
                            (mu_start / np.sqrt((k + 1) * kk + 1)),
                        )
                        Ybatch = self.ProjectOntoNNLInfty(Ybatch)
                        RYX = (1 / sample_batch_size) * np.dot(Ybatch, Xbatch.T)
                    elif method == "covariance":
                        Ybatch = self.update_Y_cov_based(
                            Ybatch,
                            Xbatch,
                            muX,
                            W,
                            epsilon,
                            (mu_start / np.sqrt(total_iteration + 1)),
                        )
                        Ybatch = self.ProjectOntoNNLInfty(Ybatch)
                        muY = np.mean(Ybatch, axis=1)
                        RYX = (1 / sample_batch_size) * (
                            np.dot(Ybatch, Xbatch.T) - np.outer(muY, muX)
                        )
                    W = np.dot(RYX, RXinv)
                    self.W = W
                    total_iteration += 1
                    if debugging:
                        if ((k % debug_iteration_point) == 0) | (
                            k == n_iterations_per_batch - 1
                        ):
                            try:
                                self.W = W
                                Y = W @ X
                                SINR, SNR, SGG, Y_, P = self.evaluate_for_debug(
                                    W, Y, A, S, X
                                )
                                self.SV_list.append(abs(SGG))
                                SIR_list.append(SINR)
                                SNR_list.append(SNR)

                                self.SIR_list = SIR_list
                                self.SNR_list = SNR_list

                                if plot_in_jupyter:
                                    random_idx = np.random.randint(Y.shape[1] - 25)
                                    YforPlot = Y[:, random_idx - 25 : random_idx].T
                                    self.plot_for_debug(
                                        SIR_list,
                                        SNR_list,
                                        P,
                                        debug_iteration_point,
                                        YforPlot,
                                    )
                            except Exception as e:
                                print(str(e))

    def fit_batch_sparse(
        self,
        X,
        batch_size=10000,
        n_epochs=1,
        n_iterations_per_batch=500,
        epsilon=1e-3,
        mu_start=100,
        method="correlation",
        debug_iteration_point=1,
        drop_last_batch=True,
        plot_in_jupyter=False,
    ):

        W = self.W
        debugging = self.set_ground_truth

        assert X.shape[0] == self.x_dim, "You must input the transpose"

        samples = X.shape[1]

        if debugging:
            SIR_list = self.SIR_list
            SNR_list = self.SNR_list
            self.SV_list = []
            S = self.S
            A = self.A
            if plot_in_jupyter:
                plt.figure(figsize=(45, 30), dpi=80)

        total_iteration = 1
        if drop_last_batch:
            m = (X.shape[1]) // batch_size
        else:
            m = int(np.ceil((X.shape[1]) / batch_size))
        for epoch_ in range(n_epochs):
            for kk in range(m):
                Xbatch = X[:, kk * batch_size : (kk + 1) * batch_size]
                sample_batch_size = Xbatch.shape[1]
                if kk == 0:
                    Ybatch = np.zeros((self.s_dim, Xbatch.shape[1]))
                else:
                    Ybatch = self.W @ Xbatch
                if method == "correlation":
                    RX = (1 / sample_batch_size) * np.dot(Xbatch, Xbatch.T)
                    RXinv = np.linalg.pinv(RX)
                elif method == "covariance":
                    muX = np.mean(Xbatch, axis=1)
                    RX = (1 / sample_batch_size) * (
                        np.dot(Xbatch, Xbatch.T) - np.outer(muX, muX)
                    )
                    RXinv = np.linalg.pinv(RX)

                for k in tqdm(range(n_iterations_per_batch)):
                    if method == "correlation":
                        Ybatch = self.update_Y_corr_based(
                            Ybatch,
                            Xbatch,
                            W,
                            epsilon,
                            (mu_start / np.sqrt((k + 1) * kk + 1)),
                        )
                        Ybatch = self.ProjectRowstoL1NormBall(Ybatch.T).T
                        RYX = (1 / sample_batch_size) * np.dot(Ybatch, Xbatch.T)
                    elif method == "covariance":
                        Ybatch = self.update_Y_cov_based(
                            Ybatch,
                            Xbatch,
                            muX,
                            W,
                            epsilon,
                            (mu_start / np.sqrt(total_iteration + 1)),
                        )
                        Ybatch = self.ProjectRowstoL1NormBall(Ybatch.T).T
                        muY = np.mean(Ybatch, axis=1)
                        RYX = (1 / sample_batch_size) * (
                            np.dot(Ybatch, Xbatch.T) - np.outer(muY, muX)
                        )
                    W = np.dot(RYX, RXinv)
                    self.W = W
                    total_iteration += 1
                    if debugging:
                        if ((k % debug_iteration_point) == 0) | (
                            k == n_iterations_per_batch - 1
                        ):
                            try:
                                self.W = W
                                Y = W @ X
                                SINR, SNR, SGG, Y_, P = self.evaluate_for_debug(
                                    W, Y, A, S, X
                                )
                                self.SV_list.append(abs(SGG))
                                SIR_list.append(SINR)
                                SNR_list.append(SNR)

                                self.SIR_list = SIR_list
                                self.SNR_list = SNR_list

                                if plot_in_jupyter:
                                    random_idx = np.random.randint(Y.shape[1] - 25)
                                    YforPlot = Y[:, random_idx - 25 : random_idx].T
                                    self.plot_for_debug(
                                        SIR_list,
                                        SNR_list,
                                        P,
                                        debug_iteration_point,
                                        YforPlot,
                                    )
                            except Exception as e:
                                print(str(e))

    def fit_batch_nnsparse(
        self,
        X,
        batch_size=10000,
        n_epochs=1,
        n_iterations_per_batch=500,
        epsilon=1e-3,
        mu_start=100,
        method="correlation",
        debug_iteration_point=1,
        drop_last_batch=True,
        plot_in_jupyter=False,
    ):

        W = self.W
        debugging = self.set_ground_truth

        assert X.shape[0] == self.x_dim, "You must input the transpose"

        samples = X.shape[1]

        if debugging:
            SIR_list = self.SIR_list
            SNR_list = self.SNR_list
            self.SV_list = []
            S = self.S
            A = self.A
            if plot_in_jupyter:
                plt.figure(figsize=(45, 30), dpi=80)

        total_iteration = 1
        if drop_last_batch:
            m = (X.shape[1]) // batch_size
        else:
            m = int(np.ceil((X.shape[1]) / batch_size))
        for epoch_ in range(n_epochs):
            for kk in range(m):
                Xbatch = X[:, kk * batch_size : (kk + 1) * batch_size]
                sample_batch_size = Xbatch.shape[1]
                if kk == 0:
                    Ybatch = np.zeros((self.s_dim, Xbatch.shape[1]))
                else:
                    Ybatch = self.W @ Xbatch
                if method == "correlation":
                    RX = (1 / sample_batch_size) * np.dot(Xbatch, Xbatch.T)
                    RXinv = np.linalg.pinv(RX)
                elif method == "covariance":
                    muX = np.mean(Xbatch, axis=1)
                    RX = (1 / sample_batch_size) * (
                        np.dot(Xbatch, Xbatch.T) - np.outer(muX, muX)
                    )
                    RXinv = np.linalg.pinv(RX)

                for k in tqdm(range(n_iterations_per_batch)):
                    if method == "correlation":
                        Ybatch = self.update_Y_corr_based(
                            Ybatch,
                            Xbatch,
                            W,
                            epsilon,
                            (mu_start / np.sqrt((k + 1) * kk + 1)),
                        )
                        Ybatch = self.ProjectRowstoL1NormBall(
                            (Ybatch * (Ybatch >= 0)).T
                        ).T
                        RYX = (1 / sample_batch_size) * np.dot(Ybatch, Xbatch.T)
                    elif method == "covariance":
                        Ybatch = self.update_Y_cov_based(
                            Ybatch,
                            Xbatch,
                            muX,
                            W,
                            epsilon,
                            (mu_start / np.sqrt(total_iteration + 1)),
                        )
                        Ybatch = self.ProjectRowstoL1NormBall(
                            (Ybatch * (Ybatch >= 0)).T
                        ).T
                        muY = np.mean(Ybatch, axis=1)
                        RYX = (1 / sample_batch_size) * (
                            np.dot(Ybatch, Xbatch.T) - np.outer(muY, muX)
                        )
                    W = np.dot(RYX, RXinv)
                    self.W = W
                    total_iteration += 1
                    if debugging:
                        if ((k % debug_iteration_point) == 0) | (
                            k == n_iterations_per_batch - 1
                        ):
                            try:
                                self.W = W
                                Y = W @ X
                                SINR, SNR, SGG, Y_, P = self.evaluate_for_debug(
                                    W, Y, A, S, X
                                )
                                self.SV_list.append(abs(SGG))
                                SIR_list.append(SINR)
                                SNR_list.append(SNR)

                                self.SIR_list = SIR_list
                                self.SNR_list = SNR_list

                                if plot_in_jupyter:
                                    random_idx = np.random.randint(Y.shape[1] - 25)
                                    YforPlot = Y[:, random_idx - 25 : random_idx].T
                                    self.plot_for_debug(
                                        SIR_list,
                                        SNR_list,
                                        P,
                                        debug_iteration_point,
                                        YforPlot,
                                    )
                            except Exception as e:
                                print(str(e))

    def fit_batch_simplex(
        self,
        X,
        batch_size=10000,
        n_epochs=1,
        n_iterations_per_batch=500,
        epsilon=1e-3,
        mu_start=100,
        method="correlation",
        debug_iteration_point=1,
        drop_last_batch=True,
        plot_in_jupyter=False,
    ):

        W = self.W
        debugging = self.set_ground_truth

        assert X.shape[0] == self.x_dim, "You must input the transpose"

        samples = X.shape[1]

        if debugging:
            SIR_list = self.SIR_list
            SNR_list = self.SNR_list
            self.SV_list = []
            S = self.S
            A = self.A
            if plot_in_jupyter:
                plt.figure(figsize=(45, 30), dpi=80)

        total_iteration = 1
        if drop_last_batch:
            m = (X.shape[1]) // batch_size
        else:
            m = int(np.ceil((X.shape[1]) / batch_size))
        for epoch_ in range(n_epochs):
            for kk in range(m):
                Xbatch = X[:, kk * batch_size : (kk + 1) * batch_size]
                sample_batch_size = Xbatch.shape[1]
                if kk == 0:
                    Ybatch = np.zeros((self.s_dim, Xbatch.shape[1]))
                else:
                    Ybatch = self.W @ Xbatch
                if method == "correlation":
                    RX = (1 / sample_batch_size) * np.dot(Xbatch, Xbatch.T)
                    RXinv = np.linalg.pinv(RX)
                elif method == "covariance":
                    muX = np.mean(Xbatch, axis=1)
                    RX = (1 / sample_batch_size) * (
                        np.dot(Xbatch, Xbatch.T) - np.outer(muX, muX)
                    )
                    RXinv = np.linalg.pinv(RX)

                for k in tqdm(range(n_iterations_per_batch)):
                    if method == "correlation":
                        Ybatch = self.update_Y_corr_based(
                            Ybatch,
                            Xbatch,
                            W,
                            epsilon,
                            (mu_start / np.sqrt((k + 1) * kk + 1)),
                        )
                        Ybatch = self.ProjectColstoSimplex(Ybatch)
                        RYX = (1 / sample_batch_size) * np.dot(Ybatch, Xbatch.T)
                    elif method == "covariance":
                        Ybatch = self.update_Y_cov_based(
                            Ybatch,
                            Xbatch,
                            muX,
                            W,
                            epsilon,
                            (mu_start / np.sqrt(total_iteration + 1)),
                        )
                        Ybatch = self.ProjectColstoSimplex(Ybatch)
                        muY = np.mean(Ybatch, axis=1)
                        RYX = (1 / sample_batch_size) * (
                            np.dot(Ybatch, Xbatch.T) - np.outer(muY, muX)
                        )
                    W = np.dot(RYX, RXinv)
                    self.W = W
                    total_iteration += 1
                    if debugging:
                        if ((k % debug_iteration_point) == 0) | (
                            k == n_iterations_per_batch - 1
                        ):
                            try:
                                self.W = W
                                Y = W @ X
                                SINR, SNR, SGG, Y_, P = self.evaluate_for_debug(
                                    W, Y, A, S, X
                                )
                                self.SV_list.append(abs(SGG))
                                SIR_list.append(SINR)
                                SNR_list.append(SNR)

                                self.SIR_list = SIR_list
                                self.SNR_list = SNR_list

                                if plot_in_jupyter:
                                    random_idx = np.random.randint(Y.shape[1] - 25)
                                    YforPlot = Y[:, random_idx - 25 : random_idx].T
                                    self.plot_for_debug(
                                        SIR_list,
                                        SNR_list,
                                        P,
                                        debug_iteration_point,
                                        YforPlot,
                                    )
                            except Exception as e:
                                print(str(e))
