# Supplementary material
Source: ML conference proceedings conference paper supplement (https://proceedings.neurips.cc/paper_files/paper/2022/hash/58cb483be90d31f9afea3a9e992a2abe-Abstract.html)
Supplement: Supplementary file 1 [file 58cb483be90d31f9afea3a9e992a2abe-Supplemental-Conference.zip › biologically_plausible_determi-Supplementary Material/Codes/Biologically-Plausible-DetMaxNNs-for-Blind-Source-Separation-main/src/WSMBSS.py]

import matplotlib as mpl
import matplotlib.pyplot as plt
import numpy as np
import pylab as pl
from IPython.display import Latex, Math, clear_output, display
from numba import njit
from tqdm import tqdm

from bss_utils import *
##### IMPORT MY UTILITY SCRIPTS #######
from BSSbase import *
from dsp_utils import *
# from general_utils import *
from numba_utils import *

# from visualization_utils import *

mpl.rcParams["xtick.labelsize"] = 15
mpl.rcParams["ytick.labelsize"] = 15

@njit
def clipping(inp, lev):
    out = inp * (np.abs(inp) <= lev) + lev * (inp > lev) - lev * (inp < -lev)
    return out

################ WEIGHTED SIMILARITY MATCHING BLIND SOURCE SEPARATION #######################
class OnlineWSMBSS(BSSBaseClass):
    """_summary_"""

    def __init__(
        self,
        s_dim,
        x_dim,
        h_dim=None,
        gammaW_start=[0.2, 0.2],
        gammaW_stop=[0.001, 0.001],
        gammaM_start=[0.2, 0.2],
        gammaM_stop=[0.001, 0.001],
        beta=0.5,
        zeta=1e-4,
        muD=[25, 25],
        W_HX=None,
        W_YH=None,
        M_H=None,
        M_Y=None,
        D1=None,
        D2=None,
        WScalings=[0.0033, 0.0033],
        GamScalings=[0.02, 0.02],
        DScalings=[25, 1],
        LayerMinimumGains=[1e-6, 1],
        LayerMaximumGains=[1e6, 1],
        neural_OUTPUT_COMP_TOL=1e-5,
        set_ground_truth=False,
        S=None,
        A=None,
    ):
        """_summary_

        Args:
            s_dim (_type_): _description_
            x_dim (_type_): _description_
            h_dim (_type_, optional): _description_. Defaults to None.
            gamma_start (float, optional): _description_. Defaults to 0.2.
            gamma_stop (float, optional): _description_. Defaults to 0.001.
            beta (float, optional): _description_. Defaults to 0.5.
            zeta (_type_, optional): _description_. Defaults to 1e-4.
            muD (list, optional): _description_. Defaults to [25,25].
            W_HX (_type_, optional): _description_. Defaults to None.
            W_YH (_type_, optional): _description_. Defaults to None.
            M_H (_type_, optional): _description_. Defaults to None.
            M_Y (_type_, optional): _description_. Defaults to None.
            D1 (_type_, optional): _description_. Defaults to None.
            D2 (_type_, optional): _description_. Defaults to None.
            WScalings (list, optional): _description_. Defaults to [0.0033,0.0033].
            GamScalings (list, optional): _description_. Defaults to [0.02, 0.02].
            DScalings (list, optional): _description_. Defaults to [25,1].
            LayerMinimumGains (list, optional): _description_. Defaults to [1e-6,1].
            LayerMaximumGains (list, optional): _description_. Defaults to [1e6,1].
            neural_OUTPUT_COMP_TOL (_type_, optional): _description_. Defaults to 1e-5.
            set_ground_truth (bool, optional): _description_. Defaults to False.
            S (_type_, optional): _description_. Defaults to None.
            A (_type_, optional): _description_. Defaults to None.
        """
        if h_dim is None:
            h_dim = s_dim
        else:
            h_dim = h_dim

        if W_HX is not None:
            assert W_HX.shape == (
                h_dim,
                x_dim,
            ), "The shape of the initial guess W must be (h_dim,x_dim)=(%d,%d)" % (
                h_dim,
                x_dim,
            )
            W_HX = W_HX
        else:
            W_HX = np.random.standard_normal(size=(h_dim, x_dim))
            for k in range(W_HX.shape[0]):
                W_HX[k, :] = WScalings[0] * W_HX[k, :] / np.linalg.norm(W_HX[k, :])

        if W_YH is not None:
            assert W_YH.shape == (
                s_dim,
                h_dim,
            ), "The shape of the initial guess W must be (s_dim,h_dim)=(%d,%d)" % (
                s_dim,
                h_dim,
            )
            W_YH = W_YH
        else:
            W_YH = np.random.standard_normal(size=(s_dim, h_dim))
            for k in range(W_YH.shape[0]):
                W_YH[k, :] = WScalings[1] * W_YH[k, :] / np.linalg.norm(W_YH[k, :])

        if M_H is not None:
            assert M_H.shape == (
                h_dim,
                h_dim,
            ), "The shape of the initial guess M must be (h_dim,h_dim)=(%d,%d)" % (
                h_dim,
                h_dim,
            )
            M_H = M_H
        else:
            M_H = GamScalings[0] * np.eye(h_dim)

        if M_Y is not None:
            assert M_Y.shape == (
                s_dim,
                s_dim,
            ), "The shape of the initial guess M must be (s_dim,s_dim)=(%d,%d)" % (
                s_dim,
                s_dim,
            )
            M_Y = M_Y
        else:
            M_Y = GamScalings[1] * np.eye(s_dim)

        if D1 is not None:
            assert D1.shape == (
                h_dim,
                1,
            ), "The shape of the initial guess D must be (h_dim,h_dim)=(%d,%d)" % (
                h_dim,
                h_dim,
            )
            D1 = D1
        else:
            D1 = DScalings[0] * np.ones((h_dim, 1))

        if D2 is not None:
            assert D2.shape == (
                s_dim,
                1,
            ), "The shape of the initial guess D must be (s_dim,s_dim)=(%d,%d)" % (
                s_dim,
                s_dim,
            )
            D2 = D2
        else:
            D2 = DScalings[1] * np.ones((s_dim, 1))

        self.s_dim = s_dim
        self.h_dim = h_dim
        self.x_dim = x_dim
        if isinstance(gammaM_start, list):
            gammaM_start = np.array(gammaM_start)
        if isinstance(gammaM_stop, list):
            gammaM_stop = np.array(gammaM_stop)
        if isinstance(gammaW_start, list):
            gammaW_start = np.array(gammaW_start)
        if isinstance(gammaW_stop, list):
            gammaW_stop = np.array(gammaW_stop)
        self.gammaM_start = gammaM_start
        self.gammaM_stop = gammaM_stop
        self.gammaW_start = gammaW_start
        self.gammaW_stop = gammaW_stop
        self.beta = beta
        self.zeta = zeta
        self.muD = muD
        self.W_HX = W_HX
        self.W_YH = W_YH
        self.M_H = M_H
        self.M_Y = M_Y
        self.D1 = D1
        self.D2 = D2
        self.neural_OUTPUT_COMP_TOL = neural_OUTPUT_COMP_TOL
        if isinstance(LayerMinimumGains, list):
            LayerMinimumGains = np.array(LayerMinimumGains)
        if isinstance(LayerMaximumGains, list):
            LayerMaximumGains = np.array(LayerMaximumGains)
        self.LayerMinimumGains = LayerMinimumGains
        self.LayerMaximumGains = LayerMaximumGains
        self.Y = None
        self.H = None
        self.WScalings = WScalings
        self.sample_index = 0
        ### Ground Truth Sources and Mixing Matrix For Debugging
        self.set_ground_truth = set_ground_truth
        self.S = S  # Sources
        self.A = A  # Mixing Matrix
        self.SIR_list = []
        self.SNR_list = []

    ############################################################################################
    ############### REQUIRED FUNCTIONS FOR DEBUGGING ###########################################
    ############################################################################################
    def evaluate_for_debug(self, W, A, S, X, mean_normalize_estimation=False):

        s_dim = self.s_dim
        Y_ = W @ X
        if mean_normalize_estimation:
            Y_ = Y_ - Y_.mean(axis=1).reshape(-1, 1)
        Y_ = self.signed_and_permutation_corrected_sources(S, Y_)
        coef_ = ((Y_ * S).sum(axis=1) / (Y_ * Y_).sum(axis=1)).reshape(-1, 1)
        Y_ = coef_ * Y_

        SINR = 10 * np.log10(self.CalculateSINRjit(Y_, S, False)[0])
        SNR = self.snr_jit(S, Y_)

        T = W @ A
        Tabs = np.abs(T)
        P = np.zeros((s_dim, s_dim))

        for SourceIndex in range(s_dim):
            Tmax = np.max(Tabs[SourceIndex, :])
            Tabs[SourceIndex, :] = Tabs[SourceIndex, :] / Tmax
            P[SourceIndex, :] = Tabs[SourceIndex, :] > 0.999

        GG = P.T @ T
        _, SGG, _ = np.linalg.svd(
            GG
        )  # SGG is the singular values of overall matrix Wf @ A

        return SINR, SNR, SGG, Y_, P

    def evaluate_for_debugV2(self, W, A, S, X, mean_normalize_estimation=False):

        s_dim = self.s_dim
        Y_ = W @ X
        if mean_normalize_estimation:
            Y_ = Y_ - Y_.mean(axis=1).reshape(-1, 1)
        # Y_ = self.signed_and_permutation_corrected_sources(S, Y_)
        Y_ = self.signed_and_permutation_corrected_sourcesV2(S, Y_)
        coef_ = ((Y_ * S).sum(axis=1) / (Y_ * Y_).sum(axis=1)).reshape(-1, 1)
        Y_ = coef_ * Y_

        SINR = 10 * np.log10(self.CalculateSINRjit(Y_, S, False)[0])
        SNR = self.snr_jit(S, Y_)

        T = W @ A
        Tabs = np.abs(T)
        P = np.zeros((s_dim, s_dim))

        for SourceIndex in range(s_dim):
            Tmax = np.max(Tabs[SourceIndex, :])
            Tabs[SourceIndex, :] = Tabs[SourceIndex, :] / Tmax
            P[SourceIndex, :] = Tabs[SourceIndex, :] > 0.999

        GG = P.T @ T
        _, SGG, _ = np.linalg.svd(
            GG
        )  # SGG is the singular values of overall matrix Wf @ A

        return SINR, SNR, SGG, Y_, P

    def plot_for_debug(
        self, SIR_list, SNR_list, D1list, D2list, P, debug_iteration_point, YforPlot
    ):
        pl.clf()
        pl.subplot(3, 2, 1)
        pl.plot(np.array(SIR_list), linewidth=5)
        pl.xlabel("Number of Iterations / {}".format(debug_iteration_point), fontsize=45)
        pl.ylabel("SIR (dB)", fontsize=45)
        pl.title("SIR Behaviour", fontsize=45)
        pl.grid()
        pl.xticks(fontsize=45)
        pl.yticks(fontsize=45)

        pl.subplot(3, 2, 2)
        pl.plot(np.array(SNR_list), linewidth=5)
        pl.grid()
        pl.title("Component SNR Check", fontsize=45)
        pl.ylabel("SNR (dB)", fontsize=45)
        pl.xlabel("Number of Iterations / {}".format(debug_iteration_point), fontsize=45)
        pl.xticks(fontsize=45)
        pl.yticks(fontsize=45)

        pl.subplot(3, 2, 3)
        pl.plot(np.array(D1list), linewidth=5)
        pl.grid()
        pl.title("Diagonal Values of D1", fontsize=45)
        pl.xlabel("Number of Iterations / {}".format(debug_iteration_point), fontsize=45)
        pl.xticks(fontsize=45)
        pl.yticks(fontsize=45)

        pl.subplot(3, 2, 4)
        pl.plot(np.array(D2list), linewidth=5)
        pl.grid()
        pl.title("Diagonal Values of D2", fontsize=45)
        pl.xlabel("Number of Iterations / {}".format(debug_iteration_point), fontsize=45)
        pl.xticks(fontsize=45)
        pl.yticks(fontsize=45)

        pl.subplot(3, 2, 5)
        pl.plot(np.array(self.SV_list), linewidth=5)
        pl.grid()
        pl.title(
            "Singular Value Check, Overall Matrix Rank: "
            + str(np.linalg.matrix_rank(P)),
            fontsize=45,
        )
        pl.xlabel("Number of Iterations / {}".format(debug_iteration_point), fontsize=45)
        pl.xticks(fontsize=45)
        pl.yticks(fontsize=45)

        pl.subplot(3, 2, 6)
        pl.plot(YforPlot, linewidth=5)
        pl.title("Y last 25", fontsize=45)
        pl.grid()
        pl.xticks(fontsize=45)
        pl.yticks(fontsize=45)

        clear_output(wait=True)
        display(pl.gcf())

    @staticmethod
    @njit
    def compute_overall_mapping_jit(beta, zeta, D1, D2, M_H, M_Y, W_HX, W_YH):
        """_summary_

        Args:
            beta (_type_): _description_
            zeta (_type_): _description_
            D1 (_type_): _description_
            D2 (_type_): _description_
            M_H (_type_): _description_
            M_Y (_type_): _description_
            W_HX (_type_): _description_
            W_YH (_type_): _description_

        Returns:
            _type_: _description_
        """
        # Mapping from xt -> ht
        A = (1 - zeta) * (
            beta * ((D1 * M_H) * D1.T)
            + (1 - beta) * (M_H - W_YH.T @ np.linalg.solve(M_Y, W_YH))
        )
        b = (1 - zeta) * beta * (D1 * W_HX)
        WL1 = np.linalg.solve(A, b)
        # Mapping from ht -> yt
        WL2 = np.linalg.solve(M_Y * D2.T, W_YH)
        W = WL2 @ WL1
        return W

    def compute_overall_mapping(self, return_mapping=False):
        """_summary_

        Args:
            return_mapping (bool, optional): _description_. Defaults to False.

        Returns:
            _type_: _description_
        """
        beta, zeta, D1, D2, M_H, M_Y, W_HX, W_YH = (
            self.beta,
            self.zeta,
            self.D1,
            self.D2,
            self.M_H,
            self.M_Y,
            self.W_HX,
            self.W_YH,
        )
        W = self.compute_overall_mapping_jit(beta, zeta, D1, D2, M_H, M_Y, W_HX, W_YH)
        self.W = W

        if return_mapping:
            return W

    def predict(self, X):
        """_summary_

        Args:
            X (_type_): _description_

        Returns:
            _type_: _description_
        """
        beta, zeta, W_HX, W_YH, M_H, M_Y, D1, D2 = (
            self.beta,
            self.zeta,
            self.W_HX,
            self.W_YH,
            self.M_H,
            self.M_Y,
            self.D1,
            self.D2,
        )
        W = self.compute_overall_mapping_jit(beta, zeta, D1, D2, M_H, M_Y, W_HX, W_YH)
        return W @ X

    @staticmethod
    @njit
    def update_weights_jit(
        x_current,
        h,
        y,
        zeta,
        beta,
        W_HX,
        W_YH,
        M_H,
        M_Y,
        D1,
        D2,
        MU_MH,
        MU_MY,
        MU_WHX,
        MU_WYH,
        muD,
        LayerMinimumGains,
        LayerMaximumGains,
        clip_gain_gradients=False,
        gain_grads_clipping_multiplier = 1,
        use_newton_steps_for_gains = False,
    ):
        """_summary_

        Args:
            x_current (_type_): _description_
            h (_type_): _description_
            y (_type_): _description_
            zeta (_type_): _description_
            beta (_type_): _description_
            W_HX (_type_): _description_
            W_YH (_type_): _description_
            M_H (_type_): _description_
            M_Y (_type_): _description_
            D1 (_type_): _description_
            D2 (_type_): _description_
            MUS (_type_): _description_
            muD (_type_): _description_
            LayerMinimumGains (_type_): _description_
            LayerMaximumGains (_type_): _description_
        """

        def clipping(inp, lev):
            out = inp * (np.abs(inp) <= lev) + lev * (inp > lev) - lev * (inp < -lev)
            return out
        D1_prev = D1
        D2_prev = D2

        M_H = (1 - MU_MH) * M_H + MU_MH * np.outer(h, h)
        W_HX = (1 - MU_WHX) * W_HX + MU_WHX * np.outer(h, x_current)

        M_Y = (1 - MU_MY) * M_Y + MU_MY * np.outer(y, y)
        W_YH = (1 - MU_WYH) * W_YH + MU_WYH * np.outer(y, h)

        D1derivative = (1 - zeta) * beta * (
            np.sum((np.abs(M_H) ** 2) * D1.T, axis=1)
            - np.sum(np.abs(W_HX) ** 2, axis=1)
        ).reshape(-1, 1) + zeta * (
            1 / D1
        )  

        D2derivative = (1 - zeta) * (1 - beta) * (
            np.sum((np.abs(M_Y) ** 2) * D2.T, axis=1)
            - np.sum(np.abs(W_YH) ** 2, axis=1)
        ).reshape(-1, 1) + zeta * (
            1 / D2
        ) 
        if use_newton_steps_for_gains:
            D1derivative = D1derivative / ((1 - zeta) * beta *(np.diag(M_H) ** 2).reshape(-1,1) * D1 - zeta * (1 / (D1 ** 2)))
            D2derivative = D2derivative / ((1 - zeta) * beta *(np.diag(M_Y) ** 2).reshape(-1,1) * D2 - zeta * (1 / (D2 ** 2)))

        if clip_gain_gradients:
            D1 = D1 - clipping(muD[0] * D1derivative, D1 * gain_grads_clipping_multiplier)
        else:
            D1 = D1 - muD[0] * D1derivative
        D1 = np.clip(D1, LayerMinimumGains[0], LayerMaximumGains[0])
        if clip_gain_gradients:
            D2 = D2 - clipping(muD[1] * D2derivative, D2 * gain_grads_clipping_multiplier)
        else:
            D2 = D2 - muD[1] * D2derivative
        D2 = np.clip(D2, LayerMinimumGains[1], LayerMaximumGains[1])
        if np.min(D1 - LayerMinimumGains[0]) < 0.1:
            D1 = D1_prev
        if np.min(D2 - LayerMinimumGains[1]) < 0.1:
            D2 = D2_prev
        return W_HX, W_YH, M_H, M_Y, D1, D2

    ###############################################################
    ############### NEURAL DYNAMICS ALGORITHMS ####################
    ###############################################################
    @staticmethod
    @njit
    def run_neural_dynamics_antisparse_jit(
        x_current,
        h,
        y,
        M_H,
        M_Y,
        W_HX,
        W_YH,
        D1,
        D2,
        beta,
        zeta,
        neural_dynamic_iterations,
        lr_start,
        lr_stop,
        lr_rule,
        lr_decay_multiplier=0.01,
        hidden_layer_gain=2,
        neural_fast_start = False,
        OUTPUT_COMP_TOL=1e-7,
    ):
        """_summary_

        Args:
            x_current (_type_): _description_
            h (_type_): _description_
            y (_type_): _description_
            M_H (_type_): _description_
            M_Y (_type_): _description_
            W_HX (_type_): _description_
            W_YH (_type_): _description_
            D1 (_type_): _description_
            D2 (_type_): _description_
            beta (_type_): _description_
            zeta (_type_): _description_
            neural_dynamic_iterations (_type_): _description_
            lr_start (_type_): _description_
            lr_stop (_type_): _description_
            OUTPUT_COMP_TOL (_type_): _description_
        """
        # def ddiag(A):
        #     return np.diag(np.diag(A))

        def offdiag(A, return_diag=False):
            if return_diag:
                diag = np.diag(A)
                return A - np.diag(diag), diag
            else:
                return A - np.diag(diag)

        if neural_fast_start:
            # Mapping from xt -> ht
            A = (1 - zeta) * (
                beta * ((D1 * M_H) * D1.T)
                + (1 - beta) * (M_H - W_YH.T @ np.linalg.solve(M_Y, W_YH))
            )
            b = (1 - zeta) * beta * (D1 * W_HX)
            WL1 = np.linalg.solve(A, b)
            # Mapping from ht -> yt
            WL2 = np.linalg.solve(M_Y * D2.T, W_YH)
            h = WL1 @ x_current
            y = WL2 @ h

        M_hat_H, Gamma_H = offdiag(M_H, True)
        M_hat_Y, Gamma_Y = offdiag(M_Y, True)

        mat_factor1 = (1 - zeta) * beta * (D1 * W_HX)
        mat_factor2 = (1 - zeta) * (1 - beta) * M_hat_H + (1 - zeta) * beta * (
            (D1 * M_hat_H) * D1.T
        )
        mat_factor3 = (1 - zeta) * (1 - beta) * (W_YH.T * D2.T)
        mat_factor4 = (1 - zeta) * Gamma_H * ((1 - beta) + beta * (D1.T) ** 2)
        mat_factor5 = M_hat_Y * D2.T
        mat_factor6 = Gamma_Y * D2.T

        v = mat_factor4[0] * h
        u = mat_factor6[0] * y

        PreviousMembraneVoltages = {"v": np.zeros_like(v), "u": np.zeros_like(u)}
        MembraneVoltageNotSettled = 1
        OutputCounter = 0
        while MembraneVoltageNotSettled & (OutputCounter < neural_dynamic_iterations):
            OutputCounter += 1
            if lr_rule == "constant":
                MUV = lr_start
            elif lr_rule == "divide_by_loop_index":
                MUV = max(lr_start / (1 + OutputCounter), lr_stop)
            elif lr_rule == "divide_by_slow_loop_index":
                MUV = max(lr_start / (1 + OutputCounter * lr_decay_multiplier), lr_stop)

            delv = -v + mat_factor1 @ x_current - mat_factor2 @ h + mat_factor3 @ y
            v = v + MUV * delv
            h = v / mat_factor4[0]
            h = np.clip(h, -hidden_layer_gain, hidden_layer_gain)
            delu = -u + W_YH @ h - mat_factor5 @ y
            u = u + MUV * delu
            y = u / mat_factor6[0]
            y = np.clip(y, -1, 1)

            MembraneVoltageNotSettled = 0
            if (
                np.linalg.norm(v - PreviousMembraneVoltages["v"]) / np.linalg.norm(v)
                > OUTPUT_COMP_TOL
            ) | (
                np.linalg.norm(u - PreviousMembraneVoltages["u"]) / np.linalg.norm(u)
                > OUTPUT_COMP_TOL
            ):
                MembraneVoltageNotSettled = 1
            PreviousMembraneVoltages["v"] = v
            PreviousMembraneVoltages["u"] = u

        return h, y, OutputCounter

    @staticmethod
    @njit
    def run_neural_dynamics_nnantisparse_jit(
        x_current,
        h,
        y,
        M_H,
        M_Y,
        W_HX,
        W_YH,
        D1,
        D2,
        beta,
        zeta,
        neural_dynamic_iterations,
        lr_start,
        lr_stop,
        lr_rule,
        lr_decay_multiplier=0.01,
        hidden_layer_gain=2,
        use_hopfield=True,
        neural_fast_start = False,
        OUTPUT_COMP_TOL=1e-7,
    ):
        """_summary_

        Args:
            x_current (_type_): _description_
            h (_type_): _description_
            y (_type_): _description_
            M_H (_type_): _description_
            M_Y (_type_): _description_
            W_HX (_type_): _description_
            W_YH (_type_): _description_
            D1 (_type_): _description_
            D2 (_type_): _description_
            beta (_type_): _description_
            zeta (_type_): _description_
            neural_dynamic_iterations (_type_): _description_
            lr_start (_type_): _description_
            lr_stop (_type_): _description_
            OUTPUT_COMP_TOL (_type_): _description_
        """

        def offdiag(A, return_diag=False):
            """_summary_

            Args:
                A (_type_): _description_
                return_diag (bool, optional): _description_. Defaults to False.

            Returns:
                _type_: _description_
            """
            if return_diag:
                diag = np.diag(A)
                return A - np.diag(diag), diag
            else:
                return A - np.diag(diag)
        if neural_fast_start:
            # Mapping from xt -> ht
            A = (1 - zeta) * (
                beta * ((D1 * M_H) * D1.T)
                + (1 - beta) * (M_H - W_YH.T @ np.linalg.solve(M_Y, W_YH))
            )
            b = (1 - zeta) * beta * (D1 * W_HX)
            WL1 = np.linalg.solve(A, b)
            # Mapping from ht -> yt
            WL2 = np.linalg.solve(M_Y * D2.T, W_YH)
            h = WL1 @ x_current
            y = WL2 @ h

        M_hat_H, Gamma_H = offdiag(M_H, True)
        M_hat_Y, Gamma_Y = offdiag(M_Y, True)

        mat_factor1 = (1 - zeta) * beta * (D1 * W_HX)
        mat_factor2 = (1 - zeta) * (1 - beta) * M_hat_H + (1 - zeta) * beta * (
            (D1 * M_hat_H) * D1.T
        )
        mat_factor3 = (1 - zeta) * (1 - beta) * (W_YH.T * D2.T)
        mat_factor4 = (1 - zeta) * Gamma_H * ((1 - beta) + beta * (D1.T) ** 2)
        mat_factor5 = M_hat_Y * D2.T
        mat_factor6 = Gamma_Y * D2.T

        v = mat_factor4[0] * h
        u = mat_factor6[0] * y

        PreviousMembraneVoltages = {"v": np.zeros_like(v), "u": np.zeros_like(u)}
        MembraneVoltageNotSettled = 1
        OutputCounter = 0
        while MembraneVoltageNotSettled & (OutputCounter < neural_dynamic_iterations):
            OutputCounter += 1
            if lr_rule == "constant":
                MUV = lr_start
            elif lr_rule == "divide_by_loop_index":
                MUV = max(lr_start / (1 + OutputCounter), lr_stop)
            elif lr_rule == "divide_by_slow_loop_index":
                MUV = max(lr_start / (1 + OutputCounter * lr_decay_multiplier), lr_stop)

            delv = -v + mat_factor1 @ x_current - mat_factor2 @ h + mat_factor3 @ y
            v = v + MUV * delv
            h = v / mat_factor4[0]
            h = np.clip(h, -hidden_layer_gain, hidden_layer_gain)
            delu = -u + W_YH @ h - mat_factor5 @ y
            u = u + MUV * delu
            y = u / mat_factor6[0]
            y = np.clip(y, 0, 1)

            MembraneVoltageNotSettled = 0
            if (
                np.linalg.norm(v - PreviousMembraneVoltages["v"]) / np.linalg.norm(v)
                > OUTPUT_COMP_TOL
            ) | (
                np.linalg.norm(u - PreviousMembraneVoltages["u"]) / np.linalg.norm(u)
                > OUTPUT_COMP_TOL
            ):
                MembraneVoltageNotSettled = 1
            PreviousMembraneVoltages["v"] = v
            PreviousMembraneVoltages["u"] = u

        return h, y, OutputCounter

    @staticmethod
    @njit
    def run_neural_dynamics_sparse_jit(
        x_current,
        h,
        y,
        M_H,
        M_Y,
        W_HX,
        W_YH,
        D1,
        D2,
        beta,
        zeta,
        neural_dynamic_iterations,
        lr_start,
        lr_stop,
        lr_rule,
        lr_decay_multiplier=0.005,
        stlambd_lr=1,
        hidden_layer_gain=100,
        neural_fast_start=False,
        mixtures_power_normalized=False,
        OUTPUT_COMP_TOL=1e-7,
    ):
        def offdiag(A, return_diag=False):
            """_summary_

            Args:
                A (_type_): _description_
                return_diag (bool, optional): _description_. Defaults to False.

            Returns:
                _type_: _description_
            """
            if return_diag:
                diag = np.diag(A)
                return A - np.diag(diag), diag
            else:
                return A - np.diag(diag)

        def SoftThresholding(X, thresh):
            X_absolute = np.abs(X)
            X_sign = np.sign(X)
            X_thresholded = (X_absolute > thresh) * (X_absolute - thresh) * X_sign
            return X_thresholded

        if neural_fast_start:
            # Mapping from xt -> ht
            A = (1 - zeta) * (
                beta * ((D1 * M_H) * D1.T)
                + (1 - beta) * (M_H - W_YH.T @ np.linalg.solve(M_Y, W_YH))
            )
            b = (1 - zeta) * beta * (D1 * W_HX)
            WL1 = np.linalg.solve(A, b)
            # Mapping from ht -> yt
            WL2 = np.linalg.solve(M_Y * D2.T, W_YH)
            h = WL1 @ x_current
            y = WL2 @ h
        M_hat_H, Gamma_H = offdiag(M_H, True)
        M_hat_Y, Gamma_Y = offdiag(M_Y, True)

        mat_factor1 = (1 - zeta) * beta * (D1 * W_HX)
        mat_factor2 = (1 - zeta) * (1 - beta) * M_hat_H + (1 - zeta) * beta * (
            (D1 * M_hat_H) * D1.T
        )
        mat_factor3 = (1 - zeta) * (1 - beta) * (W_YH.T * D2.T)
        mat_factor4 = (1 - zeta) * Gamma_H * ((1 - beta) + beta * (D1.T) ** 2)
        mat_factor5 = M_hat_Y * D2.T
        mat_factor6 = Gamma_Y * D2.T
        if mixtures_power_normalized:
            mat_factor6 = (1 - zeta) * Gamma_Y * ((1 - beta) + beta * D2.T**2)
            # mat_factor6 = (1 - zeta) * Gamma_Y * ((1 - beta) * D2.T ** 2)

        v = mat_factor4[0] * h
        u = mat_factor6[0] * y

        STLAMBD = 0
        PreviousMembraneVoltages = {"v": np.zeros_like(v), "u": np.zeros_like(u)}
        MembraneVoltageNotSettled = 1
        OutputCounter = 0
        while MembraneVoltageNotSettled & (OutputCounter < neural_dynamic_iterations):
            OutputCounter += 1
            if lr_rule == "constant":
                MUV = lr_start
            elif lr_rule == "divide_by_loop_index":
                MUV = max(lr_start / (1 + OutputCounter), lr_stop)
            elif lr_rule == "divide_by_slow_loop_index":
                MUV = max(lr_start / (1 + OutputCounter * lr_decay_multiplier), lr_stop)

            delv = -v + mat_factor1 @ x_current - mat_factor2 @ h + mat_factor3 @ y
            v = v + MUV * delv
            h = v / mat_factor4[0]
            h = np.clip(h, -hidden_layer_gain, hidden_layer_gain)
            delu = -u + W_YH @ h - mat_factor5 @ y
            u = u + MUV * delu
            y = u / mat_factor6[0]
            y = SoftThresholding(y, STLAMBD)
            # y = np.clip(y, -1, 1)

            dval = np.linalg.norm(y, 1) - 1

            STLAMBD = max(STLAMBD + stlambd_lr * dval, 0)

            MembraneVoltageNotSettled = 0
            if (
                np.linalg.norm(v - PreviousMembraneVoltages["v"]) / np.linalg.norm(v)
                > OUTPUT_COMP_TOL
            ) | (
                np.linalg.norm(u - PreviousMembraneVoltages["u"]) / np.linalg.norm(u)
                > OUTPUT_COMP_TOL
            ):
                MembraneVoltageNotSettled = 1
            PreviousMembraneVoltages["v"] = v
            PreviousMembraneVoltages["u"] = u

        return h, y, OutputCounter

    @staticmethod
    @njit
    def run_neural_dynamics_nnsparse_jit(
        x_current,
        h,
        y,
        M_H,
        M_Y,
        W_HX,
        W_YH,
        D1,
        D2,
        beta,
        zeta,
        neural_dynamic_iterations,
        lr_start,
        lr_stop,
        lr_rule,
        lr_decay_multiplier=0.005,
        stlambd_lr=0.2,
        hidden_layer_gain=100,
        neural_fast_start = False,
        OUTPUT_COMP_TOL=1e-7,
    ):
        def offdiag(A, return_diag=False):
            """_summary_

            Args:
                A (_type_): _description_
                return_diag (bool, optional): _description_. Defaults to False.

            Returns:
                _type_: _description_
            """
            if return_diag:
                diag = np.diag(A)
                return A - np.diag(diag), diag
            else:
                return A - np.diag(diag)
        if neural_fast_start:
            # Mapping from xt -> ht
            A = (1 - zeta) * (
                beta * ((D1 * M_H) * D1.T)
                + (1 - beta) * (M_H - W_YH.T @ np.linalg.solve(M_Y, W_YH))
            )
            b = (1 - zeta) * beta * (D1 * W_HX)
            WL1 = np.linalg.solve(A, b)
            # Mapping from ht -> yt
            WL2 = np.linalg.solve(M_Y * D2.T, W_YH)
            h = WL1 @ x_current
            y = WL2 @ h

        M_hat_H, Gamma_H = offdiag(M_H, True)
        M_hat_Y, Gamma_Y = offdiag(M_Y, True)

        mat_factor1 = (1 - zeta) * beta * (D1 * W_HX)
        mat_factor2 = (1 - zeta) * (1 - beta) * M_hat_H + (1 - zeta) * beta * (
            (D1 * M_hat_H) * D1.T
        )
        mat_factor3 = (1 - zeta) * (1 - beta) * (W_YH.T * D2.T)
        mat_factor4 = (1 - zeta) * Gamma_H * ((1 - beta) + beta * (D1.T) ** 2)
        mat_factor5 = M_hat_Y * D2.T
        mat_factor6 = Gamma_Y * D2.T

        v = mat_factor4[0] * h
        u = mat_factor6[0] * y

        STLAMBD = 0
        PreviousMembraneVoltages = {"v": np.zeros_like(v), "u": np.zeros_like(u)}
        MembraneVoltageNotSettled = 1
        OutputCounter = 0
        while MembraneVoltageNotSettled & (OutputCounter < neural_dynamic_iterations):
            OutputCounter += 1
            if lr_rule == "constant":
                MUV = lr_start
            elif lr_rule == "divide_by_loop_index":
                MUV = max(lr_start / (1 + OutputCounter), lr_stop)
            elif lr_rule == "divide_by_slow_loop_index":
                MUV = max(lr_start / (1 + OutputCounter * lr_decay_multiplier), lr_stop)

            delv = -v + mat_factor1 @ x_current - mat_factor2 @ h + mat_factor3 @ y
            v = v + MUV * delv
            h = v / mat_factor4[0]
            h = np.clip(h, -hidden_layer_gain, hidden_layer_gain)
            delu = -u + W_YH @ h - mat_factor5 @ y
            u = u + MUV * delu
            y = u / mat_factor6[0]
            y = np.maximum(y - STLAMBD, 0)
            # y = np.clip(y, 0, 1)

            dval = np.linalg.norm(y, 1) - 1

            STLAMBD = max(STLAMBD + stlambd_lr * dval, 0)

            MembraneVoltageNotSettled = 0
            if (
                np.linalg.norm(v - PreviousMembraneVoltages["v"]) / np.linalg.norm(v)
                > OUTPUT_COMP_TOL
            ) | (
                np.linalg.norm(u - PreviousMembraneVoltages["u"]) / np.linalg.norm(u)
                > OUTPUT_COMP_TOL
            ):
                MembraneVoltageNotSettled = 1
            PreviousMembraneVoltages["v"] = v
            PreviousMembraneVoltages["u"] = u

        return h, y, OutputCounter

    @staticmethod
    @njit
    def run_neural_dynamics_simplex_jit(
        x_current,
        h,
        y,
        M_H,
        M_Y,
        W_HX,
        W_YH,
        D1,
        D2,
        beta,
        zeta,
        neural_dynamic_iterations,
        lr_start,
        lr_stop,
        lr_rule,
        lr_decay_multiplier=0.005,
        STLAMBD=None,
        stlambd_lr=0.01,
        hidden_layer_gain=100,
        neural_fast_start = False,
        OUTPUT_COMP_TOL=1e-7,
    ):
        def offdiag(A, return_diag=False):
            """_summary_

            Args:
                A (_type_): _description_
                return_diag (bool, optional): _description_. Defaults to False.

            Returns:
                _type_: _description_
            """
            if return_diag:
                diag = np.diag(A)
                return A - np.diag(diag), diag
            else:
                return A - np.diag(diag)

        if neural_fast_start:
            # Mapping from xt -> ht
            A = (1 - zeta) * (
                beta * ((D1 * M_H) * D1.T)
                + (1 - beta) * (M_H - W_YH.T @ np.linalg.solve(M_Y, W_YH))
            )
            b = (1 - zeta) * beta * (D1 * W_HX)
            WL1 = np.linalg.solve(A, b)
            # Mapping from ht -> yt
            WL2 = np.linalg.solve(M_Y * D2.T, W_YH)
            h = WL1 @ x_current
            y = WL2 @ h

        M_hat_H, Gamma_H = offdiag(M_H, True)
        M_hat_Y, Gamma_Y = offdiag(M_Y, True)

        mat_factor1 = (1 - zeta) * beta * (D1 * W_HX)
        mat_factor2 = (1 - zeta) * (1 - beta) * M_hat_H + (1 - zeta) * beta * (
            (D1 * M_hat_H) * D1.T
        )
        mat_factor3 = (1 - zeta) * (1 - beta) * (W_YH.T * D2.T)
        mat_factor4 = (1 - zeta) * Gamma_H * ((1 - beta) + beta * (D1.T) ** 2)
        mat_factor5 = M_hat_Y * D2.T
        mat_factor6 = Gamma_Y * D2.T

        v = mat_factor4[0] * h
        u = mat_factor6[0] * y
        if STLAMBD is None:
            STLAMBD = 0
        PreviousMembraneVoltages = {"v": np.zeros_like(v), "u": np.zeros_like(u)}
        MembraneVoltageNotSettled = 1
        OutputCounter = 0
        while MembraneVoltageNotSettled & (OutputCounter < neural_dynamic_iterations):
            OutputCounter += 1
            if lr_rule == "constant":
                MUV = lr_start
            elif lr_rule == "divide_by_loop_index":
                MUV = max(lr_start / (1 + OutputCounter), lr_stop)
            elif lr_rule == "divide_by_slow_loop_index":
                MUV = max(lr_start / (1 + OutputCounter * lr_decay_multiplier), lr_stop)
            # MUV = max(lr_start/(1+OutputCounter*0.005), lr_stop)
            delv = -v + mat_factor1 @ x_current - mat_factor2 @ h + mat_factor3 @ y
            v = v + MUV * delv
            h = v / mat_factor4[0]
            h = np.clip(h, -hidden_layer_gain, hidden_layer_gain)
            # h = h*(h>=-2.0)*(h<=2.0)+(h>2.0)*2.0-2.0*(h<-2.0)
            delu = -u + W_YH @ h - mat_factor5 @ y
            u = u + MUV * delu
            y = u / mat_factor6[0]

            y = np.maximum(y - STLAMBD, 0)
            dval = np.sum(y) - 1
            STLAMBD = STLAMBD + stlambd_lr * dval

            MembraneVoltageNotSettled = 0
            if (
                np.linalg.norm(v - PreviousMembraneVoltages["v"]) / np.linalg.norm(v)
                > OUTPUT_COMP_TOL
            ) | (
                np.linalg.norm(u - PreviousMembraneVoltages["u"]) / np.linalg.norm(u)
                > OUTPUT_COMP_TOL
            ):
                MembraneVoltageNotSettled = 1
            PreviousMembraneVoltages["v"] = v
            PreviousMembraneVoltages["u"] = u

        return h, y, STLAMBD, OutputCounter

    @staticmethod
    @njit
    def run_neural_dynamics_general_polytope_jit(
        x_current,
        h,
        y,
        signed_dims,
        nn_dims,
        sparse_dims_list,
        M_H,
        M_Y,
        W_HX,
        W_YH,
        D1,
        D2,
        beta,
        zeta,
        neural_dynamic_iterations,
        lr_start,
        lr_stop,
        lr_rule,
        lr_decay_multiplier=0.005,
        stlambd_lr=1,
        hidden_layer_gain=100,
        OUTPUT_COMP_TOL=1e-7,
    ):
        def offdiag(A, return_diag=False):
            """_summary_

            Args:
                A (_type_): _description_
                return_diag (bool, optional): _description_. Defaults to False.

            Returns:
                _type_: _description_
            """
            if return_diag:
                diag = np.diag(A)
                return A - np.diag(diag), diag
            else:
                return A - np.diag(diag)

        def SoftThresholding(X, thresh):
            X_absolute = np.abs(X)
            X_sign = np.sign(X)
            X_thresholded = (X_absolute > thresh) * (X_absolute - thresh) * X_sign
            return X_thresholded

        def loop_intersection(lst1, lst2):
            result = []
            for element1 in lst1:
                for element2 in lst2:
                    if element1 == element2:
                        result.append(element1)
            return result

        M_hat_H, Gamma_H = offdiag(M_H, True)
        M_hat_Y, Gamma_Y = offdiag(M_Y, True)

        mat_factor1 = (1 - zeta) * beta * (D1 * W_HX)
        mat_factor2 = (1 - zeta) * (1 - beta) * M_hat_H + (1 - zeta) * beta * (
            (D1 * M_hat_H) * D1.T
        )
        mat_factor3 = (1 - zeta) * (1 - beta) * (W_YH.T * D2.T)
        mat_factor4 = (1 - zeta) * Gamma_H * ((1 - beta) + beta * (D1.T) ** 2)
        mat_factor5 = M_hat_Y * D2.T
        mat_factor6 = Gamma_Y * D2.T

        v = mat_factor4[0] * h
        u = mat_factor6[0] * y

        STLAMBD_list = np.zeros(len(sparse_dims_list))
        PreviousMembraneVoltages = {"v": np.zeros_like(v), "u": np.zeros_like(u)}
        MembraneVoltageNotSettled = 1
        OutputCounter = 0
        while MembraneVoltageNotSettled & (OutputCounter < neural_dynamic_iterations):
            OutputCounter += 1
            if lr_rule == "constant":
                MUV = lr_start
            elif lr_rule == "divide_by_loop_index":
                MUV = max(lr_start / (1 + OutputCounter), lr_stop)
            elif lr_rule == "divide_by_slow_loop_index":
                MUV = max(lr_start / (1 + OutputCounter * lr_decay_multiplier), lr_stop)

            delv = -v + mat_factor1 @ x_current - mat_factor2 @ h + mat_factor3 @ y
            v = v + MUV * delv
            h = v / mat_factor4[0]
            h = np.clip(h, -hidden_layer_gain, hidden_layer_gain)
            delu = -u + W_YH @ h - mat_factor5 @ y
            u = u + MUV * delu
            y = u / mat_factor6[0]
            if sparse_dims_list[0][0] != -1:
                for ss, sparse_dim in enumerate(sparse_dims_list):
                    # y[sparse_dim] = SoftThresholding(y[sparse_dim], STLAMBD_list[ss])
                    # STLAMBD_list[ss] = max(STLAMBD_list[ss] + (np.linalg.norm(y[sparse_dim],1) - 1), 0)
                    if signed_dims[0] != -1:
                        y[
                            np.array(loop_intersection(sparse_dim, signed_dims))
                        ] = SoftThresholding(
                            y[np.array(loop_intersection(sparse_dim, signed_dims))],
                            STLAMBD_list[ss],
                        )
                    if nn_dims[0] != -1:
                        y[
                            np.array(loop_intersection(sparse_dim, nn_dims))
                        ] = np.maximum(
                            y[np.array(loop_intersection(sparse_dim, nn_dims))]
                            - STLAMBD_list[ss],
                            0,
                        )
                    STLAMBD_list[ss] = max(
                        STLAMBD_list[ss]
                        + stlambd_lr * (np.linalg.norm(y[sparse_dim], 1) - 1),
                        0,
                    )
            if signed_dims[0] != -1:
                y[signed_dims] = np.clip(y[signed_dims], -1, 1)
            if nn_dims[0] != -1:
                y[nn_dims] = np.clip(y[nn_dims], 0, 1)

            MembraneVoltageNotSettled = 0
            if (
                np.linalg.norm(v - PreviousMembraneVoltages["v"]) / np.linalg.norm(v)
                > OUTPUT_COMP_TOL
            ) | (
                np.linalg.norm(u - PreviousMembraneVoltages["u"]) / np.linalg.norm(u)
                > OUTPUT_COMP_TOL
            ):
                MembraneVoltageNotSettled = 1
            PreviousMembraneVoltages["v"] = v
            PreviousMembraneVoltages["u"] = u

        return h, y, OutputCounter

    ###############################################################
    ######FIT NEXT FUNCTIONS FOR ONLINE LEARNING SETTING ##########
    ###############################################################

    def fit_next_antisparse(
        self,
        x_current,
        neural_dynamic_iterations=750,
        neural_lr_start=0.2,
        neural_lr_stop=0.05,
        return_output=False,
    ):
        gamma_start, gamma_stop, beta, zeta, muD, W_HX, W_YH, M_H, M_Y, D1, D2 = (
            self.gamma_start,
            self.gamma_stop,
            self.beta,
            self.zeta,
            np.array(self.muD),
            self.W_HX,
            self.W_YH,
            self.M_H,
            self.M_Y,
            self.D1,
            self.D2,
        )
        neural_OUTPUT_COMP_TOL = self.neural_OUTPUT_COMP_TOL
        LayerMinimumGains = self.LayerMinimumGains
        LayerMaximumGains = self.LayerMaximumGains

        i_sample = self.sample_index

        s_dim = self.s_dim
        h_dim = self.h_dim

        h = np.zeros((h_dim,))
        y = np.zeros((s_dim,))

        h, y, _ = self.run_neural_dynamics_antisparse_jit(
            x_current=x_current,
            h=h,
            y=y,
            M_H=M_H,
            M_Y=M_Y,
            W_HX=W_HX,
            W_YH=W_YH,
            D1=D1,
            D2=D2,
            beta=beta,
            zeta=zeta,
            neural_dynamic_iterations=neural_dynamic_iterations,
            lr_start=neural_lr_start,
            lr_stop=neural_lr_stop,
            OUTPUT_COMP_TOL=neural_OUTPUT_COMP_TOL,
        )

        MUS = np.max([gamma_start / (1 + np.log(2 + i_sample)), gamma_stop])

        W_HX, W_YH, M_H, M_Y, D1, D2 = self.update_weights_jit(
            x_current,
            h,
            y,
            zeta,
            beta,
            W_HX,
            W_YH,
            M_H,
            M_Y,
            D1,
            D2,
            MUS,
            muD,
            LayerMinimumGains,
            LayerMaximumGains,
        )

        self.W_HX = W_HX
        self.W_YH = W_YH
        self.M_H = M_H
        self.M_Y = M_Y
        self.D1 = D1
        self.D2 = D2
        self.sample_index = i_sample + 1
        if return_output:
            return h, y
        else:
            return None, None

    ####################################################################
    ## FIT BATCH FUNCTIONS IF ALL THE OBSERVATIONS ARE AVAILABLE      ##
    ## THESE FUNCTIONS ALSO FIT IN ONLINE MANNER. YOU CAN CONSIDER    ##
    ## THEM AS EXTENSIONS OF FIT NEXT FUNCTIONS ABOVE (FOR DEBUGGING) ##
    ####################################################################
    def fit_batch_antisparse(
        self,
        X,
        n_epochs=5,
        neural_dynamic_iterations=750,
        neural_lr_start=0.2,
        neural_lr_stop=0.05,
        synaptic_lr_rule="divide_by_log_index",
        neural_loop_lr_rule="divide_by_slow_loop_index",
        neural_fast_start = False,
        synaptic_lr_decay_divider=5000,
        neural_lr_decay_multiplier=0.005,
        hidden_layer_gain=10,
        clip_gain_gradients=False,
        gain_grads_clipping_multiplier = 1,
        use_newton_steps_for_gains = False,
        shuffle=True,
        debug_iteration_point=1000,
        plot_in_jupyter=False,
    ):

        #  (self, X, n_epochs = 5, neural_dynamic_iterations = 750, neural_lr_start = 0.2, neural_lr_stop = 0.05,
        #    synaptic_lr_rule = "divide_by_log_index", neural_loop_lr_rule = "divide_by_slow_loop_index",
        #    hidden_layer_gain = 10, clip_gain_gradients = True, shuffle = True, debug_iteration_point = 1000,
        #    plot_in_jupyter = False)
        """_summary_

        Args:
            X (_type_): _description_
            n_epochs (int, optional): _description_. Defaults to 5.
            neural_dynamic_iterations (int, optional): _description_. Defaults to 750.
            neural_lr_start (float, optional): _description_. Defaults to 0.2.
            neural_lr_stop (float, optional): _description_. Defaults to 0.05.
            shuffle (bool, optional): _description_. Defaults to True.
            debug_iteration_point (int, optional): _description_. Defaults to 1000.
            plot_in_jupyter (bool, optional): _description_. Defaults to False.
        """
        (
            gammaM_start,
            gammaM_stop,
            gammaW_start,
            gammaW_stop,
            beta,
            zeta,
            muD,
            W_HX,
            W_YH,
            M_H,
            M_Y,
            D1,
            D2,
        ) = (
            self.gammaM_start,
            self.gammaM_stop,
            self.gammaW_start,
            self.gammaW_stop,
            self.beta,
            self.zeta,
            np.array(self.muD),
            self.W_HX,
            self.W_YH,
            self.M_H,
            self.M_Y,
            self.D1,
            self.D2,
        )
        LayerMinimumGains = self.LayerMinimumGains
        LayerMaximumGains = self.LayerMaximumGains
        neural_OUTPUT_COMP_TOL = self.neural_OUTPUT_COMP_TOL
        debugging = self.set_ground_truth

        assert (
            X.shape[0] == self.x_dim
        ), "You must input the transpose, or you need to change one of the following hyperparameters: s_dim, x_dim"
        D1list = []
        D2list = []
        self.SV_list = []
        s_dim = self.s_dim
        h_dim = self.h_dim
        samples = X.shape[1]

        if self.Y is None:
            H = np.zeros((h_dim, samples))
            Y = np.zeros((s_dim, samples))
        else:
            H, Y = self.H, self.Y

        if debugging:
            SIR_list = self.SIR_list
            SNR_list = self.SNR_list
            S = self.S
            A = self.A
            plt.figure(figsize=(70, 50), dpi=80)

        for k in range(n_epochs):
            if shuffle:
                idx = np.random.permutation(samples)
            else:
                idx = np.arange(samples)

            for i_sample in tqdm(range(samples)):

                if ((i_sample + 1) % 100000) == 0:
                    muD = 0.99 * np.array(muD)

                x_current = X[:, idx[i_sample]]  # Take one input

                y = Y[:, idx[i_sample]]

                h = H[:, idx[i_sample]]

                h, y, _ = self.run_neural_dynamics_antisparse_jit(
                    x_current=x_current,
                    h=h,
                    y=y,
                    M_H=M_H,
                    M_Y=M_Y,
                    W_HX=W_HX,
                    W_YH=W_YH,
                    D1=D1,
                    D2=D2,
                    beta=beta,
                    zeta=zeta,
                    neural_dynamic_iterations=neural_dynamic_iterations,
                    lr_start=neural_lr_start,
                    lr_stop=neural_lr_stop,
                    lr_rule=neural_loop_lr_rule,
                    lr_decay_multiplier=neural_lr_decay_multiplier,
                    hidden_layer_gain=hidden_layer_gain,
                    neural_fast_start = neural_fast_start,
                    OUTPUT_COMP_TOL=neural_OUTPUT_COMP_TOL,
                )

                if synaptic_lr_rule == "constant":
                    MU_MH = gammaM_start[0]
                    MU_MY = gammaM_start[1]
                    MU_WHX = gammaW_start[0]
                    MU_WYH = gammaW_start[1]
                elif synaptic_lr_rule == "divide_by_log_index":
                    # MUS = np.max([gamma_start/(1 + np.log(2 + (i_sample))), gamma_stop])
                    MU_MH = np.max(
                        [
                            gammaM_start[0]
                            / (1 + np.log(2 + (i_sample // synaptic_lr_decay_divider))),
                            gammaM_stop[0],
                        ]
                    )
                    MU_MY = np.max(
                        [
                            gammaM_start[1]
                            / (1 + np.log(2 + (i_sample // synaptic_lr_decay_divider))),
                            gammaM_stop[1],
                        ]
                    )
                    MU_WHX = np.max(
                        [
                            gammaW_start[0]
                            / (1 + np.log(2 + (i_sample // synaptic_lr_decay_divider))),
                            gammaW_stop[0],
                        ]
                    )
                    MU_WYH = np.max(
                        [
                            gammaW_start[1]
                            / (1 + np.log(2 + (i_sample // synaptic_lr_decay_divider))),
                            gammaW_stop[1],
                        ]
                    )
                elif synaptic_lr_rule == "divide_by_index":
                    MU_MH = np.max(
                        [
                            gammaM_start[0]
                            / (i_sample // synaptic_lr_decay_divider + 1),
                            gammaM_stop[0],
                        ]
                    )
                    MU_MY = np.max(
                        [
                            gammaM_start[1]
                            / (i_sample // synaptic_lr_decay_divider + 1),
                            gammaM_stop[1],
                        ]
                    )
                    MU_WHX = np.max(
                        [
                            gammaW_start[0]
                            / (i_sample // synaptic_lr_decay_divider + 1),
                            gammaW_stop[0],
                        ]
                    )
                    MU_WYH = np.max(
                        [
                            gammaW_start[1]
                            / (i_sample // synaptic_lr_decay_divider + 1),
                            gammaW_stop[1],
                        ]
                    )

                W_HX, W_YH, M_H, M_Y, D1, D2 = self.update_weights_jit(
                    x_current,
                    h,
                    y,
                    zeta,
                    beta,
                    W_HX,
                    W_YH,
                    M_H,
                    M_Y,
                    D1,
                    D2,
                    MU_MH,
                    MU_MY,
                    MU_WHX,
                    MU_WYH,
                    muD,
                    LayerMinimumGains,
                    LayerMaximumGains,
                    clip_gain_gradients,
                    gain_grads_clipping_multiplier,
                    use_newton_steps_for_gains = use_newton_steps_for_gains,
                )

                Y[:, idx[i_sample]] = y
                H[:, idx[i_sample]] = h

                if debugging:
                    if (i_sample % debug_iteration_point) == 0:
                        try:
                            W = self.compute_overall_mapping_jit(
                                beta, zeta, D1, D2, M_H, M_Y, W_HX, W_YH
                            )
                            self.W = W

                            (
                                SINR_current,
                                SNR_current,
                                SGG,
                                Y_,
                                P,
                            ) = self.evaluate_for_debug(W, A, S, X)

                            self.SV_list.append(abs(SGG))

                            SNR_list.append(SNR_current)
                            SIR_list.append(SINR_current)

                            if plot_in_jupyter:
                                D1list.append(
                                    D1.reshape(
                                        -1,
                                    )
                                )
                                D2list.append(
                                    D2.reshape(
                                        -1,
                                    )
                                )
                                YforPlot = Y[:, idx[i_sample - 25 : i_sample]].T
                                self.plot_for_debug(
                                    SIR_list,
                                    SNR_list,
                                    D1list,
                                    D2list,
                                    P,
                                    debug_iteration_point,
                                    YforPlot,
                                )

                            self.W_HX = W_HX
                            self.W_YH = W_YH
                            self.M_H = M_H
                            self.M_Y = M_Y
                            self.D1 = D1
                            self.D2 = D2

                            self.H = H
                            self.Y = Y
                            self.SIR_list = SIR_list
                            self.SNR_list = SNR_list
                        except Exception as e:
                            print(str(e))
        self.W_HX = W_HX
        self.W_YH = W_YH
        self.M_H = M_H
        self.M_Y = M_Y
        self.D1 = D1
        self.D2 = D2

        self.H = H
        self.Y = Y
        self.SIR_list = SIR_list
        self.SNR_list = SNR_list

    def fit_batch_nnantisparse(
        self,
        X,
        n_epochs=5,
        neural_dynamic_iterations=750,
        neural_lr_start=0.2,
        neural_lr_stop=0.05,
        synaptic_lr_rule="divide_by_log_index",
        neural_loop_lr_rule="divide_by_slow_loop_index",
        neural_fast_start = False,
        synaptic_lr_decay_divider=5000,
        neural_lr_decay_multiplier=0.005,
        hidden_layer_gain=10,
        clip_gain_gradients=True,
        gain_grads_clipping_multiplier = 1,
        use_newton_steps_for_gains = False,
        shuffle=True,
        debug_iteration_point=1000,
        plot_in_jupyter=False,
    ):
        """_summary_

        Args:
            X (_type_): _description_
            n_epochs (int, optional): _description_. Defaults to 5.
            neural_dynamic_iterations (int, optional): _description_. Defaults to 750.
            neural_lr_start (float, optional): _description_. Defaults to 0.2.
            neural_lr_stop (float, optional): _description_. Defaults to 0.05.
            shuffle (bool, optional): _description_. Defaults to True.
            debug_iteration_point (int, optional): _description_. Defaults to 1000.
            plot_in_jupyter (bool, optional): _description_. Defaults to False.
        """
        (
            gammaM_start,
            gammaM_stop,
            gammaW_start,
            gammaW_stop,
            beta,
            zeta,
            muD,
            W_HX,
            W_YH,
            M_H,
            M_Y,
            D1,
            D2,
        ) = (
            self.gammaM_start,
            self.gammaM_stop,
            self.gammaW_start,
            self.gammaW_stop,
            self.beta,
            self.zeta,
            np.array(self.muD),
            self.W_HX,
            self.W_YH,
            self.M_H,
            self.M_Y,
            self.D1,
            self.D2,
        )
        LayerMinimumGains = self.LayerMinimumGains
        LayerMaximumGains = self.LayerMaximumGains
        debugging = self.set_ground_truth

        assert (
            X.shape[0] == self.x_dim
        ), "You must input the transpose, or you need to change one of the following hyperparameters: s_dim, x_dim"
        D1list = []
        D2list = []
        self.SV_list = []
        s_dim = self.s_dim
        h_dim = self.h_dim
        samples = X.shape[1]

        if self.Y is None:
            H = np.zeros((h_dim, samples))
            Y = np.zeros((s_dim, samples))
        else:
            H, Y = self.H, self.Y

        if debugging:
            SIR_list = self.SIR_list
            SNR_list = self.SNR_list
            S = self.S
            A = self.A
            Szeromean = S - S.mean(axis=1).reshape(-1, 1)
            plt.figure(figsize=(70, 50), dpi=80)

        for k in range(n_epochs):
            if shuffle:
                idx = np.random.permutation(samples)
            else:
                idx = np.arange(samples)

            for i_sample in tqdm(range(samples)):

                if ((i_sample + 1) % 100000) == 0:
                    muD = 0.99 * np.array(muD)

                x_current = X[:, idx[i_sample]]  # Take one input

                y = Y[:, idx[i_sample]]

                h = H[:, idx[i_sample]]
                neural_OUTPUT_COMP_TOL = self.neural_OUTPUT_COMP_TOL

                h, y, _ = self.run_neural_dynamics_nnantisparse_jit(
                    x_current=x_current,
                    h=h,
                    y=y,
                    M_H=M_H,
                    M_Y=M_Y,
                    W_HX=W_HX,
                    W_YH=W_YH,
                    D1=D1,
                    D2=D2,
                    beta=beta,
                    zeta=zeta,
                    neural_dynamic_iterations=neural_dynamic_iterations,
                    lr_start=neural_lr_start,
                    lr_stop=neural_lr_stop,
                    lr_rule=neural_loop_lr_rule,
                    lr_decay_multiplier=neural_lr_decay_multiplier,
                    hidden_layer_gain=hidden_layer_gain,
                    neural_fast_start = neural_fast_start,
                    OUTPUT_COMP_TOL=neural_OUTPUT_COMP_TOL,
                )

                if synaptic_lr_rule == "constant":
                    MU_MH = gammaM_start[0]
                    MU_MY = gammaM_start[1]
                    MU_WHX = gammaW_start[0]
                    MU_WYH = gammaW_start[1]
                elif synaptic_lr_rule == "divide_by_log_index":
                    # MUS = np.max([gamma_start/(1 + np.log(2 + (i_sample))), gamma_stop])
                    MU_MH = np.max(
                        [
                            gammaM_start[0]
                            / (1 + np.log(1 + (i_sample // synaptic_lr_decay_divider))/10),
                            gammaM_stop[0],
                        ]
                    )
                    MU_MY = np.max(
                        [
                            gammaM_start[1]
                            / (1 + np.log(1 + (i_sample // synaptic_lr_decay_divider))/10),
                            gammaM_stop[1],
                        ]
                    )
                    MU_WHX = np.max(
                        [
                            gammaW_start[0]
                            / (1 + np.log(1 + (i_sample // synaptic_lr_decay_divider))/10),
                            gammaW_stop[0],
                        ]
                    )
                    MU_WYH = np.max(
                        [
                            gammaW_start[1]
                            / (1 + np.log(1 + (i_sample // synaptic_lr_decay_divider))/10),
                            gammaW_stop[1],
                        ]
                    )
                elif synaptic_lr_rule == "divide_by_index":
                    MU_MH = np.max([gammaM_start[0] / (i_sample + 1), gammaM_stop[0]])
                    MU_MY = np.max([gammaM_start[1] / (i_sample + 1), gammaM_stop[1]])
                    MU_WHX = np.max([gammaW_start[0] / (i_sample + 1), gammaW_stop[0]])
                    MU_WYH = np.max([gammaW_start[1] / (i_sample + 1), gammaW_stop[1]])

                W_HX, W_YH, M_H, M_Y, D1, D2 = self.update_weights_jit(
                    x_current = x_current,
                    h = h,
                    y = y,
                    zeta = zeta,
                    beta = beta,
                    W_HX = W_HX,
                    W_YH = W_YH,
                    M_H = M_H,
                    M_Y = M_Y,
                    D1 = D1,
                    D2 = D2,
                    MU_MH = MU_MH,
                    MU_MY = MU_MY,
                    MU_WHX = MU_WHX,
                    MU_WYH = MU_WYH,
                    muD = muD,
                    LayerMinimumGains = LayerMinimumGains,
                    LayerMaximumGains = LayerMaximumGains,
                    clip_gain_gradients = clip_gain_gradients,
                    gain_grads_clipping_multiplier = gain_grads_clipping_multiplier,
                    use_newton_steps_for_gains = use_newton_steps_for_gains,
                )

                Y[:, idx[i_sample]] = y
                H[:, idx[i_sample]] = h

                if debugging:
                    if (i_sample % debug_iteration_point) == 0:
                        try:
                            W = self.compute_overall_mapping_jit(
                                beta, zeta, D1, D2, M_H, M_Y, W_HX, W_YH
                            )
                            self.W = W

                            (
                                SINR_current,
                                SNR_current,
                                SGG,
                                Y_,
                                P,
                            ) = self.evaluate_for_debugV2(W, A, S, X, False)

                            self.SV_list.append(abs(SGG))

                            SNR_list.append(SNR_current)
                            SIR_list.append(SINR_current)

                            if plot_in_jupyter:
                                D1list.append(
                                    D1.reshape(
                                        -1,
                                    )
                                )
                                D2list.append(
                                    D2.reshape(
                                        -1,
                                    )
                                )
                                YforPlot = Y[:, idx[i_sample - 25 : i_sample]].T
                                self.plot_for_debug(
                                    SIR_list,
                                    SNR_list,
                                    D1list,
                                    D2list,
                                    P,
                                    debug_iteration_point,
                                    YforPlot,
                                )

                            self.W_HX = W_HX
                            self.W_YH = W_YH
                            self.M_H = M_H
                            self.M_Y = M_Y
                            self.D1 = D1
                            self.D2 = D2

                            self.H = H
                            self.Y = Y
                            self.SIR_list = SIR_list
                            self.SNR_list = SNR_list
                        except Exception as e:
                            print(str(e))
        self.W_HX = W_HX
        self.W_YH = W_YH
        self.M_H = M_H
        self.M_Y = M_Y
        self.D1 = D1
        self.D2 = D2

        self.H = H
        self.Y = Y
        self.SIR_list = SIR_list
        self.SNR_list = SNR_list

    def fit_batch_sparse(
        self,
        X,
        n_epochs=5,
        neural_dynamic_iterations=750,
        neural_lr_start=0.2,
        neural_lr_stop=0.05,
        stlambd_lr=1,
        synaptic_lr_rule="divide_by_log_index",
        neural_loop_lr_rule="divide_by_slow_loop_index",
        neural_fast_start=False,
        synaptic_lr_decay_divider=5000,
        neural_lr_decay_multiplier=0.005,
        hidden_layer_gain=10,
        clip_gain_gradients=False,
        gain_grads_clipping_multiplier = 1,
        use_newton_steps_for_gains = False,
        mixtures_power_normalized=False,
        shuffle=True,
        debug_iteration_point=1000,
        plot_in_jupyter=False,
    ):

        (
            gammaM_start,
            gammaM_stop,
            gammaW_start,
            gammaW_stop,
            beta,
            zeta,
            muD,
            W_HX,
            W_YH,
            M_H,
            M_Y,
            D1,
            D2,
        ) = (
            self.gammaM_start,
            self.gammaM_stop,
            self.gammaW_start,
            self.gammaW_stop,
            self.beta,
            self.zeta,
            np.array(self.muD),
            self.W_HX,
            self.W_YH,
            self.M_H,
            self.M_Y,
            self.D1,
            self.D2,
        )
        LayerMinimumGains = self.LayerMinimumGains
        LayerMaximumGains = self.LayerMaximumGains
        debugging = self.set_ground_truth

        assert (
            X.shape[0] == self.x_dim
        ), "You must input the transpose, or you need to change one of the following hyperparameters: s_dim, x_dim"
        D1list = []
        D2list = []
        self.SV_list = []
        s_dim = self.s_dim
        h_dim = self.h_dim
        samples = X.shape[1]

        if self.Y is None:
            H = np.zeros((h_dim, samples))
            Y = np.zeros((s_dim, samples))
        else:
            H, Y = self.H, self.Y

        if debugging:
            SIR_list = self.SIR_list
            SNR_list = self.SNR_list
            S = self.S
            A = self.A
            plt.figure(figsize=(70, 50), dpi=80)

        for k in range(n_epochs):
            if shuffle:
                idx = np.random.permutation(samples)
            else:
                idx = np.arange(samples)

            for i_sample in tqdm(range(samples)):

                if ((i_sample + 1) % 100000) == 0:
                    muD = 0.99 * np.array(muD)

                x_current = X[:, idx[i_sample]]  # Take one input

                y = Y[:, idx[i_sample]]

                h = H[:, idx[i_sample]]
                neural_OUTPUT_COMP_TOL = self.neural_OUTPUT_COMP_TOL

                h, y, _ = self.run_neural_dynamics_sparse_jit(
                    x_current=x_current,
                    h=h,
                    y=y,
                    M_H=M_H,
                    M_Y=M_Y,
                    W_HX=W_HX,
                    W_YH=W_YH,
                    D1=D1,
                    D2=D2,
                    beta=beta,
                    zeta=zeta,
                    neural_dynamic_iterations=neural_dynamic_iterations,
                    lr_start=neural_lr_start,
                    lr_stop=neural_lr_stop,
                    lr_rule=neural_loop_lr_rule,
                    lr_decay_multiplier=neural_lr_decay_multiplier,
                    stlambd_lr=stlambd_lr,
                    hidden_layer_gain=hidden_layer_gain,
                    neural_fast_start=neural_fast_start,
                    mixtures_power_normalized=mixtures_power_normalized,
                    OUTPUT_COMP_TOL=neural_OUTPUT_COMP_TOL,
                )

                if synaptic_lr_rule == "constant":
                    MU_MH = gammaM_start[0]
                    MU_MY = gammaM_start[1]
                    MU_WHX = gammaW_start[0]
                    MU_WYH = gammaW_start[1]
                elif synaptic_lr_rule == "divide_by_log_index":
                    # MUS = np.max([gamma_start/(1 + np.log(2 + (i_sample))), gamma_stop])
                    MU_MH = np.max(
                        [
                            gammaM_start[0]
                            / (1 + np.log(2 + (i_sample // synaptic_lr_decay_divider))),
                            gammaM_stop[0],
                        ]
                    )
                    MU_MY = np.max(
                        [
                            gammaM_start[1]
                            / (1 + np.log(2 + (i_sample // synaptic_lr_decay_divider))),
                            gammaM_stop[1],
                        ]
                    )
                    MU_WHX = np.max(
                        [
                            gammaW_start[0]
                            / (1 + np.log(2 + (i_sample // synaptic_lr_decay_divider))),
                            gammaW_stop[0],
                        ]
                    )
                    MU_WYH = np.max(
                        [
                            gammaW_start[1]
                            / (1 + np.log(2 + (i_sample // synaptic_lr_decay_divider))),
                            gammaW_stop[1],
                        ]
                    )
                elif synaptic_lr_rule == "divide_by_index":
                    MU_MH = np.max([gammaM_start[0] / (i_sample + 1), gammaM_stop[0]])
                    MU_MY = np.max([gammaM_start[1] / (i_sample + 1), gammaM_stop[1]])
                    MU_WHX = np.max([gammaW_start[0] / (i_sample + 1), gammaW_stop[0]])
                    MU_WYH = np.max([gammaW_start[1] / (i_sample + 1), gammaW_stop[1]])

                W_HX, W_YH, M_H, M_Y, D1, D2 = self.update_weights_jit(
                    x_current,
                    h,
                    y,
                    zeta,
                    beta,
                    W_HX,
                    W_YH,
                    M_H,
                    M_Y,
                    D1,
                    D2,
                    MU_MH,
                    MU_MY,
                    MU_WHX,
                    MU_WYH,
                    muD,
                    LayerMinimumGains,
                    LayerMaximumGains,
                    clip_gain_gradients,
                    gain_grads_clipping_multiplier,
                    use_newton_steps_for_gains = use_newton_steps_for_gains,
                )

                Y[:, idx[i_sample]] = y
                H[:, idx[i_sample]] = h

                if debugging:
                    if (i_sample % debug_iteration_point) == 0:
                        try:
                            W = self.compute_overall_mapping_jit(
                                beta, zeta, D1, D2, M_H, M_Y, W_HX, W_YH
                            )
                            self.W = W

                            (
                                SINR_current,
                                SNR_current,
                                SGG,
                                Y_,
                                P,
                            ) = self.evaluate_for_debug(W, A, S, X)

                            self.SV_list.append(abs(SGG))

                            SNR_list.append(SNR_current)
                            SIR_list.append(SINR_current)

                            if plot_in_jupyter:
                                D1list.append(
                                    D1.reshape(
                                        -1,
                                    )
                                )
                                D2list.append(
                                    D2.reshape(
                                        -1,
                                    )
                                )
                                YforPlot = Y[:, idx[i_sample - 25 : i_sample]].T
                                self.plot_for_debug(
                                    SIR_list,
                                    SNR_list,
                                    D1list,
                                    D2list,
                                    P,
                                    debug_iteration_point,
                                    YforPlot,
                                )

                            self.W_HX = W_HX
                            self.W_YH = W_YH
                            self.M_H = M_H
                            self.M_Y = M_Y
                            self.D1 = D1
                            self.D2 = D2

                            self.H = H
                            self.Y = Y
                            self.SIR_list = SIR_list
                            self.SNR_list = SNR_list
                        except Exception as e:
                            print(str(e))
        self.W_HX = W_HX
        self.W_YH = W_YH
        self.M_H = M_H
        self.M_Y = M_Y
        self.D1 = D1
        self.D2 = D2

        self.H = H
        self.Y = Y
        self.SIR_list = SIR_list
        self.SNR_list = SNR_list

    def fit_batch_nnsparse(
        self,
        X,
        n_epochs=5,
        neural_dynamic_iterations=750,
        neural_lr_start=0.2,
        neural_lr_stop=0.05,
        stlambd_lr=0.2,
        synaptic_lr_rule="divide_by_log_index",
        neural_loop_lr_rule="divide_by_slow_loop_index",
        neural_fast_start=False,
        synaptic_lr_decay_divider=5000,
        neural_lr_decay_multiplier=0.005,
        hidden_layer_gain=10,
        clip_gain_gradients=False,
        gain_grads_clipping_multiplier = 1,
        use_newton_steps_for_gains = False,
        shuffle=True,
        debug_iteration_point=1000,
        plot_in_jupyter=False,
    ):

        (
            gammaM_start,
            gammaM_stop,
            gammaW_start,
            gammaW_stop,
            beta,
            zeta,
            muD,
            W_HX,
            W_YH,
            M_H,
            M_Y,
            D1,
            D2,
        ) = (
            self.gammaM_start,
            self.gammaM_stop,
            self.gammaW_start,
            self.gammaW_stop,
            self.beta,
            self.zeta,
            np.array(self.muD),
            self.W_HX,
            self.W_YH,
            self.M_H,
            self.M_Y,
            self.D1,
            self.D2,
        )
        LayerMinimumGains = self.LayerMinimumGains
        LayerMaximumGains = self.LayerMaximumGains
        debugging = self.set_ground_truth

        assert (
            X.shape[0] == self.x_dim
        ), "You must input the transpose, or you need to change one of the following hyperparameters: s_dim, x_dim"
        D1list = []
        D2list = []
        self.SV_list = []
        s_dim = self.s_dim
        h_dim = self.h_dim
        samples = X.shape[1]

        if self.Y is None:
            H = np.zeros((h_dim, samples))
            Y = np.zeros((s_dim, samples))
        else:
            H, Y = self.H, self.Y

        if debugging:
            SIR_list = self.SIR_list
            SNR_list = self.SNR_list
            S = self.S
            A = self.A
            Szeromean = S - S.mean(axis=1).reshape(-1, 1)
            plt.figure(figsize=(70, 50), dpi=80)

        for k in range(n_epochs):
            if shuffle:
                idx = np.random.permutation(samples)
            else:
                idx = np.arange(samples)

            for i_sample in tqdm(range(samples)):

                if ((i_sample + 1) % 100000) == 0:
                    muD = 0.99 * np.array(muD)

                x_current = X[:, idx[i_sample]]  # Take one input

                y = Y[:, idx[i_sample]]

                h = H[:, idx[i_sample]]
                neural_OUTPUT_COMP_TOL = self.neural_OUTPUT_COMP_TOL

                h, y, _ = self.run_neural_dynamics_nnsparse_jit(
                    x_current=x_current,
                    h=h,
                    y=y,
                    M_H=M_H,
                    M_Y=M_Y,
                    W_HX=W_HX,
                    W_YH=W_YH,
                    D1=D1,
                    D2=D2,
                    beta=beta,
                    zeta=zeta,
                    neural_dynamic_iterations=neural_dynamic_iterations,
                    lr_start=neural_lr_start,
                    lr_stop=neural_lr_stop,
                    lr_rule=neural_loop_lr_rule,
                    lr_decay_multiplier=neural_lr_decay_multiplier,
                    stlambd_lr=stlambd_lr,
                    hidden_layer_gain=hidden_layer_gain,
                    neural_fast_start=neural_fast_start,
                    OUTPUT_COMP_TOL=neural_OUTPUT_COMP_TOL,
                )

                if synaptic_lr_rule == "constant":
                    MU_MH = gammaM_start[0]
                    MU_MY = gammaM_start[1]
                    MU_WHX = gammaW_start[0]
                    MU_WYH = gammaW_start[1]
                elif synaptic_lr_rule == "divide_by_log_index":
                    # MUS = np.max([gamma_start/(1 + np.log(2 + (i_sample))), gamma_stop])
                    MU_MH = np.max(
                        [
                            gammaM_start[0]
                            / (1 + np.log(2 + (i_sample // synaptic_lr_decay_divider))),
                            gammaM_stop[0],
                        ]
                    )
                    MU_MY = np.max(
                        [
                            gammaM_start[1]
                            / (1 + np.log(2 + (i_sample // synaptic_lr_decay_divider))),
                            gammaM_stop[1],
                        ]
                    )
                    MU_WHX = np.max(
                        [
                            gammaW_start[0]
                            / (1 + np.log(2 + (i_sample // synaptic_lr_decay_divider))),
                            gammaW_stop[0],
                        ]
                    )
                    MU_WYH = np.max(
                        [
                            gammaW_start[1]
                            / (1 + np.log(2 + (i_sample // synaptic_lr_decay_divider))),
                            gammaW_stop[1],
                        ]
                    )
                elif synaptic_lr_rule == "divide_by_index":
                    MU_MH = np.max([gammaM_start[0] / (i_sample + 1), gammaM_stop[0]])
                    MU_MY = np.max([gammaM_start[1] / (i_sample + 1), gammaM_stop[1]])
                    MU_WHX = np.max([gammaW_start[0] / (i_sample + 1), gammaW_stop[0]])
                    MU_WYH = np.max([gammaW_start[1] / (i_sample + 1), gammaW_stop[1]])

                W_HX, W_YH, M_H, M_Y, D1, D2 = self.update_weights_jit(
                    x_current,
                    h,
                    y,
                    zeta,
                    beta,
                    W_HX,
                    W_YH,
                    M_H,
                    M_Y,
                    D1,
                    D2,
                    MU_MH,
                    MU_MY,
                    MU_WHX,
                    MU_WYH,
                    muD,
                    LayerMinimumGains,
                    LayerMaximumGains,
                    clip_gain_gradients,
                    gain_grads_clipping_multiplier,
                    use_newton_steps_for_gains = use_newton_steps_for_gains,
                )

                Y[:, idx[i_sample]] = y
                H[:, idx[i_sample]] = h

                if debugging:
                    if (i_sample % debug_iteration_point) == 0:
                        try:
                            W = self.compute_overall_mapping_jit(
                                beta, zeta, D1, D2, M_H, M_Y, W_HX, W_YH
                            )
                            self.W = W

                            (
                                SINR_current,
                                SNR_current,
                                SGG,
                                Y_,
                                P,
                            ) = self.evaluate_for_debug(
                                W, A, S, X, mean_normalize_estimation=False
                            )

                            self.SV_list.append(abs(SGG))

                            SNR_list.append(SNR_current)
                            SIR_list.append(SINR_current)

                            if plot_in_jupyter:
                                D1list.append(
                                    D1.reshape(
                                        -1,
                                    )
                                )
                                D2list.append(
                                    D2.reshape(
                                        -1,
                                    )
                                )
                                YforPlot = Y[:, idx[i_sample - 25 : i_sample]].T
                                self.plot_for_debug(
                                    SIR_list,
                                    SNR_list,
                                    D1list,
                                    D2list,
                                    P,
                                    debug_iteration_point,
                                    YforPlot,
                                )

                            self.W_HX = W_HX
                            self.W_YH = W_YH
                            self.M_H = M_H
                            self.M_Y = M_Y
                            self.D1 = D1
                            self.D2 = D2

                            self.H = H
                            self.Y = Y
                            self.SIR_list = SIR_list
                            self.SNR_list = SNR_list
                        except Exception as e:
                            print(str(e))
        self.W_HX = W_HX
        self.W_YH = W_YH
        self.M_H = M_H
        self.M_Y = M_Y
        self.D1 = D1
        self.D2 = D2

        self.H = H
        self.Y = Y
        self.SIR_list = SIR_list
        self.SNR_list = SNR_list

    def fit_batch_simplex(
        self,
        X,
        n_epochs=5,
        neural_dynamic_iterations=750,
        neural_lr_start=0.2,
        neural_lr_stop=0.05,
        stlambd_lr=0.05,
        use_previous_stlambd=False,
        synaptic_lr_rule="divide_by_log_index",
        neural_loop_lr_rule="divide_by_slow_loop_index",
        neural_fast_start = False,
        synaptic_lr_decay_divider=5000,
        neural_lr_decay_multiplier=0.005,
        hidden_layer_gain=25,
        clip_gain_gradients=False,
        gain_grads_clipping_multiplier = 1,
        use_newton_steps_for_gains = False,
        shuffle=True,
        debug_iteration_point=1000,
        plot_in_jupyter=False,
    ):
        """_summary_

        Args:
            X (_type_): _description_
            n_epochs (int, optional): _description_. Defaults to 5.
            neural_dynamic_iterations (int, optional): _description_. Defaults to 750.
            neural_lr_start (float, optional): _description_. Defaults to 0.2.
            neural_lr_stop (float, optional): _description_. Defaults to 0.05.
            shuffle (bool, optional): _description_. Defaults to True.
            debug_iteration_point (int, optional): _description_. Defaults to 1000.
            plot_in_jupyter (bool, optional): _description_. Defaults to False.
        """
        (
            gammaM_start,
            gammaM_stop,
            gammaW_start,
            gammaW_stop,
            beta,
            zeta,
            muD,
            W_HX,
            W_YH,
            M_H,
            M_Y,
            D1,
            D2,
        ) = (
            self.gammaM_start,
            self.gammaM_stop,
            self.gammaW_start,
            self.gammaW_stop,
            self.beta,
            self.zeta,
            np.array(self.muD),
            self.W_HX,
            self.W_YH,
            self.M_H,
            self.M_Y,
            self.D1,
            self.D2,
        )
        LayerMinimumGains = self.LayerMinimumGains
        LayerMaximumGains = self.LayerMaximumGains
        STLAMBD=None
        debugging = self.set_ground_truth

        assert (
            X.shape[0] == self.x_dim
        ), "You must input the transpose, or you need to change one of the following hyperparameters: s_dim, x_dim"
        D1list = []
        D2list = []
        self.SV_list = []
        s_dim = self.s_dim
        h_dim = self.h_dim
        samples = X.shape[1]

        if self.Y is None:
            H = np.zeros((h_dim, samples))
            Y = np.zeros((s_dim, samples))
        else:
            H, Y = self.H, self.Y

        if debugging:
            SIR_list = self.SIR_list
            SNR_list = self.SNR_list
            S = self.S
            A = self.A
            Szeromean = S - S.mean(axis=1).reshape(-1, 1)
            plt.figure(figsize=(70, 50), dpi=80)

        for k in range(n_epochs):
            if shuffle:
                idx = np.random.permutation(samples)
            else:
                idx = np.arange(samples)

            for i_sample in tqdm(range(samples)):

                if ((i_sample + 1) % 100000) == 0:
                    muD = 0.99 * np.array(muD)

                x_current = X[:, idx[i_sample]]  # Take one input

                y = Y[:, idx[i_sample]]

                h = H[:, idx[i_sample]]
                neural_OUTPUT_COMP_TOL = self.neural_OUTPUT_COMP_TOL

                h, y, STLAMBD_, _ = self.run_neural_dynamics_simplex_jit(
                                                                        x_current=x_current,
                                                                        h=h,
                                                                        y=y,
                                                                        M_H=M_H,
                                                                        M_Y=M_Y,
                                                                        W_HX=W_HX,
                                                                        W_YH=W_YH,
                                                                        D1=D1,
                                                                        D2=D2,
                                                                        beta=beta,
                                                                        zeta=zeta,
                                                                        neural_dynamic_iterations=neural_dynamic_iterations,
                                                                        lr_start=neural_lr_start,
                                                                        lr_stop=neural_lr_stop,
                                                                        lr_rule=neural_loop_lr_rule,
                                                                        lr_decay_multiplier=neural_lr_decay_multiplier,
                                                                        STLAMBD=STLAMBD,
                                                                        stlambd_lr=stlambd_lr,
                                                                        hidden_layer_gain=hidden_layer_gain,
                                                                        neural_fast_start=neural_fast_start,
                                                                        OUTPUT_COMP_TOL=neural_OUTPUT_COMP_TOL,
                                                                    )
                if use_previous_stlambd:
                    STLAMBD = STLAMBD_
                if synaptic_lr_rule == "constant":
                    MU_MH = gammaM_start[0]
                    MU_MY = gammaM_start[1]
                    MU_WHX = gammaW_start[0]
                    MU_WYH = gammaW_start[1]
                elif synaptic_lr_rule == "divide_by_log_index":
                    # MUS = np.max([gamma_start/(1 + np.log(2 + (i_sample))), gamma_stop])
                    MU_MH = np.max(
                        [
                            gammaM_start[0]
                            / (1 + np.log(2 + (i_sample // synaptic_lr_decay_divider))),
                            gammaM_stop[0],
                        ]
                    )
                    MU_MY = np.max(
                        [
                            gammaM_start[1]
                            / (1 + np.log(2 + (i_sample // synaptic_lr_decay_divider))),
                            gammaM_stop[1],
                        ]
                    )
                    MU_WHX = np.max(
                        [
                            gammaW_start[0]
                            / (1 + np.log(2 + (i_sample // synaptic_lr_decay_divider))),
                            gammaW_stop[0],
                        ]
                    )
                    MU_WYH = np.max(
                        [
                            gammaW_start[1]
                            / (1 + np.log(2 + (i_sample // synaptic_lr_decay_divider))),
                            gammaW_stop[1],
                        ]
                    )
                elif synaptic_lr_rule == "divide_by_index":
                    MU_MH = np.max([gammaM_start[0] / (i_sample + 1), gammaM_stop[0]])
                    MU_MY = np.max([gammaM_start[1] / (i_sample + 1), gammaM_stop[1]])
                    MU_WHX = np.max([gammaW_start[0] / (i_sample + 1), gammaW_stop[0]])
                    MU_WYH = np.max([gammaW_start[1] / (i_sample + 1), gammaW_stop[1]])

                W_HX, W_YH, M_H, M_Y, D1, D2 = self.update_weights_jit(
                    x_current,
                    h,
                    y,
                    zeta,
                    beta,
                    W_HX,
                    W_YH,
                    M_H,
                    M_Y,
                    D1,
                    D2,
                    MU_MH,
                    MU_MY,
                    MU_WHX,
                    MU_WYH,
                    muD,
                    LayerMinimumGains,
                    LayerMaximumGains,
                    clip_gain_gradients,
                    gain_grads_clipping_multiplier,
                    use_newton_steps_for_gains = use_newton_steps_for_gains,
                )

                Y[:, idx[i_sample]] = y
                H[:, idx[i_sample]] = h

                if debugging:
                    if (i_sample % debug_iteration_point) == 0:
                        try:
                            W = self.compute_overall_mapping_jit(
                                beta, zeta, D1, D2, M_H, M_Y, W_HX, W_YH
                            )
                            self.W = W

                            (
                                SINR_current,
                                SNR_current,
                                SGG,
                                Y_,
                                P,
                            ) = self.evaluate_for_debug(
                                W, A, Szeromean, X, mean_normalize_estimation=True
                            )

                            self.SV_list.append(abs(SGG))

                            SNR_list.append(SNR_current)
                            SIR_list.append(SINR_current)

                            if plot_in_jupyter:
                                D1list.append(
                                    D1.reshape(
                                        -1,
                                    )
                                )
                                D2list.append(
                                    D2.reshape(
                                        -1,
                                    )
                                )
                                YforPlot = Y[:, idx[i_sample - 25 : i_sample]].T
                                self.plot_for_debug(
                                    SIR_list,
                                    SNR_list,
                                    D1list,
                                    D2list,
                                    P,
                                    debug_iteration_point,
                                    YforPlot,
                                )

                            self.W_HX = W_HX
                            self.W_YH = W_YH
                            self.M_H = M_H
                            self.M_Y = M_Y
                            self.D1 = D1
                            self.D2 = D2

                            self.H = H
                            self.Y = Y
                            self.SIR_list = SIR_list
                            self.SNR_list = SNR_list
                        except Exception as e:
                            print(str(e))
        self.W_HX = W_HX
        self.W_YH = W_YH
        self.M_H = M_H
        self.M_Y = M_Y
        self.D1 = D1
        self.D2 = D2

        self.H = H
        self.Y = Y
        self.SIR_list = SIR_list
        self.SNR_list = SNR_list

    def fit_batch_general_polytope(
        self,
        X,
        signed_dims,
        nn_dims,
        sparse_dims_list,
        n_epochs=5,
        neural_dynamic_iterations=750,
        neural_lr_start=0.2,
        neural_lr_stop=0.05,
        stlambd_lr=1,
        synaptic_lr_rule="divide_by_log_index",
        neural_loop_lr_rule="divide_by_slow_loop_index",
        synaptic_lr_decay_divider=5000,
        neural_lr_decay_multiplier=0.005,
        hidden_layer_gain=10,
        clip_gain_gradients=False,
        gain_grads_clipping_multiplier = 1,
        use_newton_steps_for_gains = False,
        shuffle=True,
        debug_iteration_point=1000,
        plot_in_jupyter=False,
    ):

        (
            gammaM_start,
            gammaM_stop,
            gammaW_start,
            gammaW_stop,
            beta,
            zeta,
            muD,
            W_HX,
            W_YH,
            M_H,
            M_Y,
            D1,
            D2,
        ) = (
            self.gammaM_start,
            self.gammaM_stop,
            self.gammaW_start,
            self.gammaW_stop,
            self.beta,
            self.zeta,
            np.array(self.muD),
            self.W_HX,
            self.W_YH,
            self.M_H,
            self.M_Y,
            self.D1,
            self.D2,
        )
        LayerMinimumGains = self.LayerMinimumGains
        LayerMaximumGains = self.LayerMaximumGains
        debugging = self.set_ground_truth

        assert (
            X.shape[0] == self.x_dim
        ), "You must input the transpose, or you need to change one of the following hyperparameters: s_dim, x_dim"
        D1list = []
        D2list = []
        self.SV_list = []
        s_dim = self.s_dim
        h_dim = self.h_dim
        samples = X.shape[1]

        if self.Y is None:
            H = np.zeros((h_dim, samples))
            Y = np.zeros((s_dim, samples))
        else:
            H, Y = self.H, self.Y

        if debugging:
            SIR_list = self.SIR_list
            SNR_list = self.SNR_list
            S = self.S
            A = self.A
            Szeromean = S - S.mean(axis=1).reshape(-1, 1)
            plt.figure(figsize=(70, 50), dpi=80)

        if signed_dims.size == 0:
            signed_dims = np.array([-1])
        if nn_dims.size == 0:
            nn_dims = np.array([-1])
        if not sparse_dims_list:
            sparse_dims_list = [np.array([-1])]

        for k in range(n_epochs):
            if shuffle:
                idx = np.random.permutation(samples)
            else:
                idx = np.arange(samples)

            for i_sample in tqdm(range(samples)):

                if ((i_sample + 1) % 100000) == 0:
                    muD = 0.99 * np.array(muD)

                x_current = X[:, idx[i_sample]]  # Take one input

                y = Y[:, idx[i_sample]]

                h = H[:, idx[i_sample]]
                neural_OUTPUT_COMP_TOL = self.neural_OUTPUT_COMP_TOL

                h, y, _ = self.run_neural_dynamics_general_polytope_jit(
                    x_current=x_current,
                    h=h,
                    y=y,
                    signed_dims=signed_dims,
                    nn_dims=nn_dims,
                    sparse_dims_list=sparse_dims_list,
                    M_H=M_H,
                    M_Y=M_Y,
                    W_HX=W_HX,
                    W_YH=W_YH,
                    D1=D1,
                    D2=D2,
                    beta=beta,
                    zeta=zeta,
                    neural_dynamic_iterations=neural_dynamic_iterations,
                    lr_start=neural_lr_start,
                    lr_stop=neural_lr_stop,
                    lr_rule=neural_loop_lr_rule,
                    lr_decay_multiplier=neural_lr_decay_multiplier,
                    stlambd_lr=stlambd_lr,
                    hidden_layer_gain=hidden_layer_gain,
                    OUTPUT_COMP_TOL=neural_OUTPUT_COMP_TOL,
                )

                if synaptic_lr_rule == "constant":
                    MU_MH = gammaM_start[0]
                    MU_MY = gammaM_start[1]
                    MU_WHX = gammaW_start[0]
                    MU_WYH = gammaW_start[1]
                elif synaptic_lr_rule == "divide_by_log_index":
                    # MUS = np.max([gamma_start/(1 + np.log(2 + (i_sample))), gamma_stop])
                    MU_MH = np.max(
                        [
                            gammaM_start[0]
                            / (1 + np.log(2 + (i_sample // synaptic_lr_decay_divider))),
                            gammaM_stop[0],
                        ]
                    )
                    MU_MY = np.max(
                        [
                            gammaM_start[1]
                            / (1 + np.log(2 + (i_sample // synaptic_lr_decay_divider))),
                            gammaM_stop[1],
                        ]
                    )
                    MU_WHX = np.max(
                        [
                            gammaW_start[0]
                            / (1 + np.log(2 + (i_sample // synaptic_lr_decay_divider))),
                            gammaW_stop[0],
                        ]
                    )
                    MU_WYH = np.max(
                        [
                            gammaW_start[1]
                            / (1 + np.log(2 + (i_sample // synaptic_lr_decay_divider))),
                            gammaW_stop[1],
                        ]
                    )
                elif synaptic_lr_rule == "divide_by_index":
                    MU_MH = np.max([gammaM_start[0] / (i_sample + 1), gammaM_stop[0]])
                    MU_MY = np.max([gammaM_start[1] / (i_sample + 1), gammaM_stop[1]])
                    MU_WHX = np.max([gammaW_start[0] / (i_sample + 1), gammaW_stop[0]])
                    MU_WYH = np.max([gammaW_start[1] / (i_sample + 1), gammaW_stop[1]])

                W_HX, W_YH, M_H, M_Y, D1, D2 = self.update_weights_jit(
                    x_current,
                    h,
                    y,
                    zeta,
                    beta,
                    W_HX,
                    W_YH,
                    M_H,
                    M_Y,
                    D1,
                    D2,
                    MU_MH,
                    MU_MY,
                    MU_WHX,
                    MU_WYH,
                    muD,
                    LayerMinimumGains,
                    LayerMaximumGains,
                    clip_gain_gradients,
                    gain_grads_clipping_multiplier,
                    use_newton_steps_for_gains = use_newton_steps_for_gains,
                )

                Y[:, idx[i_sample]] = y
                H[:, idx[i_sample]] = h

                if debugging:
                    if (i_sample % debug_iteration_point) == 0:
                        try:
                            W = self.compute_overall_mapping_jit(
                                beta, zeta, D1, D2, M_H, M_Y, W_HX, W_YH
                            )
                            self.W = W

                            (
                                SINR_current,
                                SNR_current,
                                SGG,
                                Y_,
                                P,
                            ) = self.evaluate_for_debug(
                                W, A, S, X, mean_normalize_estimation=False
                            )

                            self.SV_list.append(abs(SGG))

                            SNR_list.append(SNR_current)
                            SIR_list.append(SINR_current)

                            if plot_in_jupyter:
                                D1list.append(
                                    D1.reshape(
                                        -1,
                                    )
                                )
                                D2list.append(
                                    D2.reshape(
                                        -1,
                                    )
                                )
                                YforPlot = Y[:, idx[i_sample - 25 : i_sample]].T
                                self.plot_for_debug(
                                    SIR_list,
                                    SNR_list,
                                    D1list,
                                    D2list,
                                    P,
                                    debug_iteration_point,
                                    YforPlot,
                                )

                            self.W_HX = W_HX
                            self.W_YH = W_YH
                            self.M_H = M_H
                            self.M_Y = M_Y
                            self.D1 = D1
                            self.D2 = D2

                            self.H = H
                            self.Y = Y
                            self.SIR_list = SIR_list
                            self.SNR_list = SNR_list
                        except Exception as e:
                            print(str(e))
        self.W_HX = W_HX
        self.W_YH = W_YH
        self.M_H = M_H
        self.M_Y = M_Y
        self.D1 = D1
        self.D2 = D2

        self.H = H
        self.Y = Y
        self.SIR_list = SIR_list
        self.SNR_list = SNR_list

class OnlineWSMOlshaussen(OnlineWSMBSS):

    def ZeroOneNormalizeData(self, data):
        return (data - np.min(data)) / (np.max(data) - np.min(data))

    def plot_receptive_fields(self, Wf):
        pl.clf()
        fig, ax = pl.subplots(12,12, figsize = (20,20))
        for l in range(144):
            rf = np.reshape(Wf[l,:], (12,12))
            rf = self.ZeroOneNormalizeData(rf)
            ax[l//12, l%12].imshow(rf, cmap = 'gray')
            ax[l//12, l%12].axes.xaxis.set_visible(False)
            ax[l//12, l%12].axes.yaxis.set_visible(False)
        pl.subplots_adjust( right=0.97,\
                            left=0.03,\
                            bottom=0.03,\
                            top=0.97,\
                            wspace=0.1,\
                            hspace=0.1)
        clear_output(wait=True)
        display(pl.gcf())

    @staticmethod
    @njit
    def run_neural_dynamics_olhaussen_jit(
        x_current, 
        h, 
        y, 
        M_H, 
        M_Y, 
        W_HX, 
        W_YH, 
        D1, 
        D2, 
        beta, 
        zeta, 
        neural_dynamic_iterations, 
        lr_start,
        lr_stop,
        lr_rule,
        lr_decay_multiplier=0.005,
        stlambd_lr=2e-2,
        hidden_layer_gain=100,
        OUTPUT_COMP_TOL = 1e-7,
    ):
        def offdiag(A, return_diag=False):
            if return_diag:
                diag = np.diag(A)
                return A - np.diag(diag), diag
            else:
                return A - np.diag(diag)

        def sthreshold(x, thresh = 0):
            absolute = np.abs(x)
            sign = np.sign(x)
            return (absolute>thresh) * (absolute - thresh) * sign

        M_hat_H, Gamma_H = offdiag(M_H, True)
        M_hat_Y, Gamma_Y = offdiag(M_Y, True)

        mat_factor1 = (1 - zeta) * beta * (D1 * W_HX)
        mat_factor2 = (1 - zeta) * (1 - beta) * M_hat_H + (1 - zeta) * beta * (
            (D1 * M_hat_H) * D1.T
        )
        mat_factor3 = (1 - zeta) * (1 - beta) * (W_YH.T * D2.T)
        mat_factor4 = (1 - zeta) * Gamma_H * ((1 - beta) + beta * (D1.T) ** 2)
        mat_factor5 = zeta * (1 - beta) * D2 * W_YH
        mat_factor6 = (zeta * (1 - beta) * ((D2 * M_hat_Y) * D2.T))
        mat_factor7 = ( zeta * Gamma_Y * ((1 - beta) * (D2.T) ** 2))

        v = mat_factor4[0] * h
        u = (Gamma_Y * D2.T)[0] * y
        
        PreviousMembraneVoltages = {'v': np.zeros_like(v), 'u': np.zeros_like(u)}
        MembraneVoltageNotSettled = 1
        OutputCounter = 0 
        STLAMBD = 0
        while MembraneVoltageNotSettled & (OutputCounter < neural_dynamic_iterations):
            OutputCounter += 1
            if lr_rule == "constant":
                MUV = lr_start
            elif lr_rule == "divide_by_loop_index":
                MUV = max(lr_start / (1 + OutputCounter), lr_stop)
            elif lr_rule == "divide_by_slow_loop_index":
                MUV = max(lr_start / (1 + OutputCounter * lr_decay_multiplier), lr_stop)
            elif lr_rule == "divide_by_sqrt_loop_index":
                MUV = max(lr_start / np.sqrt(OutputCounter), lr_stop)

            STLAMBD = 0
            delv = -v + mat_factor1 @ x_current - mat_factor2 @ h + mat_factor3 @ y
            v = v + MUV * delv 
            h = np.clip(v / mat_factor4[0], -hidden_layer_gain, hidden_layer_gain)

            delu = -u + mat_factor5 @ h
            delu = delu - mat_factor6 @ y
            u = u + MUV * delu 
            a = u / mat_factor7[0]

            y = sthreshold(a,0)

            temp = 1
            if np.linalg.norm(a,1) >= 1:
                iter2 = 0

                while ((np.abs(STLAMBD - temp) / np.abs(STLAMBD + 1e-10)) > 1e-5) & (iter2 < 10):

                    iter2 += 1
                    temp = STLAMBD

                    y = sthreshold(a, STLAMBD)

                    sstep = stlambd_lr / np.sqrt(iter2)
                    dval = np.linalg.norm(y,1) - 1
                    STLAMBD = STLAMBD + sstep * dval
                    if STLAMBD < 0:
                        STLAMBD = 0
                        y = a
                y = np.clip(y, -1, 1)
            MembraneVoltageNotSettled = 0
            if (np.linalg.norm(v - PreviousMembraneVoltages['v'])/np.linalg.norm(v) > OUTPUT_COMP_TOL) | (np.linalg.norm(u - PreviousMembraneVoltages['u'])/np.linalg.norm(u) > OUTPUT_COMP_TOL):
                MembraneVoltageNotSettled = 1
            PreviousMembraneVoltages['v'] = v
            PreviousMembraneVoltages['u'] = u  
        return h,y, OutputCounter

    def fit_batch(
        self, 
        X, 
        n_epochs = 5, 
        neural_dynamic_iterations = 250, 
        neural_lr_start = 5, 
        neural_lr_stop = 1e-6,
        stlambd_lr = 2e-2,
        synaptic_lr_rule="constant",
        neural_loop_lr_rule="divide_by_sqrt_loop_index",
        synaptic_lr_decay_divider=5000,
        neural_lr_decay_multiplier=0.005,
        hidden_layer_gain=100,
        clip_gain_gradients=False,
        gain_grads_clipping_multiplier = 1,
        use_newton_steps_for_gains = False,
        shuffle = True, 
        debug_iteration_point = 1000, 
        plot_rf = False, 
        default_start = True):

        (
            gammaM_start,
            gammaM_stop,
            gammaW_start,
            gammaW_stop,
            beta,
            zeta,
            muD,
            W_HX,
            W_YH,
            M_H,
            M_Y,
            D1,
            D2,
        ) = (
            self.gammaM_start,
            self.gammaM_stop,
            self.gammaW_start,
            self.gammaW_stop,
            self.beta,
            self.zeta,
            np.array(self.muD),
            self.W_HX,
            self.W_YH,
            self.M_H,
            self.M_Y,
            self.D1,
            self.D2,
        )
        
        LayerMinimumGains = self.LayerMinimumGains
        LayerMaximumGains = self.LayerMaximumGains
        neural_OUTPUT_COMP_TOL = self.neural_OUTPUT_COMP_TOL

        if default_start:
            W_HX = np.eye(self.h_dim,self.x_dim) + 0.01 * np.random.standard_normal(size = (self.h_dim, self.x_dim))
            W_YH = np.eye(self.s_dim, self.h_dim) + 0.01 * np.random.standard_normal(size = (self.s_dim, self.h_dim))

            for k in range(W_HX.shape[0]):
                W_HX[k,:] = self.WScalings[0] * W_HX[k,:]/np.linalg.norm(W_HX[k,:])
            for k in range(W_YH.shape[0]):
                W_YH[k,:] = self.WScalings[1] * W_YH[k,:]/np.linalg.norm(W_YH[k,:])


        self.W_HX = W_HX
        self.W_YH = W_YH       
        
        assert X.shape[0] == self.x_dim, "You must input the transpose, or you need to change one of the following hyperparameters: s_dim, x_dim"

        s_dim = self.s_dim
        h_dim = self.h_dim
        samples = X.shape[1]
        x_dim = self.x_dim

        if self.Y is None:
            H = np.zeros((h_dim,samples))
            Y = np.zeros((s_dim,samples))
        else:
            H, Y = self.H, self.Y

        for k in range(n_epochs):
            if shuffle:
                idx = np.random.permutation(samples)
            else:
                idx = np.arange(samples)
                
            for i_sample in tqdm(range(samples)):

                x_current  = X[:,idx[i_sample]] # Take one input

                y = Y[:,idx[i_sample]]

                h = H[:,idx[i_sample]]

                h,y,_ = self.run_neural_dynamics_olhaussen_jit(
                    x_current = x_current, 
                    h = h, 
                    y = y, 
                    M_H = M_H,
                    M_Y = M_Y,
                    W_HX = W_HX, 
                    W_YH = W_YH, 
                    D1 = D1, 
                    D2 = D2, 
                    beta = beta, 
                    zeta = zeta, 
                    neural_dynamic_iterations = neural_dynamic_iterations, 
                    lr_start = neural_lr_start,
                    lr_stop = neural_lr_stop,
                    lr_rule=neural_loop_lr_rule,
                    lr_decay_multiplier=neural_lr_decay_multiplier,
                    stlambd_lr=stlambd_lr,
                    hidden_layer_gain=hidden_layer_gain,
                    OUTPUT_COMP_TOL = neural_OUTPUT_COMP_TOL
                )

                if synaptic_lr_rule == "constant":
                    MU_MH = gammaM_start[0]
                    MU_MY = gammaM_start[1]
                    MU_WHX = gammaW_start[0]
                    MU_WYH = gammaW_start[1]
                elif synaptic_lr_rule == "divide_by_log_index":
                    MU_MH = np.max(
                        [
                            gammaM_start[0]
                            / (1 + np.log(2 + (i_sample // synaptic_lr_decay_divider))),
                            gammaM_stop[0],
                        ]
                    )
                    MU_MY = np.max(
                        [
                            gammaM_start[1]
                            / (1 + np.log(2 + (i_sample // synaptic_lr_decay_divider))),
                            gammaM_stop[1],
                        ]
                    )
                    MU_WHX = np.max(
                        [
                            gammaW_start[0]
                            / (1 + np.log(2 + (i_sample // synaptic_lr_decay_divider))),
                            gammaW_stop[0],
                        ]
                    )
                    MU_WYH = np.max(
                        [
                            gammaW_start[1]
                            / (1 + np.log(2 + (i_sample // synaptic_lr_decay_divider))),
                            gammaW_stop[1],
                        ]
                    )
                elif synaptic_lr_rule == "divide_by_index":
                    MU_MH = np.max(
                        [
                            gammaM_start[0]
                            / (i_sample // synaptic_lr_decay_divider + 1),
                            gammaM_stop[0],
                        ]
                    )
                    MU_MY = np.max(
                        [
                            gammaM_start[1]
                            / (i_sample // synaptic_lr_decay_divider + 1),
                            gammaM_stop[1],
                        ]
                    )
                    MU_WHX = np.max(
                        [
                            gammaW_start[0]
                            / (i_sample // synaptic_lr_decay_divider + 1),
                            gammaW_stop[0],
                        ]
                    )
                    MU_WYH = np.max(
                        [
                            gammaW_start[1]
                            / (i_sample // synaptic_lr_decay_divider + 1),
                            gammaW_stop[1],
                        ]
                    )

                W_HX, W_YH, M_H, M_Y, D1, D2 = self.update_weights_jit(
                    x_current,
                    h,
                    y,
                    zeta,
                    beta,
                    W_HX,
                    W_YH,
                    M_H,
                    M_Y,
                    D1,
                    D2,
                    MU_MH,
                    MU_MY,
                    MU_WHX,
                    MU_WYH,
                    muD,
                    LayerMinimumGains,
                    LayerMaximumGains,
                    clip_gain_gradients,
                    gain_grads_clipping_multiplier,
                    use_newton_steps_for_gains = use_newton_steps_for_gains,
                )

                Y[:,idx[i_sample]] = y
                H[:,idx[i_sample]] = h

                if (i_sample % debug_iteration_point) == 0:        
                    try:   
                        W = self.compute_overall_mapping_jit(
                                beta, zeta, D1, D2, M_H, M_Y, W_HX, W_YH
                            )
                        self.W = W

                        if plot_rf:
                            n_iterations = k*samples + i_sample
                            print('The receptive fields after {}'.format(n_iterations))
                            self.plot_receptive_fields(W)

                        self.W_HX = W_HX
                        self.W_YH = W_YH
                        self.M_H = M_H
                        self.M_Y = M_Y
                        self.D1 = D1
                        self.D2 = D2

                        self.H = H
                        self.Y = Y

                    except Exception as e:
                        print(e)

        self.W_HX = W_HX
        self.W_YH = W_YH
        self.M_H = M_H
        self.M_Y = M_Y
        self.D1 = D1
        self.D2 = D2

        self.H = H
        self.Y = Y

class OnlineWSMPMF(OnlineWSMBSS):
    """
    This class is only written for the special polytope presented in the paper. Check the Appendices D.6 and E.7.1
    """
    @staticmethod
    @njit
    def run_neural_dynamics(
        x_current,
        h,
        y,
        M_H,
        M_Y,
        W_HX,
        W_YH,
        D1,
        D2,
        beta,
        zeta,
        neural_dynamic_iterations,
        lr_start,
        lr_stop,
        lr_rule,
        lr_decay_multiplier=0.005,
        stlambd_lr=1.5,
        hidden_layer_gain=2,
        neural_fast_start=False,
        OUTPUT_COMP_TOL=1e-7,
    ):
        def offdiag(A, return_diag=False):
            if return_diag:
                diag = np.diag(A)
                return A - np.diag(diag), diag
            else:
                return A - np.diag(diag)

        if neural_fast_start:
            # Mapping from xt -> ht
            A = (1 - zeta) * (
                beta * ((D1 * M_H) * D1.T)
                + (1 - beta) * (M_H - W_YH.T @ np.linalg.solve(M_Y, W_YH))
            )
            b = (1 - zeta) * beta * (D1 * W_HX)
            WL1 = np.linalg.solve(A, b)
            # Mapping from ht -> yt
            WL2 = np.linalg.solve(M_Y * D2.T, W_YH)
            h = WL1 @ x_current
            y = WL2 @ h

        M_hat_H, Gamma_H = offdiag(M_H, True)
        M_hat_Y, Gamma_Y = offdiag(M_Y, True)

        mat_factor1 = (1 - zeta) * beta * (D1 * W_HX)
        mat_factor2 = (1 - zeta) * (1 - beta) * M_hat_H + (1 - zeta) * beta * (
            (D1 * M_hat_H) * D1.T
        )
        mat_factor3 = (1 - zeta) * (1 - beta) * (W_YH.T * D2.T)
        mat_factor4 = (1 - zeta) * Gamma_H * ((1 - beta) + beta * (D1.T) ** 2)
        mat_factor5 = M_hat_Y * D2.T
        mat_factor6 = Gamma_Y * D2.T

        v = mat_factor4[0] * h
        u = mat_factor6[0] * y

        PreviousMembraneVoltages = {'v': np.zeros_like(v), 'u': np.zeros_like(u)}
        MembraneVoltageNotSettled = 1
        OutputCounter = 0
        STLAMBD1 = 0
        STLAMBD2 = 0

        while MembraneVoltageNotSettled & (OutputCounter < neural_dynamic_iterations):
            OutputCounter += 1
            if lr_rule == "constant":
                MUV = lr_start
            elif lr_rule == "divide_by_loop_index":
                MUV = max(lr_start / (1 + OutputCounter), lr_stop)
            elif lr_rule == "divide_by_slow_loop_index":
                MUV = max(lr_start / (1 + OutputCounter * lr_decay_multiplier), lr_stop)

            delv = -v + mat_factor1 @ x_current - mat_factor2 @ h + mat_factor3 @ y
            v = v + MUV * delv
            h = v / mat_factor4[0]
            h = np.clip(h, -hidden_layer_gain, hidden_layer_gain)
            delu = -u + W_YH @ h - mat_factor5 @ y
            u = u + MUV * delu
            y = u / mat_factor6[0]

            y_sparse_absolute1 = np.abs(y[np.array([0,1])])
            y_sparse_absolute2 = np.abs(y[np.array([1,2])])
            y_sparse_sign1 = np.sign(y[np.array([0,1])])
            y_sparse_sign2 = np.sign(y[np.array([1,2])])
            
            y[0] = (y_sparse_absolute1[0] > STLAMBD1) * (y_sparse_absolute1[0] - STLAMBD1) * y_sparse_sign1[0]
            y[1] = (y_sparse_absolute1[1] > (STLAMBD1 + STLAMBD2)) * (y_sparse_absolute1[1] - (STLAMBD1 + STLAMBD2)) * y_sparse_sign1[1]
            y[2] = (y_sparse_absolute2[1] > STLAMBD2) * (y_sparse_absolute2[1] - STLAMBD2) * y_sparse_sign2[1]
            
            y = y*(y>=-1.0)*(y<=1.0)+(y>1.0)*1.0-1.0*(y<-1.0)
            y[2] = y[2]*(y[2]>=0)*(y[2]<=1) + 1.0*(y[2]>1)
            
            dval1 = np.linalg.norm(y[np.array([0,1])],1) - 1
            dval2 = np.linalg.norm(y[np.array([1,2])],1) - 1
            
            STLAMBD1 = max(STLAMBD1 + stlambd_lr * dval1,0)
            STLAMBD2 = max(STLAMBD2 + stlambd_lr * dval2,0)

            MembraneVoltageNotSettled = 0
            if (
                np.linalg.norm(v - PreviousMembraneVoltages["v"]) / np.linalg.norm(v)
                > OUTPUT_COMP_TOL
            ) | (
                np.linalg.norm(u - PreviousMembraneVoltages["u"]) / np.linalg.norm(u)
                > OUTPUT_COMP_TOL
            ):
                MembraneVoltageNotSettled = 1
            PreviousMembraneVoltages["v"] = v
            PreviousMembraneVoltages["u"] = u

        return h, y, OutputCounter

    def fit_batch_pmf(
        self,
        X,
        n_epochs=1,
        neural_dynamic_iterations=750,
        neural_lr_start=0.2,
        neural_lr_stop=0.5,
        stlambd_lr=1.5,
        synaptic_lr_rule="divide_by_log_index",
        neural_loop_lr_rule="divide_by_slow_loop_index",
        synaptic_lr_decay_divider=5000,
        neural_lr_decay_multiplier=0.005,
        neural_fast_start=False,
        hidden_layer_gain=2,
        clip_gain_gradients=False,
        gain_grads_clipping_multiplier = 1,
        use_newton_steps_for_gains = False,
        shuffle=True,
        debug_iteration_point=1000,
        plot_in_jupyter=False,
    ):

        (
            gammaM_start,
            gammaM_stop,
            gammaW_start,
            gammaW_stop,
            beta,
            zeta,
            muD,
            W_HX,
            W_YH,
            M_H,
            M_Y,
            D1,
            D2,
        ) = (
            self.gammaM_start,
            self.gammaM_stop,
            self.gammaW_start,
            self.gammaW_stop,
            self.beta,
            self.zeta,
            np.array(self.muD),
            self.W_HX,
            self.W_YH,
            self.M_H,
            self.M_Y,
            self.D1,
            self.D2,
        )
        LayerMinimumGains = self.LayerMinimumGains
        LayerMaximumGains = self.LayerMaximumGains
        debugging = self.set_ground_truth

        assert (
            X.shape[0] == self.x_dim
        ), "You must input the transpose, or you need to change one of the following hyperparameters: s_dim, x_dim"
        D1list = []
        D2list = []
        self.SV_list = []
        s_dim = self.s_dim
        h_dim = self.h_dim
        samples = X.shape[1]

        if self.Y is None:
            H = np.zeros((h_dim, samples))
            Y = np.zeros((s_dim, samples))
        else:
            H, Y = self.H, self.Y

        if debugging:
            SIR_list = self.SIR_list
            SNR_list = self.SNR_list
            S = self.S
            A = self.A
            Szeromean = S - S.mean(axis=1).reshape(-1, 1)
            plt.figure(figsize=(70, 50), dpi=80)

        for k in range(n_epochs):
            if shuffle:
                idx = np.random.permutation(samples)
            else:
                idx = np.arange(samples)

            for i_sample in tqdm(range(samples)):

                if ((i_sample + 1) % 100000) == 0:
                    muD = 0.99 * np.array(muD)

                x_current = X[:, idx[i_sample]]  # Take one input

                y = Y[:, idx[i_sample]]

                h = H[:, idx[i_sample]]
                neural_OUTPUT_COMP_TOL = self.neural_OUTPUT_COMP_TOL

                h, y, _ = self.run_neural_dynamics(
                    x_current=x_current,
                    h=h,
                    y=y,
                    M_H=M_H,
                    M_Y=M_Y,
                    W_HX=W_HX,
                    W_YH=W_YH,
                    D1=D1,
                    D2=D2,
                    beta=beta,
                    zeta=zeta,
                    neural_dynamic_iterations=neural_dynamic_iterations,
                    lr_start=neural_lr_start,
                    lr_stop=neural_lr_stop,
                    lr_rule=neural_loop_lr_rule,
                    lr_decay_multiplier=neural_lr_decay_multiplier,
                    neural_fast_start=neural_fast_start,
                    stlambd_lr=stlambd_lr,
                    hidden_layer_gain=hidden_layer_gain,
                    OUTPUT_COMP_TOL=neural_OUTPUT_COMP_TOL,
                )

                if synaptic_lr_rule == "constant":
                    MU_MH = gammaM_start[0]
                    MU_MY = gammaM_start[1]
                    MU_WHX = gammaW_start[0]
                    MU_WYH = gammaW_start[1]
                elif synaptic_lr_rule == "divide_by_log_index":
                    # MUS = np.max([gamma_start/(1 + np.log(2 + (i_sample))), gamma_stop])
                    MU_MH = np.max(
                        [
                            gammaM_start[0]
                            / (1 + np.log(2 + (i_sample // synaptic_lr_decay_divider))),
                            gammaM_stop[0],
                        ]
                    )
                    MU_MY = np.max(
                        [
                            gammaM_start[1]
                            / (1 + np.log(2 + (i_sample // synaptic_lr_decay_divider))),
                            gammaM_stop[1],
                        ]
                    )
                    MU_WHX = np.max(
                        [
                            gammaW_start[0]
                            / (1 + np.log(2 + (i_sample // synaptic_lr_decay_divider))),
                            gammaW_stop[0],
                        ]
                    )
                    MU_WYH = np.max(
                        [
                            gammaW_start[1]
                            / (1 + np.log(2 + (i_sample // synaptic_lr_decay_divider))),
                            gammaW_stop[1],
                        ]
                    )
                elif synaptic_lr_rule == "divide_by_index":
                    MU_MH = np.max([gammaM_start[0] / (i_sample + 1), gammaM_stop[0]])
                    MU_MY = np.max([gammaM_start[1] / (i_sample + 1), gammaM_stop[1]])
                    MU_WHX = np.max([gammaW_start[0] / (i_sample + 1), gammaW_stop[0]])
                    MU_WYH = np.max([gammaW_start[1] / (i_sample + 1), gammaW_stop[1]])

                W_HX, W_YH, M_H, M_Y, D1, D2 = self.update_weights_jit(
                    x_current,
                    h,
                    y,
                    zeta,
                    beta,
                    W_HX,
                    W_YH,
                    M_H,
                    M_Y,
                    D1,
                    D2,
                    MU_MH,
                    MU_MY,
                    MU_WHX,
                    MU_WYH,
                    muD,
                    LayerMinimumGains,
                    LayerMaximumGains,
                    clip_gain_gradients,
                    gain_grads_clipping_multiplier,
                    use_newton_steps_for_gains = use_newton_steps_for_gains,
                )

                Y[:, idx[i_sample]] = y
                H[:, idx[i_sample]] = h

                if debugging:
                    if ((i_sample % debug_iteration_point) == 0) | (i_sample == (samples - 1)):
                        try:
                            W = self.compute_overall_mapping_jit(
                                beta, zeta, D1, D2, M_H, M_Y, W_HX, W_YH
                            )
                            self.W = W

                            (
                                SINR_current,
                                SNR_current,
                                SGG,
                                Y_,
                                P,
                            ) = self.evaluate_for_debug(
                                W, A, S, X, mean_normalize_estimation=False
                            )

                            self.SV_list.append(abs(SGG))

                            SNR_list.append(SNR_current)
                            SIR_list.append(SINR_current)

                            if plot_in_jupyter:
                                D1list.append(
                                    D1.reshape(
                                        -1,
                                    )
                                )
                                D2list.append(
                                    D2.reshape(
                                        -1,
                                    )
                                )
                                YforPlot = Y[:, idx[i_sample - 25 : i_sample]].T
                                self.plot_for_debug(
                                    SIR_list,
                                    SNR_list,
                                    D1list,
                                    D2list,
                                    P,
                                    debug_iteration_point,
                                    YforPlot,
                                )

                            self.W_HX = W_HX
                            self.W_YH = W_YH
                            self.M_H = M_H
                            self.M_Y = M_Y
                            self.D1 = D1
                            self.D2 = D2

                            self.H = H
                            self.Y = Y
                            self.SIR_list = SIR_list
                            self.SNR_list = SNR_list
                        except Exception as e:
                            print(str(e))
        self.W_HX = W_HX
        self.W_YH = W_YH
        self.M_H = M_H
        self.M_Y = M_Y
        self.D1 = D1
        self.D2 = D2

        self.H = H
        self.Y = Y
        self.SIR_list = SIR_list
        self.SNR_list = SNR_list

class OnlineWSMBSSCanonical(OnlineWSMBSS):

    @staticmethod
    @njit
    def run_neural_dynamics_jit(
        x_current,
        h,
        y,
        Apoly,
        bpoly,
        M_H,
        M_Y,
        W_HX,
        W_YH,
        D1,
        D2,
        beta,
        zeta,
        neural_dynamic_iterations,
        lr_start,
        lr_stop,
        lr_rule,
        lr_decay_multiplier=0.005,
        lagrangian_lambd_lr = 0.01,
        hidden_layer_gain=100,
        mixtures_power_normalized=False,
        OUTPUT_COMP_TOL=1e-7,
    ):
        def offdiag(A, return_diag=False):
            """_summary_

            Args:
                A (_type_): _description_
                return_diag (bool, optional): _description_. Defaults to False.

            Returns:
                _type_: _description_
            """
            if return_diag:
                diag = np.diag(A)
                return A - np.diag(diag), diag
            else:
                return A - np.diag(diag)

        def SoftThresholding(X, thresh):
            X_absolute = np.abs(X)
            X_sign = np.sign(X)
            X_thresholded = (X_absolute > thresh) * (X_absolute - thresh) * X_sign
            return X_thresholded

        M_hat_H, Gamma_H = offdiag(M_H, True)
        M_hat_Y, Gamma_Y = offdiag(M_Y, True)

        mat_factor1 = (1 - zeta) * beta * (D1 * W_HX)
        mat_factor2 = (1 - zeta) * (1 - beta) * M_hat_H + (1 - zeta) * beta * (
            (D1 * M_hat_H) * D1.T
        )
        mat_factor3 = (1 - zeta) * (1 - beta) * (W_YH.T * D2.T)
        mat_factor4 = (1 - zeta) * Gamma_H * ((1 - beta) + beta * (D1.T) ** 2)
        mat_factor5 = M_hat_Y * D2.T
        mat_factor6 = Gamma_Y * D2.T
        if mixtures_power_normalized:
            mat_factor6 = (1 - zeta) * Gamma_Y * ((1 - beta) + beta * D2.T**2)
            # mat_factor6 = (1 - zeta) * Gamma_Y * ((1 - beta) * D2.T ** 2)

        v = mat_factor4[0] * h
        u = mat_factor6[0] * y

        lambda_Lagrangian = np.zeros(Apoly.shape[0])
        PreviousMembraneVoltages = {"v": np.zeros_like(v), "u": np.zeros_like(u)}
        MembraneVoltageNotSettled = 1
        OutputCounter = 0
        while MembraneVoltageNotSettled & (OutputCounter < neural_dynamic_iterations):
            OutputCounter += 1
            if lr_rule == "constant":
                MUV = lr_start
            elif lr_rule == "divide_by_loop_index":
                MUV = max(lr_start / (1 + OutputCounter), lr_stop)
            elif lr_rule == "divide_by_slow_loop_index":
                MUV = max(lr_start / (1 + OutputCounter * lr_decay_multiplier), lr_stop)

            delv = -v + mat_factor1 @ x_current - mat_factor2 @ h + mat_factor3 @ y
            v = v + MUV * delv
            h = v / mat_factor4[0]
            h = np.clip(h, -hidden_layer_gain, hidden_layer_gain)
            delu = -u + W_YH @ h - mat_factor5 @ y
            u = u + MUV * delu
            y = u / mat_factor6[0] - Apoly.T @ lambda_Lagrangian
            # y = np.clip(y, -1, 1)

            lambda_Lagrangian = np.maximum(lambda_Lagrangian + lagrangian_lambd_lr * (Apoly @ y - bpoly), 0)

            MembraneVoltageNotSettled = 0
            if (
                np.linalg.norm(v - PreviousMembraneVoltages["v"]) / np.linalg.norm(v)
                > OUTPUT_COMP_TOL
            ) | (
                np.linalg.norm(u - PreviousMembraneVoltages["u"]) / np.linalg.norm(u)
                > OUTPUT_COMP_TOL
            ):
                MembraneVoltageNotSettled = 1
            PreviousMembraneVoltages["v"] = v
            PreviousMembraneVoltages["u"] = u

        return h, y, OutputCounter

    def fit_batch(
        self,
        X,
        Apoly,
        bpoly,
        n_epochs=1,
        neural_dynamic_iterations=750,
        neural_lr_start=0.2,
        neural_lr_stop=0.05,
        lagrangian_lambd_lr=0.01,
        synaptic_lr_rule="divide_by_log_index",
        neural_loop_lr_rule="divide_by_slow_loop_index",
        synaptic_lr_decay_divider=5000,
        neural_lr_decay_multiplier=0.005,
        hidden_layer_gain=10,
        clip_gain_gradients=False,
        gain_grads_clipping_multiplier = 1,
        use_newton_steps_for_gains = False,
        mixtures_power_normalized=False,
        shuffle=True,
        debug_iteration_point=1000,
        plot_in_jupyter=False,
    ):

        (
            gammaM_start,
            gammaM_stop,
            gammaW_start,
            gammaW_stop,
            beta,
            zeta,
            muD,
            W_HX,
            W_YH,
            M_H,
            M_Y,
            D1,
            D2,
        ) = (
            self.gammaM_start,
            self.gammaM_stop,
            self.gammaW_start,
            self.gammaW_stop,
            self.beta,
            self.zeta,
            np.array(self.muD),
            self.W_HX,
            self.W_YH,
            self.M_H,
            self.M_Y,
            self.D1,
            self.D2,
        )
        LayerMinimumGains = self.LayerMinimumGains
        LayerMaximumGains = self.LayerMaximumGains
        debugging = self.set_ground_truth

        assert (
            X.shape[0] == self.x_dim
        ), "You must input the transpose, or you need to change one of the following hyperparameters: s_dim, x_dim"
        D1list = []
        D2list = []
        self.SV_list = []
        s_dim = self.s_dim
        h_dim = self.h_dim
        samples = X.shape[1]

        if self.Y is None:
            H = np.zeros((h_dim, samples))
            Y = np.zeros((s_dim, samples))
        else:
            H, Y = self.H, self.Y

        if debugging:
            SIR_list = self.SIR_list
            SNR_list = self.SNR_list
            S = self.S
            A = self.A
            plt.figure(figsize=(70, 50), dpi=80)

        for k in range(n_epochs):
            if shuffle:
                idx = np.random.permutation(samples)
            else:
                idx = np.arange(samples)

            for i_sample in tqdm(range(samples)):

                if ((i_sample + 1) % 100000) == 0:
                    muD = 0.99 * np.array(muD)

                x_current = X[:, idx[i_sample]]  # Take one input

                y = Y[:, idx[i_sample]]

                h = H[:, idx[i_sample]]
                neural_OUTPUT_COMP_TOL = self.neural_OUTPUT_COMP_TOL

                h, y, _ = self.run_neural_dynamics_jit(
                    x_current=x_current,
                    h=h,
                    y=y,
                    Apoly=Apoly,
                    bpoly=bpoly,
                    M_H=M_H,
                    M_Y=M_Y,
                    W_HX=W_HX,
                    W_YH=W_YH,
                    D1=D1,
                    D2=D2,
                    beta=beta,
                    zeta=zeta,
                    neural_dynamic_iterations=neural_dynamic_iterations,
                    lr_start=neural_lr_start,
                    lr_stop=neural_lr_stop,
                    lr_rule=neural_loop_lr_rule,
                    lr_decay_multiplier=neural_lr_decay_multiplier,
                    lagrangian_lambd_lr=lagrangian_lambd_lr,
                    hidden_layer_gain=hidden_layer_gain,
                    mixtures_power_normalized=mixtures_power_normalized,
                    OUTPUT_COMP_TOL=neural_OUTPUT_COMP_TOL,
                )

                if synaptic_lr_rule == "constant":
                    MU_MH = gammaM_start[0]
                    MU_MY = gammaM_start[1]
                    MU_WHX = gammaW_start[0]
                    MU_WYH = gammaW_start[1]
                elif synaptic_lr_rule == "divide_by_log_index":
                    # MUS = np.max([gamma_start/(1 + np.log(2 + (i_sample))), gamma_stop])
                    MU_MH = np.max(
                        [
                            gammaM_start[0]
                            / (1 + np.log(2 + (i_sample // synaptic_lr_decay_divider))),
                            gammaM_stop[0],
                        ]
                    )
                    MU_MY = np.max(
                        [
                            gammaM_start[1]
                            / (1 + np.log(2 + (i_sample // synaptic_lr_decay_divider))),
                            gammaM_stop[1],
                        ]
                    )
                    MU_WHX = np.max(
                        [
                            gammaW_start[0]
                            / (1 + np.log(2 + (i_sample // synaptic_lr_decay_divider))),
                            gammaW_stop[0],
                        ]
                    )
                    MU_WYH = np.max(
                        [
                            gammaW_start[1]
                            / (1 + np.log(2 + (i_sample // synaptic_lr_decay_divider))),
                            gammaW_stop[1],
                        ]
                    )
                elif synaptic_lr_rule == "divide_by_index":
                    MU_MH = np.max([gammaM_start[0] / (i_sample + 1), gammaM_stop[0]])
                    MU_MY = np.max([gammaM_start[1] / (i_sample + 1), gammaM_stop[1]])
                    MU_WHX = np.max([gammaW_start[0] / (i_sample + 1), gammaW_stop[0]])
                    MU_WYH = np.max([gammaW_start[1] / (i_sample + 1), gammaW_stop[1]])

                W_HX, W_YH, M_H, M_Y, D1, D2 = self.update_weights_jit(
                    x_current,
                    h,
                    y,
                    zeta,
                    beta,
                    W_HX,
                    W_YH,
                    M_H,
                    M_Y,
                    D1,
                    D2,
                    MU_MH,
                    MU_MY,
                    MU_WHX,
                    MU_WYH,
                    muD,
                    LayerMinimumGains,
                    LayerMaximumGains,
                    clip_gain_gradients,
                    gain_grads_clipping_multiplier,
                    use_newton_steps_for_gains = use_newton_steps_for_gains,
                )

                Y[:, idx[i_sample]] = y
                H[:, idx[i_sample]] = h

                if debugging:
                    if (i_sample % debug_iteration_point) == 0:
                        try:
                            W = self.compute_overall_mapping_jit(
                                beta, zeta, D1, D2, M_H, M_Y, W_HX, W_YH
                            )
                            self.W = W

                            (
                                SINR_current,
                                SNR_current,
                                SGG,
                                Y_,
                                P,
                            ) = self.evaluate_for_debug(W, A, S, X)

                            self.SV_list.append(abs(SGG))

                            SNR_list.append(SNR_current)
                            SIR_list.append(SINR_current)

                            if plot_in_jupyter:
                                D1list.append(
                                    D1.reshape(
                                        -1,
                                    )
                                )
                                D2list.append(
                                    D2.reshape(
                                        -1,
                                    )
                                )
                                YforPlot = Y[:, idx[i_sample - 25 : i_sample]].T
                                self.plot_for_debug(
                                    SIR_list,
                                    SNR_list,
                                    D1list,
                                    D2list,
                                    P,
                                    debug_iteration_point,
                                    YforPlot,
                                )

                            self.W_HX = W_HX
                            self.W_YH = W_YH
                            self.M_H = M_H
                            self.M_Y = M_Y
                            self.D1 = D1
                            self.D2 = D2

                            self.H = H
                            self.Y = Y
                            self.SIR_list = SIR_list
                            self.SNR_list = SNR_list
                        except Exception as e:
                            print(str(e))
        self.W_HX = W_HX
        self.W_YH = W_YH
        self.M_H = M_H
        self.M_Y = M_Y
        self.D1 = D1
        self.D2 = D2

        self.H = H
        self.Y = Y
        self.SIR_list = SIR_list
        self.SNR_list = SNR_list

class OnlineWSMICA(OnlineWSMBSS):
    #### ONLY WRITTEN TO TRY. NO SUCCESS YET
    @staticmethod
    @njit
    def run_neural_dynamics_ica_jit(
        x_current,
        h,
        y,
        M_H,
        M_Y,
        W_HX,
        W_YH,
        D1,
        D2,
        beta,
        zeta,
        neural_dynamic_iterations,
        lr_start,
        lr_stop,
        lr_rule,
        hidden_layer_gain=20,
        output_activation="tanh",
        OUTPUT_COMP_TOL=1e-7,
    ):
        """_summary_

        Args:
            x_current (_type_): _description_
            h (_type_): _description_
            y (_type_): _description_
            M_H (_type_): _description_
            M_Y (_type_): _description_
            W_HX (_type_): _description_
            W_YH (_type_): _description_
            D1 (_type_): _description_
            D2 (_type_): _description_
            beta (_type_): _description_
            zeta (_type_): _description_
            neural_dynamic_iterations (_type_): _description_
            lr_start (_type_): _description_
            lr_stop (_type_): _description_
            OUTPUT_COMP_TOL (_type_): _description_
        """

        def offdiag(A, return_diag=False):
            """_summary_

            Args:
                A (_type_): _description_
                return_diag (bool, optional): _description_. Defaults to False.

            Returns:
                _type_: _description_
            """
            if return_diag:
                diag = np.diag(A)
                return A - np.diag(diag), diag
            else:
                return A - np.diag(diag)

        M_hat_H, Gamma_H = offdiag(M_H, True)
        M_hat_Y, Gamma_Y = offdiag(M_Y, True)

        mat_factor1 = (1 - zeta) * beta * (D1 * W_HX)
        mat_factor2 = (1 - zeta) * (1 - beta) * M_hat_H + (1 - zeta) * beta * (
            (D1 * M_hat_H) * D1.T
        )
        mat_factor3 = (1 - zeta) * (1 - beta) * (W_YH.T * D2.T)
        mat_factor4 = (1 - zeta) * Gamma_H * ((1 - beta) + beta * (D1.T) ** 2)
        mat_factor5 = M_hat_Y * D2.T
        mat_factor6 = Gamma_Y * D2.T

        v = mat_factor4[0] * h
        u = mat_factor6[0] * y

        PreviousMembraneVoltages = {"v": np.zeros_like(v), "u": np.zeros_like(u)}
        MembraneVoltageNotSettled = 1
        OutputCounter = 0
        while MembraneVoltageNotSettled & (OutputCounter < neural_dynamic_iterations):
            OutputCounter += 1
            if lr_rule == "constant":
                MUV = lr_start
            elif lr_rule == "divide_by_loop_index":
                MUV = max(lr_start / (1 + OutputCounter), lr_stop)
            elif lr_rule == "divide_by_slow_loop_index":
                MUV = max(lr_start / (1 + OutputCounter * 0.05), lr_stop)

            delv = -v + mat_factor1 @ x_current - mat_factor2 @ h + mat_factor3 @ y
            v = v + MUV * delv
            h = v / mat_factor4[0]
            h = np.clip(h, -hidden_layer_gain, hidden_layer_gain)
            delu = -u + W_YH @ h - mat_factor5 @ y
            u = u + MUV * delu
            y = u / mat_factor6[0]
            if output_activation == "tanh":
                y = np.tanh(y)
            elif output_activation == "linear":
                y = y

            MembraneVoltageNotSettled = 0
            if (
                np.linalg.norm(v - PreviousMembraneVoltages["v"]) / np.linalg.norm(v)
                > OUTPUT_COMP_TOL
            ) | (
                np.linalg.norm(u - PreviousMembraneVoltages["u"]) / np.linalg.norm(u)
                > OUTPUT_COMP_TOL
            ):
                MembraneVoltageNotSettled = 1
            PreviousMembraneVoltages["v"] = v
            PreviousMembraneVoltages["u"] = u

        return h, y, OutputCounter

    def fit_batch_ica(
        self,
        X,
        n_epochs=5,
        neural_dynamic_iterations=750,
        neural_lr_start=0.2,
        neural_lr_stop=0.05,
        synaptic_lr_rule="divide_by_log_index",
        neural_loop_lr_rule="divide_by_slow_loop_index",
        hidden_layer_gain=2,
        clip_gain_gradients=True,
        output_activation="tanh",
        shuffle=True,
        debug_iteration_point=1000,
        plot_in_jupyter=False,
    ):
        """_summary_

        Args:
            X (_type_): _description_
            n_epochs (int, optional): _description_. Defaults to 5.
            neural_dynamic_iterations (int, optional): _description_. Defaults to 750.
            neural_lr_start (float, optional): _description_. Defaults to 0.2.
            neural_lr_stop (float, optional): _description_. Defaults to 0.05.
            shuffle (bool, optional): _description_. Defaults to True.
            debug_iteration_point (int, optional): _description_. Defaults to 1000.
            plot_in_jupyter (bool, optional): _description_. Defaults to False.
        """
        (
            gammaM_start,
            gammaM_stop,
            gammaW_start,
            gammaW_stop,
            beta,
            zeta,
            muD,
            W_HX,
            W_YH,
            M_H,
            M_Y,
            D1,
            D2,
        ) = (
            self.gammaM_start,
            self.gammaM_stop,
            self.gammaW_start,
            self.gammaW_stop,
            self.beta,
            self.zeta,
            np.array(self.muD),
            self.W_HX,
            self.W_YH,
            self.M_H,
            self.M_Y,
            self.D1,
            self.D2,
        )
        LayerMinimumGains = self.LayerMinimumGains
        LayerMaximumGains = self.LayerMaximumGains
        debugging = self.set_ground_truth

        assert (
            X.shape[0] == self.x_dim
        ), "You must input the transpose, or you need to change one of the following hyperparameters: s_dim, x_dim"
        D1list = []
        D2list = []
        self.SV_list = []
        s_dim = self.s_dim
        h_dim = self.h_dim
        samples = X.shape[1]

        if self.Y is None:
            H = np.zeros((h_dim, samples))
            Y = np.zeros((s_dim, samples))
        else:
            H, Y = self.H, self.Y

        if debugging:
            SIR_list = self.SIR_list
            SNR_list = self.SNR_list
            S = self.S
            A = self.A
            Szeromean = S - S.mean(axis=1).reshape(-1, 1)
            plt.figure(figsize=(70, 50), dpi=80)

        for k in range(n_epochs):
            if shuffle:
                idx = np.random.permutation(samples)
            else:
                idx = np.arange(samples)

            for i_sample in tqdm(range(samples)):

                if ((i_sample + 1) % 100000) == 0:
                    muD = 0.99 * np.array(muD)

                x_current = X[:, idx[i_sample]]  # Take one input

                y = Y[:, idx[i_sample]]

                h = H[:, idx[i_sample]]
                neural_OUTPUT_COMP_TOL = self.neural_OUTPUT_COMP_TOL

                h, y, _ = self.run_neural_dynamics_ica_jit(
                    x_current=x_current,
                    h=h,
                    y=y,
                    M_H=M_H,
                    M_Y=M_Y,
                    W_HX=W_HX,
                    W_YH=W_YH,
                    D1=D1,
                    D2=D2,
                    beta=beta,
                    zeta=zeta,
                    neural_dynamic_iterations=neural_dynamic_iterations,
                    lr_start=neural_lr_start,
                    lr_stop=neural_lr_stop,
                    lr_rule=neural_loop_lr_rule,
                    hidden_layer_gain=hidden_layer_gain,
                    output_activation=output_activation,
                    OUTPUT_COMP_TOL=neural_OUTPUT_COMP_TOL,
                )

                if synaptic_lr_rule == "constant":
                    MU_MH = gammaM_start[0]
                    MU_MY = gammaM_start[1]
                    MU_WHX = gammaW_start[0]
                    MU_WYH = gammaW_start[1]
                elif synaptic_lr_rule == "divide_by_log_index":
                    # MUS = np.max([gamma_start/(1 + np.log(2 + (i_sample))), gamma_stop])
                    MU_MH = np.max(
                        [
                            gammaM_start[0] / (1 + np.log(2 + (i_sample // 5000))),
                            gammaM_stop[0],
                        ]
                    )
                    MU_MY = np.max(
                        [
                            gammaM_start[1] / (1 + np.log(2 + (i_sample // 5000))),
                            gammaM_stop[1],
                        ]
                    )
                    MU_WHX = np.max(
                        [
                            gammaW_start[0] / (1 + np.log(2 + (i_sample // 5000))),
                            gammaW_stop[0],
                        ]
                    )
                    MU_WYH = np.max(
                        [
                            gammaW_start[1] / (1 + np.log(2 + (i_sample // 5000))),
                            gammaW_stop[1],
                        ]
                    )
                elif synaptic_lr_rule == "divide_by_index":
                    MU_MH = np.max([gammaM_start[0] / (i_sample + 1), gammaM_stop[0]])
                    MU_MY = np.max([gammaM_start[1] / (i_sample + 1), gammaM_stop[1]])
                    MU_WHX = np.max([gammaW_start[0] / (i_sample + 1), gammaW_stop[0]])
                    MU_WYH = np.max([gammaW_start[1] / (i_sample + 1), gammaW_stop[1]])

                W_HX, W_YH, M_H, M_Y, D1, D2 = self.update_weights_jit(
                    x_current,
                    h,
                    y,
                    zeta,
                    beta,
                    W_HX,
                    W_YH,
                    M_H,
                    M_Y,
                    D1,
                    D2,
                    MU_MH,
                    MU_MY,
                    MU_WHX,
                    MU_WYH,
                    muD,
                    LayerMinimumGains,
                    LayerMaximumGains,
                    clip_gain_gradients,
                )

                Y[:, idx[i_sample]] = y
                H[:, idx[i_sample]] = h

                if debugging:
                    if (i_sample % debug_iteration_point) == 0:
                        try:
                            W = self.compute_overall_mapping_jit(
                                beta, zeta, D1, D2, M_H, M_Y, W_HX, W_YH
                            )
                            self.W = W

                            (
                                SINR_current,
                                SNR_current,
                                SGG,
                                Y_,
                                P,
                            ) = self.evaluate_for_debug(
                                W, A, Szeromean, X, mean_normalize_estimation=True
                            )

                            self.SV_list.append(abs(SGG))

                            SNR_list.append(SNR_current)
                            SIR_list.append(SINR_current)

                            if plot_in_jupyter:
                                D1list.append(
                                    D1.reshape(
                                        -1,
                                    )
                                )
                                D2list.append(
                                    D2.reshape(
                                        -1,
                                    )
                                )
                                YforPlot = Y[:, idx[i_sample - 25 : i_sample]].T
                                self.plot_for_debug(
                                    SIR_list,
                                    SNR_list,
                                    D1list,
                                    D2list,
                                    P,
                                    debug_iteration_point,
                                    YforPlot,
                                )

                            self.W_HX = W_HX
                            self.W_YH = W_YH
                            self.M_H = M_H
                            self.M_Y = M_Y
                            self.D1 = D1
                            self.D2 = D2

                            self.H = H
                            self.Y = Y
                            self.SIR_list = SIR_list
                            self.SNR_list = SNR_list
                        except Exception as e:
                            print(str(e))
        self.W_HX = W_HX
        self.W_YH = W_YH
        self.M_H = M_H
        self.M_Y = M_Y
        self.D1 = D1
        self.D2 = D2

        self.H = H
        self.Y = Y
        self.SIR_list = SIR_list
        self.SNR_list = SNR_list

################ WEIGHTED SIMILARITY MATCHING BLIND SOURCE SEPARATION #######################
class OnlineWSMBSSv2(BSSBaseClass):
    """_summary_"""

    def __init__(
        self,
        s_dim,
        x_dim,
        h_dim=None,
        gammaW_HX_start=[0.2, 0.2],
        gammaW_HX_stop=[0.001, 0.001],
        gammaM_H_start=[0.2, 0.2],
        gammaM_H_stop=[0.001, 0.001],
        gammaW_YH_start=[0.2, 0.2],
        gammaW_YH_stop=[0.001, 0.001],
        gammaM_Y_start=[0.2, 0.2],
        gammaM_Y_stop=[0.001, 0.001],
        beta=0.5,
        zeta=1e-4,
        muD=[25, 25],
        W_HX=None,
        W_YH=None,
        M_H=None,
        M_Y=None,
        D1=None,
        D2=None,
        WScalings=[0.0033, 0.0033],
        GamScalings=[0.02, 0.02],
        DScalings=[25, 1],
        LayerMinimumGains=[1e-6, 1],
        LayerMaximumGains=[1e6, 1],
        neural_OUTPUT_COMP_TOL=1e-5,
        set_ground_truth=False,
        S=None,
        A=None,
    ):
        """_summary_

        Args:
            s_dim (_type_): _description_
            x_dim (_type_): _description_
            h_dim (_type_, optional): _description_. Defaults to None.
            gamma_start (float, optional): _description_. Defaults to 0.2.
            gamma_stop (float, optional): _description_. Defaults to 0.001.
            beta (float, optional): _description_. Defaults to 0.5.
            zeta (_type_, optional): _description_. Defaults to 1e-4.
            muD (list, optional): _description_. Defaults to [25,25].
            W_HX (_type_, optional): _description_. Defaults to None.
            W_YH (_type_, optional): _description_. Defaults to None.
            M_H (_type_, optional): _description_. Defaults to None.
            M_Y (_type_, optional): _description_. Defaults to None.
            D1 (_type_, optional): _description_. Defaults to None.
            D2 (_type_, optional): _description_. Defaults to None.
            WScalings (list, optional): _description_. Defaults to [0.0033,0.0033].
            GamScalings (list, optional): _description_. Defaults to [0.02, 0.02].
            DScalings (list, optional): _description_. Defaults to [25,1].
            LayerMinimumGains (list, optional): _description_. Defaults to [1e-6,1].
            LayerMaximumGains (list, optional): _description_. Defaults to [1e6,1].
            neural_OUTPUT_COMP_TOL (_type_, optional): _description_. Defaults to 1e-5.
            set_ground_truth (bool, optional): _description_. Defaults to False.
            S (_type_, optional): _description_. Defaults to None.
            A (_type_, optional): _description_. Defaults to None.
        """
        if h_dim is None:
            h_dim = s_dim
        else:
            h_dim = h_dim

        if W_HX is not None:
            assert W_HX.shape == (
                h_dim,
                x_dim,
            ), "The shape of the initial guess W must be (h_dim,x_dim)=(%d,%d)" % (
                h_dim,
                x_dim,
            )
            W_HX = W_HX
        else:
            W_HX = np.random.standard_normal(size=(h_dim, x_dim))
            for k in range(W_HX.shape[0]):
                W_HX[k, :] = WScalings[0] * W_HX[k, :] / np.linalg.norm(W_HX[k, :])

        if W_YH is not None:
            assert W_YH.shape == (
                s_dim,
                h_dim,
            ), "The shape of the initial guess W must be (s_dim,h_dim)=(%d,%d)" % (
                s_dim,
                h_dim,
            )
            W_YH = W_YH
        else:
            W_YH = np.random.standard_normal(size=(s_dim, h_dim))
            for k in range(W_YH.shape[0]):
                W_YH[k, :] = WScalings[1] * W_YH[k, :] / np.linalg.norm(W_YH[k, :])

        if M_H is not None:
            assert M_H.shape == (
                h_dim,
                h_dim,
            ), "The shape of the initial guess M must be (h_dim,h_dim)=(%d,%d)" % (
                h_dim,
                h_dim,
            )
            M_H = M_H
        else:
            M_H = GamScalings[0] * np.eye(h_dim)

        if M_Y is not None:
            assert M_Y.shape == (
                s_dim,
                s_dim,
            ), "The shape of the initial guess M must be (s_dim,s_dim)=(%d,%d)" % (
                s_dim,
                s_dim,
            )
            M_Y = M_Y
        else:
            M_Y = GamScalings[1] * np.eye(s_dim)

        if D1 is not None:
            assert D1.shape == (
                h_dim,
                1,
            ), "The shape of the initial guess D must be (h_dim,h_dim)=(%d,%d)" % (
                h_dim,
                h_dim,
            )
            D1 = D1
        else:
            D1 = DScalings[0] * np.ones((h_dim, 1))

        if D2 is not None:
            assert D2.shape == (
                s_dim,
                1,
            ), "The shape of the initial guess D must be (s_dim,s_dim)=(%d,%d)" % (
                s_dim,
                s_dim,
            )
            D2 = D2
        else:
            D2 = DScalings[1] * np.ones((s_dim, 1))

        self.s_dim = s_dim
        self.h_dim = h_dim
        self.x_dim = x_dim
        if isinstance(gammaM_H_start, list):
            gammaM_H_start = np.array(gammaM_H_start)
        if isinstance(gammaM_H_stop, list):
            gammaM_H_stop = np.array(gammaM_H_stop)
        if isinstance(gammaW_HX_start, list):
            gammaW_HX_start = np.array(gammaW_HX_start)
        if isinstance(gammaW_HX_stop, list):
            gammaW_HX_stop = np.array(gammaW_HX_stop)
        if isinstance(gammaM_Y_start, list):
            gammaM_Y_start = np.array(gammaM_Y_start)
        if isinstance(gammaM_Y_stop, list):
            gammaM_Y_stop = np.array(gammaM_Y_stop)
        if isinstance(gammaW_YH_start, list):
            gammaW_YH_start = np.array(gammaW_YH_start)
        if isinstance(gammaW_YH_stop, list):
            gammaW_YH_stop = np.array(gammaW_YH_stop)
        self.gammaM_H_start = gammaM_H_start
        self.gammaM_H_stop = gammaM_H_stop
        self.gammaW_HX_start = gammaW_HX_start
        self.gammaW_HX_stop = gammaW_HX_stop
        self.gammaM_Y_start = gammaM_Y_start
        self.gammaM_Y_stop = gammaM_Y_stop
        self.gammaW_YH_start = gammaW_YH_start
        self.gammaW_YH_stop = gammaW_YH_stop
        self.beta = beta
        self.zeta = zeta
        self.muD = muD
        self.W_HX = W_HX
        self.W_YH = W_YH
        self.M_H = M_H
        self.M_Y = M_Y
        self.D1 = D1
        self.D2 = D2
        self.neural_OUTPUT_COMP_TOL = neural_OUTPUT_COMP_TOL
        if isinstance(LayerMinimumGains, list):
            LayerMinimumGains = np.array(LayerMinimumGains)
        if isinstance(LayerMaximumGains, list):
            LayerMaximumGains = np.array(LayerMaximumGains)
        self.LayerMinimumGains = LayerMinimumGains
        self.LayerMaximumGains = LayerMaximumGains
        self.Y = None
        self.H = None
        self.WScalings = WScalings
        self.sample_index = 0
        ### Ground Truth Sources and Mixing Matrix For Debugging
        self.set_ground_truth = set_ground_truth
        self.S = S  # Sources
        self.A = A  # Mixing Matrix
        self.SIR_list = []
        self.SNR_list = []

    ############################################################################################
    ############### REQUIRED FUNCTIONS FOR DEBUGGING ###########################################
    ############################################################################################
    def evaluate_for_debug(self, W, A, S, X, mean_normalize_estimation=False):

        s_dim = self.s_dim
        Y_ = W @ X
        if mean_normalize_estimation:
            Y_ = Y_ - Y_.mean(axis=1).reshape(-1, 1)
        Y_ = self.signed_and_permutation_corrected_sources(S, Y_)
        coef_ = ((Y_ * S).sum(axis=1) / (Y_ * Y_).sum(axis=1)).reshape(-1, 1)
        Y_ = coef_ * Y_

        SINR = 10 * np.log10(self.CalculateSINRjit(Y_, S, False)[0])
        SNR = self.snr_jit(S, Y_)

        T = W @ A
        Tabs = np.abs(T)
        P = np.zeros((s_dim, s_dim))

        for SourceIndex in range(s_dim):
            Tmax = np.max(Tabs[SourceIndex, :])
            Tabs[SourceIndex, :] = Tabs[SourceIndex, :] / Tmax
            P[SourceIndex, :] = Tabs[SourceIndex, :] > 0.999

        GG = P.T @ T
        _, SGG, _ = np.linalg.svd(
            GG
        )  # SGG is the singular values of overall matrix Wf @ A

        return SINR, SNR, SGG, Y_, P

    def plot_for_debug(
        self, SIR_list, SNR_list, D1list, D2list, P, debug_iteration_point, YforPlot
    ):
        pl.clf()
        pl.subplot(3, 2, 1)
        pl.plot(np.array(SIR_list), linewidth=5)
        pl.xlabel("Number of Iterations / {}".format(debug_iteration_point), fontsize=45)
        pl.ylabel("SIR (dB)", fontsize=45)
        pl.title("SIR Behaviour", fontsize=45)
        pl.grid()
        pl.xticks(fontsize=45)
        pl.yticks(fontsize=45)

        pl.subplot(3, 2, 2)
        pl.plot(np.array(SNR_list), linewidth=5)
        pl.grid()
        pl.title("Component SNR Check", fontsize=45)
        pl.ylabel("SNR (dB)", fontsize=45)
        pl.xlabel("Number of Iterations / {}".format(debug_iteration_point), fontsize=45)
        pl.xticks(fontsize=45)
        pl.yticks(fontsize=45)

        pl.subplot(3, 2, 3)
        pl.plot(np.array(D1list), linewidth=5)
        pl.grid()
        pl.title("Diagonal Values of D1", fontsize=45)
        pl.xlabel("Number of Iterations / {}".format(debug_iteration_point), fontsize=45)
        pl.xticks(fontsize=45)
        pl.yticks(fontsize=45)

        pl.subplot(3, 2, 4)
        pl.plot(np.array(D2list), linewidth=5)
        pl.grid()
        pl.title("Diagonal Values of D2", fontsize=45)
        pl.xlabel("Number of Iterations / {}".format(debug_iteration_point), fontsize=45)
        pl.xticks(fontsize=45)
        pl.yticks(fontsize=45)

        pl.subplot(3, 2, 5)
        pl.plot(np.array(self.SV_list), linewidth=5)
        pl.grid()
        pl.title(
            "Singular Value Check, Overall Matrix Rank: "
            + str(np.linalg.matrix_rank(P)),
            fontsize=45,
        )
        pl.xlabel("Number of Iterations / {}".format(debug_iteration_point), fontsize=45)
        pl.xticks(fontsize=45)
        pl.yticks(fontsize=45)

        pl.subplot(3, 2, 6)
        pl.plot(YforPlot, linewidth=5)
        pl.title("Y last 25", fontsize=45)
        pl.grid()
        pl.xticks(fontsize=45)
        pl.yticks(fontsize=45)

        clear_output(wait=True)
        display(pl.gcf())

    @staticmethod
    @njit
    def compute_overall_mapping_jit(beta, zeta, D1, D2, M_H, M_Y, W_HX, W_YH):
        """_summary_

        Args:
            beta (_type_): _description_
            zeta (_type_): _description_
            D1 (_type_): _description_
            D2 (_type_): _description_
            M_H (_type_): _description_
            M_Y (_type_): _description_
            W_HX (_type_): _description_
            W_YH (_type_): _description_

        Returns:
            _type_: _description_
        """
        # Mapping from xt -> ht
        A = (1 - zeta) * (
            beta * ((D1 * M_H) * D1.T)
            + (1 - beta) * (M_H - W_YH.T @ np.linalg.solve(M_Y, W_YH))
        )
        b = (1 - zeta) * beta * (D1 * W_HX)
        WL1 = np.linalg.solve(A, b)
        # Mapping from ht -> yt
        WL2 = np.linalg.solve(M_Y * D2.T, W_YH)
        W = WL2 @ WL1
        return W

    def compute_overall_mapping(self, return_mapping=False):
        """_summary_

        Args:
            return_mapping (bool, optional): _description_. Defaults to False.

        Returns:
            _type_: _description_
        """
        beta, zeta, D1, D2, M_H, M_Y, W_HX, W_YH = (
            self.beta,
            self.zeta,
            self.D1,
            self.D2,
            self.M_H,
            self.M_Y,
            self.W_HX,
            self.W_YH,
        )
        W = self.compute_overall_mapping_jit(beta, zeta, D1, D2, M_H, M_Y, W_HX, W_YH)
        self.W = W

        if return_mapping:
            return W

    def predict(self, X):
        """_summary_

        Args:
            X (_type_): _description_

        Returns:
            _type_: _description_
        """
        beta, zeta, W_HX, W_YH, M_H, M_Y, D1, D2 = (
            self.beta,
            self.zeta,
            self.W_HX,
            self.W_YH,
            self.M_H,
            self.M_Y,
            self.D1,
            self.D2,
        )
        W = self.compute_overall_mapping_jit(beta, zeta, D1, D2, M_H, M_Y, W_HX, W_YH)
        return W @ X

    @staticmethod
    @njit
    def update_weights_jit(
        x_current,
        h,
        y,
        zeta,
        beta,
        W_HX,
        W_YH,
        M_H,
        M_Y,
        D1,
        D2,
        MU_MH,
        MU_MY,
        MU_WHX,
        MU_WYH,
        muD,
        LayerMinimumGains,
        LayerMaximumGains,
        clip_gain_gradients=False,
        gain_grads_clipping_multiplier = 1,
    ):
        """_summary_

        Args:
            x_current (_type_): _description_
            h (_type_): _description_
            y (_type_): _description_
            zeta (_type_): _description_
            beta (_type_): _description_
            W_HX (_type_): _description_
            W_YH (_type_): _description_
            M_H (_type_): _description_
            M_Y (_type_): _description_
            D1 (_type_): _description_
            D2 (_type_): _description_
            MUS (_type_): _description_
            muD (_type_): _description_
            LayerMinimumGains (_type_): _description_
            LayerMaximumGains (_type_): _description_
        """

        def clipping(inp, lev):
            out = inp * (np.abs(inp) <= lev) + lev * (inp > lev) - lev * (inp < -lev)
            return out
        D1_prev = D1
        D2_prev = D2

        M_H = (1 - MU_MH) * M_H + MU_MH * np.outer(h, h)
        W_HX = (1 - MU_WHX) * W_HX + MU_WHX * np.outer(h, x_current)

        M_Y = (1 - MU_MY) * M_Y + MU_MY * np.outer(y, y)
        W_YH = (1 - MU_WYH) * W_YH + MU_WYH * np.outer(y, h)

        D1derivative = (1 - zeta) * beta * (
            np.sum((np.abs(M_H) ** 2) * D1.T, axis=1)
            - np.sum(np.abs(W_HX) ** 2, axis=1)
        ).reshape(-1, 1) + zeta * (
            1 / D1
        )  # + zeta * self.dlogdet(D1)
        if clip_gain_gradients:
            D1 = D1 - clipping(muD[0] * D1derivative, D1 * gain_grads_clipping_multiplier)
        else:
            D1 = D1 - muD[0] * D1derivative
        D1 = np.clip(D1, LayerMinimumGains[0], LayerMaximumGains[0])
        D2derivative = (1 - zeta) * (1 - beta) * (
            np.sum((np.abs(M_Y) ** 2) * D2.T, axis=1)
            - np.sum(np.abs(W_YH) ** 2, axis=1)
        ).reshape(-1, 1) + zeta * (
            1 / D2
        )  # + zeta * self.dlogdet(D2)
        if clip_gain_gradients:
            D2 = D2 - clipping(muD[1] * D2derivative, D2 * gain_grads_clipping_multiplier)
        else:
            D2 = D2 - muD[1] * D2derivative
        D2 = np.clip(D2, LayerMinimumGains[1], LayerMaximumGains[1])
        if np.min(D1 - LayerMinimumGains[0]) < 0.1:
            D1 = D1_prev
        if np.min(D2 - LayerMinimumGains[1]) < 0.1:
            D2 = D2_prev
        return W_HX, W_YH, M_H, M_Y, D1, D2

    ###############################################################
    ############### NEURAL DYNAMICS ALGORITHMS ####################
    ###############################################################
    @staticmethod
    @njit
    def run_neural_dynamics_antisparse_jit(
        x_current,
        h,
        y,
        M_H,
        M_Y,
        W_HX,
        W_YH,
        D1,
        D2,
        beta,
        zeta,
        neural_dynamic_iterations,
        lr_start,
        lr_stop,
        lr_rule,
        lr_decay_multiplier=0.01,
        hidden_layer_gain=2,
        OUTPUT_COMP_TOL=1e-7,
    ):
        """_summary_

        Args:
            x_current (_type_): _description_
            h (_type_): _description_
            y (_type_): _description_
            M_H (_type_): _description_
            M_Y (_type_): _description_
            W_HX (_type_): _description_
            W_YH (_type_): _description_
            D1 (_type_): _description_
            D2 (_type_): _description_
            beta (_type_): _description_
            zeta (_type_): _description_
            neural_dynamic_iterations (_type_): _description_
            lr_start (_type_): _description_
            lr_stop (_type_): _description_
            OUTPUT_COMP_TOL (_type_): _description_
        """
        # def ddiag(A):
        #     return np.diag(np.diag(A))

        def offdiag(A, return_diag=False):
            if return_diag:
                diag = np.diag(A)
                return A - np.diag(diag), diag
            else:
                return A - np.diag(diag)

        M_hat_H, Gamma_H = offdiag(M_H, True)
        M_hat_Y, Gamma_Y = offdiag(M_Y, True)

        mat_factor1 = (1 - zeta) * beta * (D1 * W_HX)
        mat_factor2 = (1 - zeta) * (1 - beta) * M_hat_H + (1 - zeta) * beta * (
            (D1 * M_hat_H) * D1.T
        )
        mat_factor3 = (1 - zeta) * (1 - beta) * (W_YH.T * D2.T)
        mat_factor4 = (1 - zeta) * Gamma_H * ((1 - beta) + beta * (D1.T) ** 2)
        mat_factor5 = M_hat_Y * D2.T
        mat_factor6 = Gamma_Y * D2.T

        v = mat_factor4[0] * h
        u = mat_factor6[0] * y

        PreviousMembraneVoltages = {"v": np.zeros_like(v), "u": np.zeros_like(u)}
        MembraneVoltageNotSettled = 1
        OutputCounter = 0
        while MembraneVoltageNotSettled & (OutputCounter < neural_dynamic_iterations):
            OutputCounter += 1
            if lr_rule == "constant":
                MUV = lr_start
            elif lr_rule == "divide_by_loop_index":
                MUV = max(lr_start / (1 + OutputCounter), lr_stop)
            elif lr_rule == "divide_by_slow_loop_index":
                MUV = max(lr_start / (1 + OutputCounter * lr_decay_multiplier), lr_stop)

            delv = -v + mat_factor1 @ x_current - mat_factor2 @ h + mat_factor3 @ y
            v = v + (MUV) * delv
            h = v / mat_factor4[0]
            h = np.clip(h, -hidden_layer_gain, hidden_layer_gain)
            delu = -u + W_YH @ h - mat_factor5 @ y
            u = u + (MUV) * delu
            y = u / mat_factor6[0]
            y = np.clip(y, -1, 1)

            MembraneVoltageNotSettled = 0
            if (
                np.linalg.norm(v - PreviousMembraneVoltages["v"]) / np.linalg.norm(v)
                > OUTPUT_COMP_TOL
            ) | (
                np.linalg.norm(u - PreviousMembraneVoltages["u"]) / np.linalg.norm(u)
                > OUTPUT_COMP_TOL
            ):
                MembraneVoltageNotSettled = 1
            PreviousMembraneVoltages["v"] = v
            PreviousMembraneVoltages["u"] = u

        return h, y, OutputCounter

    @staticmethod
    @njit
    def run_neural_dynamics_nnantisparse_jit(
        x_current,
        h,
        y,
        M_H,
        M_Y,
        W_HX,
        W_YH,
        D1,
        D2,
        beta,
        zeta,
        neural_dynamic_iterations,
        lr_start,
        lr_stop,
        lr_rule,
        lr_decay_multiplier=0.01,
        hidden_layer_gain=2,
        use_hopfield=True,
        OUTPUT_COMP_TOL=1e-7,
    ):
        """_summary_

        Args:
            x_current (_type_): _description_
            h (_type_): _description_
            y (_type_): _description_
            M_H (_type_): _description_
            M_Y (_type_): _description_
            W_HX (_type_): _description_
            W_YH (_type_): _description_
            D1 (_type_): _description_
            D2 (_type_): _description_
            beta (_type_): _description_
            zeta (_type_): _description_
            neural_dynamic_iterations (_type_): _description_
            lr_start (_type_): _description_
            lr_stop (_type_): _description_
            OUTPUT_COMP_TOL (_type_): _description_
        """

        def offdiag(A, return_diag=False):
            """_summary_

            Args:
                A (_type_): _description_
                return_diag (bool, optional): _description_. Defaults to False.

            Returns:
                _type_: _description_
            """
            if return_diag:
                diag = np.diag(A)
                return A - np.diag(diag), diag
            else:
                return A - np.diag(diag)

        # Adam Optimizer Parameters
        beta1 = 0.8
        beta2 = 0.9
        epsilon = 1e-6

        mt_h = np.zeros_like(h)
        vt_h = np.zeros_like(h)
        mt_y = np.zeros_like(y)
        vt_y = np.zeros_like(y)

        # M_hat_H, Gamma_H = offdiag(M_H, True)
        # M_hat_Y, Gamma_Y = offdiag(M_Y, True)

        mat_factor1 = (1 - zeta) * beta * (D1 * W_HX)
        mat_factor2 = (1 - zeta) * (1 - beta) * M_H + (1 - zeta) * beta * (
            (D1 * M_H) * D1.T
        )
        mat_factor3 = (1 - zeta) * (1 - beta) * (W_YH.T * D2.T)
        # mat_factor4 = (1 - zeta) * Gamma_H * ((1 - beta) + beta * (D1.T) ** 2)
        mat_factor5 = M_Y * D2.T
        # mat_factor6 = Gamma_Y * D2.T

        # v = mat_factor4[0] * h
        # u = mat_factor6[0] * y

        PreviousMembraneVoltages = {"v": np.zeros_like(h), "u": np.zeros_like(y)}
        MembraneVoltageNotSettled = 1
        OutputCounter = 0
        while MembraneVoltageNotSettled & (OutputCounter < neural_dynamic_iterations):
            OutputCounter += 1
            if lr_rule == "constant":
                MUV = lr_start
            elif lr_rule == "divide_by_loop_index":
                MUV = max(lr_start / (1 + OutputCounter), lr_stop)
            elif lr_rule == "divide_by_slow_loop_index":
                MUV = max(lr_start / (1 + OutputCounter * lr_decay_multiplier), lr_stop)

            delh = mat_factor1 @ x_current - mat_factor2 @ h + mat_factor3 @ y
            mt_h = beta1 * mt_h + (1 - beta1)*delh
            vt_h = beta2 * vt_h + (1 - beta2)*delh**2
            mt_hat_h = mt_h / (1 - beta1**OutputCounter)
            vt_hat_h = vt_h / (1 - beta2**OutputCounter)
            h = h + MUV * mt_hat_h / (np.sqrt(vt_hat_h) + epsilon)
            h = np.clip(h, -hidden_layer_gain, hidden_layer_gain)

            dely = W_YH @ h - mat_factor5 @ y
            mt_y = beta1 * mt_y + (1 - beta1)*dely
            vt_y = beta2 * vt_y + (1 - beta2)*dely**2

            mt_hat_y = mt_y / (1 - beta1**OutputCounter)
            vt_hat_y = vt_y / (1 - beta2**OutputCounter)
            y = y + MUV * mt_hat_y / (np.sqrt(vt_hat_y) + epsilon)

            y = np.clip(y, 0, 1)

            MembraneVoltageNotSettled = 0
            if (
                np.linalg.norm(h - PreviousMembraneVoltages["v"]) / np.linalg.norm(h + 1e-10)
                > OUTPUT_COMP_TOL
            ) | (
                np.linalg.norm(y - PreviousMembraneVoltages["u"]) / np.linalg.norm(y + 1e-10)
                > OUTPUT_COMP_TOL
            ):
                MembraneVoltageNotSettled = 1
            PreviousMembraneVoltages["v"] = h
            PreviousMembraneVoltages["u"] = y

        return h, y, OutputCounter

    def fit_batch_antisparse(
        self,
        X,
        n_epochs=5,
        neural_dynamic_iterations=750,
        neural_lr_start=0.2,
        neural_lr_stop=0.05,
        synaptic_lr_rule="divide_by_log_index",
        neural_loop_lr_rule="divide_by_slow_loop_index",
        synaptic_lr_decay_divider=5000,
        neural_lr_decay_multiplier=0.005,
        hidden_layer_gain=10,
        clip_gain_gradients=False,
        gain_grads_clipping_multiplier = 1,
        shuffle=True,
        debug_iteration_point=1000,
        plot_in_jupyter=False,
    ):

        #  (self, X, n_epochs = 5, neural_dynamic_iterations = 750, neural_lr_start = 0.2, neural_lr_stop = 0.05,
        #    synaptic_lr_rule = "divide_by_log_index", neural_loop_lr_rule = "divide_by_slow_loop_index",
        #    hidden_layer_gain = 10, clip_gain_gradients = True, shuffle = True, debug_iteration_point = 1000,
        #    plot_in_jupyter = False)
        """_summary_

        Args:
            X (_type_): _description_
            n_epochs (int, optional): _description_. Defaults to 5.
            neural_dynamic_iterations (int, optional): _description_. Defaults to 750.
            neural_lr_start (float, optional): _description_. Defaults to 0.2.
            neural_lr_stop (float, optional): _description_. Defaults to 0.05.
            shuffle (bool, optional): _description_. Defaults to True.
            debug_iteration_point (int, optional): _description_. Defaults to 1000.
            plot_in_jupyter (bool, optional): _description_. Defaults to False.
        """
        (
            gammaM_H_start,
            gammaM_H_stop,
            gammaW_HX_start,
            gammaW_HX_stop,
            gammaM_Y_start,
            gammaM_Y_stop,
            gammaW_YH_start,
            gammaW_YH_stop,
            beta,
            zeta,
            muD,
            W_HX,
            W_YH,
            M_H,
            M_Y,
            D1,
            D2,
        ) = (
            self.gammaM_H_start,
            self.gammaM_H_stop,
            self.gammaW_HX_start,
            self.gammaW_HX_stop,
            self.gammaM_Y_start,
            self.gammaM_Y_stop,
            self.gammaW_YH_start,
            self.gammaW_YH_stop,
            self.beta,
            self.zeta,
            np.array(self.muD),
            self.W_HX,
            self.W_YH,
            self.M_H,
            self.M_Y,
            self.D1,
            self.D2,
        )
        LayerMinimumGains = self.LayerMinimumGains
        LayerMaximumGains = self.LayerMaximumGains
        neural_OUTPUT_COMP_TOL = self.neural_OUTPUT_COMP_TOL
        debugging = self.set_ground_truth

        assert (
            X.shape[0] == self.x_dim
        ), "You must input the transpose, or you need to change one of the following hyperparameters: s_dim, x_dim"
        D1list = []
        D2list = []
        self.SV_list = []
        s_dim = self.s_dim
        h_dim = self.h_dim
        samples = X.shape[1]

        if self.Y is None:
            H = np.zeros((h_dim, samples))
            Y = np.zeros((s_dim, samples))
        else:
            H, Y = self.H, self.Y

        if debugging:
            SIR_list = self.SIR_list
            SNR_list = self.SNR_list
            S = self.S
            A = self.A
            plt.figure(figsize=(70, 50), dpi=80)

        for k in range(n_epochs):
            if shuffle:
                idx = np.random.permutation(samples)
            else:
                idx = np.arange(samples)

            for i_sample in tqdm(range(samples)):

                if ((i_sample + 1) % 100000) == 0:
                    muD = 0.99 * np.array(muD)

                x_current = X[:, idx[i_sample]]  # Take one input

                y = Y[:, idx[i_sample]]

                h = H[:, idx[i_sample]]

                h, y, _ = self.run_neural_dynamics_antisparse_jit(
                    x_current=x_current,
                    h=h,
                    y=y,
                    M_H=M_H,
                    M_Y=M_Y,
                    W_HX=W_HX,
                    W_YH=W_YH,
                    D1=D1,
                    D2=D2,
                    beta=beta,
                    zeta=zeta,
                    neural_dynamic_iterations=neural_dynamic_iterations,
                    lr_start=neural_lr_start,
                    lr_stop=neural_lr_stop,
                    lr_rule=neural_loop_lr_rule,
                    lr_decay_multiplier=neural_lr_decay_multiplier,
                    hidden_layer_gain=hidden_layer_gain,
                    OUTPUT_COMP_TOL=neural_OUTPUT_COMP_TOL,
                )

                if synaptic_lr_rule == "constant":
                    MU_MH = gammaM_H_start[0]
                    MU_MY = gammaM_Y_start[1]
                    MU_WHX = gammaW_HX_start[0]
                    MU_WYH = gammaW_YH_start[1]
                elif synaptic_lr_rule == "divide_by_log_index":
                    # MUS = np.max([gamma_start/(1 + np.log(2 + (i_sample))), gamma_stop])
                    MU_MH = np.max(
                        [
                            gammaM_H_start[0]
                            / (1 + np.log(2 + (i_sample // synaptic_lr_decay_divider))),
                            gammaM_H_stop[0],
                        ]
                    )
                    MU_MY = np.max(
                        [
                            gammaM_Y_start[1]
                            / (1 + np.log(2 + (i_sample // synaptic_lr_decay_divider))),
                            gammaM_Y_stop[1],
                        ]
                    )
                    MU_WHX = np.max(
                        [
                            gammaW_HX_start[0]
                            / (1 + np.log(2 + (i_sample // synaptic_lr_decay_divider))),
                            gammaW_HX_stop[0],
                        ]
                    )
                    MU_WYH = np.max(
                        [
                            gammaW_YH_start[1]
                            / (1 + np.log(2 + (i_sample // synaptic_lr_decay_divider))),
                            gammaW_YH_stop[1],
                        ]
                    )
                elif synaptic_lr_rule == "divide_by_index":
                    MU_MH = np.max(
                        [
                            gammaM_H_start[0]
                            / (i_sample // synaptic_lr_decay_divider + 1),
                            gammaM_H_stop[0],
                        ]
                    )
                    MU_MY = np.max(
                        [
                            gammaM_Y_start[1]
                            / (i_sample // synaptic_lr_decay_divider + 1),
                            gammaM_Y_stop[1],
                        ]
                    )
                    MU_WHX = np.max(
                        [
                            gammaW_HX_start[0]
                            / (i_sample // synaptic_lr_decay_divider + 1),
                            gammaW_HX_stop[0],
                        ]
                    )
                    MU_WYH = np.max(
                        [
                            gammaW_YH_start[1]
                            / (i_sample // synaptic_lr_decay_divider + 1),
                            gammaW_YH_stop[1],
                        ]
                    )

                W_HX, W_YH, M_H, M_Y, D1, D2 = self.update_weights_jit(
                    x_current,
                    h,
                    y,
                    zeta,
                    beta,
                    W_HX,
                    W_YH,
                    M_H,
                    M_Y,
                    D1,
                    D2,
                    MU_MH,
                    MU_MY,
                    MU_WHX,
                    MU_WYH,
                    muD,
                    LayerMinimumGains,
                    LayerMaximumGains,
                    clip_gain_gradients,
                    gain_grads_clipping_multiplier,
                )

                Y[:, idx[i_sample]] = y
                H[:, idx[i_sample]] = h

                if debugging:
                    if (i_sample % debug_iteration_point) == 0:
                        try:
                            W = self.compute_overall_mapping_jit(
                                beta, zeta, D1, D2, M_H, M_Y, W_HX, W_YH
                            )
                            self.W = W

                            (
                                SINR_current,
                                SNR_current,
                                SGG,
                                Y_,
                                P,
                            ) = self.evaluate_for_debug(W, A, S, X)

                            self.SV_list.append(abs(SGG))

                            SNR_list.append(SNR_current)
                            SIR_list.append(SINR_current)

                            if plot_in_jupyter:
                                D1list.append(
                                    D1.reshape(
                                        -1,
                                    )
                                )
                                D2list.append(
                                    D2.reshape(
                                        -1,
                                    )
                                )
                                YforPlot = Y[:, idx[i_sample - 25 : i_sample]].T
                                self.plot_for_debug(
                                    SIR_list,
                                    SNR_list,
                                    D1list,
                                    D2list,
                                    P,
                                    debug_iteration_point,
                                    YforPlot,
                                )

                            self.W_HX = W_HX
                            self.W_YH = W_YH
                            self.M_H = M_H
                            self.M_Y = M_Y
                            self.D1 = D1
                            self.D2 = D2

                            self.H = H
                            self.Y = Y
                            self.SIR_list = SIR_list
                            self.SNR_list = SNR_list
                        except Exception as e:
                            print(str(e))
        self.W_HX = W_HX
        self.W_YH = W_YH
        self.M_H = M_H
        self.M_Y = M_Y
        self.D1 = D1
        self.D2 = D2

        self.H = H
        self.Y = Y
        self.SIR_list = SIR_list
        self.SNR_list = SNR_list

    def fit_batch_nnantisparse(
        self,
        X,
        n_epochs=5,
        neural_dynamic_iterations=750,
        neural_lr_start=0.2,
        neural_lr_stop=0.05,
        synaptic_lr_rule="divide_by_log_index",
        neural_loop_lr_rule="divide_by_slow_loop_index",
        synaptic_lr_decay_divider=5000,
        neural_lr_decay_multiplier=0.005,
        hidden_layer_gain=10,
        clip_gain_gradients=True,
        gain_grads_clipping_multiplier = 0.01,
        shuffle=True,
        debug_iteration_point=1000,
        plot_in_jupyter=False,
    ):
        """_summary_

        Args:
            X (_type_): _description_
            n_epochs (int, optional): _description_. Defaults to 5.
            neural_dynamic_iterations (int, optional): _description_. Defaults to 750.
            neural_lr_start (float, optional): _description_. Defaults to 0.2.
            neural_lr_stop (float, optional): _description_. Defaults to 0.05.
            shuffle (bool, optional): _description_. Defaults to True.
            debug_iteration_point (int, optional): _description_. Defaults to 1000.
            plot_in_jupyter (bool, optional): _description_. Defaults to False.
        """
        (
            gammaM_H_start,
            gammaM_H_stop,
            gammaW_HX_start,
            gammaW_HX_stop,
            gammaM_Y_start,
            gammaM_Y_stop,
            gammaW_YH_start,
            gammaW_YH_stop,
            beta,
            zeta,
            muD,
            W_HX,
            W_YH,
            M_H,
            M_Y,
            D1,
            D2,
        ) = (
            self.gammaM_H_start,
            self.gammaM_H_stop,
            self.gammaW_HX_start,
            self.gammaW_HX_stop,
            self.gammaM_Y_start,
            self.gammaM_Y_stop,
            self.gammaW_YH_start,
            self.gammaW_YH_stop,
            self.beta,
            self.zeta,
            np.array(self.muD),
            self.W_HX,
            self.W_YH,
            self.M_H,
            self.M_Y,
            self.D1,
            self.D2,
        )
        LayerMinimumGains = self.LayerMinimumGains
        LayerMaximumGains = self.LayerMaximumGains
        debugging = self.set_ground_truth

        assert (
            X.shape[0] == self.x_dim
        ), "You must input the transpose, or you need to change one of the following hyperparameters: s_dim, x_dim"
        D1list = []
        D2list = []
        self.SV_list = []
        s_dim = self.s_dim
        h_dim = self.h_dim
        samples = X.shape[1]

        if self.Y is None:
            H = np.zeros((h_dim, samples))
            Y = np.zeros((s_dim, samples))
        else:
            H, Y = self.H, self.Y

        if debugging:
            SIR_list = self.SIR_list
            SNR_list = self.SNR_list
            S = self.S
            A = self.A
            Szeromean = S - S.mean(axis=1).reshape(-1, 1)
            plt.figure(figsize=(70, 50), dpi=80)

        for k in range(n_epochs):
            if shuffle:
                idx = np.random.permutation(samples)
            else:
                idx = np.arange(samples)

            for i_sample in tqdm(range(samples)):

                if ((i_sample + 1) % 100000) == 0:
                    muD = 0.99 * np.array(muD)

                x_current = X[:, idx[i_sample]]  # Take one input

                y = Y[:, idx[i_sample]]

                h = H[:, idx[i_sample]]
                neural_OUTPUT_COMP_TOL = self.neural_OUTPUT_COMP_TOL

                h, y, _ = self.run_neural_dynamics_nnantisparse_jit(
                    x_current=x_current,
                    h=h,
                    y=y,
                    M_H=M_H,
                    M_Y=M_Y,
                    W_HX=W_HX,
                    W_YH=W_YH,
                    D1=D1,
                    D2=D2,
                    beta=beta,
                    zeta=zeta,
                    neural_dynamic_iterations=neural_dynamic_iterations,
                    lr_start=neural_lr_start,
                    lr_stop=neural_lr_stop,
                    lr_rule=neural_loop_lr_rule,
                    lr_decay_multiplier=neural_lr_decay_multiplier,
                    hidden_layer_gain=hidden_layer_gain,
                    OUTPUT_COMP_TOL=neural_OUTPUT_COMP_TOL,
                )

                if synaptic_lr_rule == "constant":
                    MU_MH = gammaM_H_start[0]
                    MU_MY = gammaM_Y_start[1]
                    MU_WHX = gammaW_HX_start[0]
                    MU_WYH = gammaW_YH_start[1]
                elif synaptic_lr_rule == "divide_by_log_index":
                    # MUS = np.max([gamma_start/(1 + np.log(2 + (i_sample))), gamma_stop])
                    MU_MH = np.max(
                        [
                            gammaM_H_start[0]
                            / (1 + np.log(2 + (i_sample // synaptic_lr_decay_divider))),
                            gammaM_H_stop[0],
                        ]
                    )
                    MU_MY = np.max(
                        [
                            gammaM_Y_start[1]
                            / (1 + np.log(2 + (i_sample // synaptic_lr_decay_divider))),
                            gammaM_Y_stop[1],
                        ]
                    )
                    MU_WHX = np.max(
                        [
                            gammaW_HX_start[0]
                            / (1 + np.log(2 + (i_sample // synaptic_lr_decay_divider))),
                            gammaW_HX_stop[0],
                        ]
                    )
                    MU_WYH = np.max(
                        [
                            gammaW_YH_start[1]
                            / (1 + np.log(2 + (i_sample // synaptic_lr_decay_divider))),
                            gammaW_YH_stop[1],
                        ]
                    )
                elif synaptic_lr_rule == "divide_by_index":
                    MU_MH = np.max(
                        [
                            gammaM_H_start[0]
                            / (i_sample // synaptic_lr_decay_divider + 1),
                            gammaM_H_stop[0],
                        ]
                    )
                    MU_MY = np.max(
                        [
                            gammaM_Y_start[1]
                            / (i_sample // synaptic_lr_decay_divider + 1),
                            gammaM_Y_stop[1],
                        ]
                    )
                    MU_WHX = np.max(
                        [
                            gammaW_HX_start[0]
                            / (i_sample // synaptic_lr_decay_divider + 1),
                            gammaW_HX_stop[0],
                        ]
                    )
                    MU_WYH = np.max(
                        [
                            gammaW_YH_start[1]
                            / (i_sample // synaptic_lr_decay_divider + 1),
                            gammaW_YH_stop[1],
                        ]
                    )

                W_HX, W_YH, M_H, M_Y, D1, D2 = self.update_weights_jit(
                    x_current,
                    h,
                    y,
                    zeta,
                    beta,
                    W_HX,
                    W_YH,
                    M_H,
                    M_Y,
                    D1,
                    D2,
                    MU_MH,
                    MU_MY,
                    MU_WHX,
                    MU_WYH,
                    muD,
                    LayerMinimumGains,
                    LayerMaximumGains,
                    clip_gain_gradients,
                    gain_grads_clipping_multiplier,
                )
                Y[:, idx[i_sample]] = y
                H[:, idx[i_sample]] = h

                if debugging:
                    if (i_sample % debug_iteration_point) == 0:
                        try:
                            W = self.compute_overall_mapping_jit(
                                beta, zeta, D1, D2, M_H, M_Y, W_HX, W_YH
                            )
                            self.W = W

                            (
                                SINR_current,
                                SNR_current,
                                SGG,
                                Y_,
                                P,
                            ) = self.evaluate_for_debug(W, A, S, X, False)

                            self.SV_list.append(abs(SGG))

                            SNR_list.append(SNR_current)
                            SIR_list.append(SINR_current)

                            if plot_in_jupyter:
                                D1list.append(
                                    D1.reshape(
                                        -1,
                                    )
                                )
                                D2list.append(
                                    D2.reshape(
                                        -1,
                                    )
                                )
                                YforPlot = Y[:, idx[i_sample - 25 : i_sample]].T
                                self.plot_for_debug(
                                    SIR_list,
                                    SNR_list,
                                    D1list,
                                    D2list,
                                    P,
                                    debug_iteration_point,
                                    YforPlot,
                                )

                            self.W_HX = W_HX
                            self.W_YH = W_YH
                            self.M_H = M_H
                            self.M_Y = M_Y
                            self.D1 = D1
                            self.D2 = D2

                            self.H = H
                            self.Y = Y
                            self.SIR_list = SIR_list
                            self.SNR_list = SNR_list
                        except Exception as e:
                            print(str(e))
        self.W_HX = W_HX
        self.W_YH = W_YH
        self.M_H = M_H
        self.M_Y = M_Y
        self.D1 = D1
        self.D2 = D2

        self.H = H
        self.Y = Y
        self.SIR_list = SIR_list
        self.SNR_list = SNR_list
